# Supplementary material for: Can the isonitrile biosynthesis enzyme ScoE assist with the biosynthesis of isonitrile groups in drug molecules? A computational study
Source: Royal Society of Chemistry journal article supplement (doi:10.1039/d2cp03409c), 2022-01-01
Supplement: d2cp03409c1.pdf [file d2cp03409c1.pdf]

## Electronic Supporting Information

### **Can the isonitrile biosynthesis nonheme iron enzyme ScoE assist with the biosynthesis of isonitrile groups in drug molecules? A computational study**

Henrik P. H. Wong,<sup>ab</sup> Thirakorn Mekkawes<sup>ab</sup> and Sam P. de Visser<sup>\*ab</sup>

- a. Manchester Institute of Biotechnology, 131 Princess Street, Manchester M1 7DN, United Kingdom.
- b. Department of Chemical Engineering, Oxford Road, Manchester M13 9PL, United Kingdom.

Corresponding author email: [sam.devisser@manchester.ac.uk](mailto:sam.devisser@manchester.ac.uk)

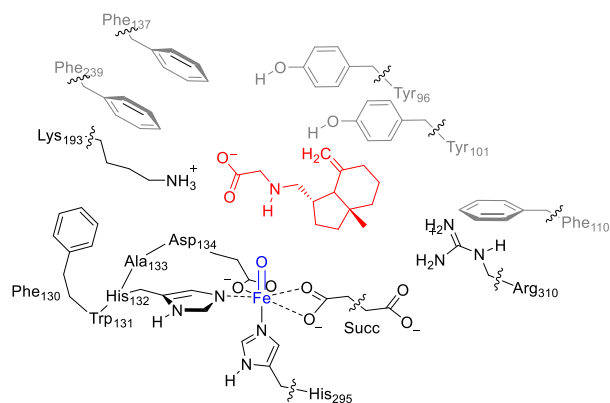

**Scheme S1: Cluster model used in this work.**

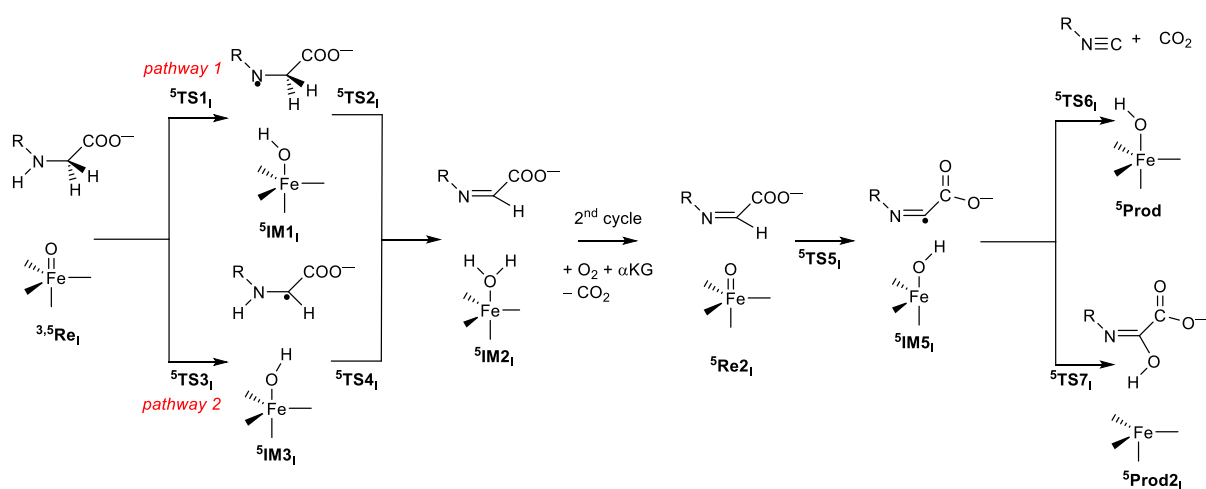

**Scheme S2: Reaction mechanism explored in this work with labelling of the structures.**

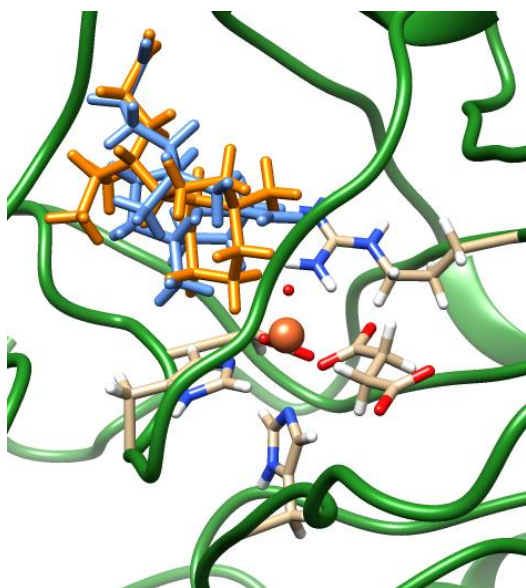

$\gamma$ -Gly-A docked positions in 6XN6 pdb

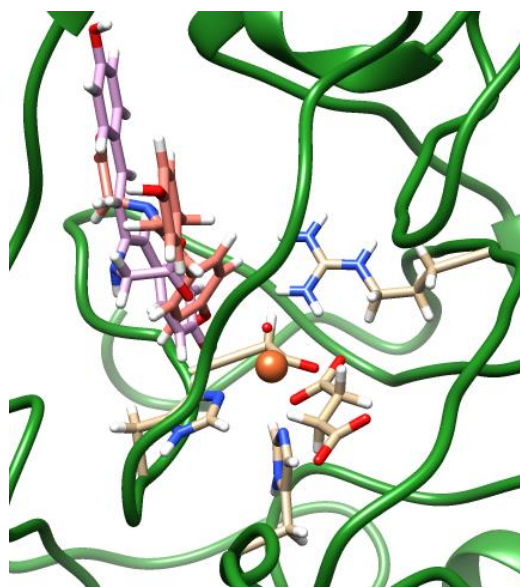

$\gamma$ -Gly-B docked positions in 6XN6 pdb

**Fig. S1: Molecular docking results using AutoDock Vina software as implemented in Chimera. (a)  $\gamma$ -Gly-A docking into 6XN6 pdb file under the following conditions: Box setting center (1.30561, -27.054, 176.231), Size (18.3011, 15.3327, 24.345) with maximum energy difference of 3 kcal/mol. (b)  $\gamma$ -Gly-B docking into 6XN8 pdb file under the following conditions: Box setting center (0.718422, -25.7091, 176.102), Size (19.4755, 18.0226, 24.6025) with maximum energy difference of 3 kcal/mol.**

**Part I: MD simulation with substrate A or B bound structures.**

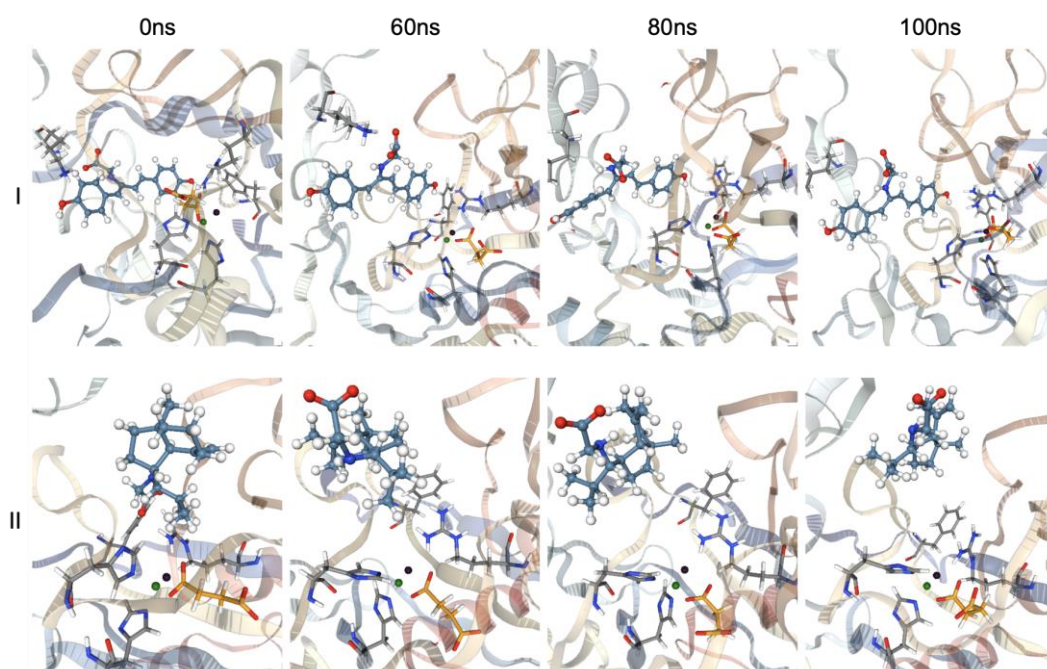

**Fig. S2: Binding poses of the substrate in the substrate-binding pocket during the MD simulations. Top row are substrate  $\gamma$ -Gly-B snapshots and bottom row are substrate  $\gamma$ -Gly-A snapshots. Structures were collected after 0, 60, 80 and 100 ns of the MD simulation.**

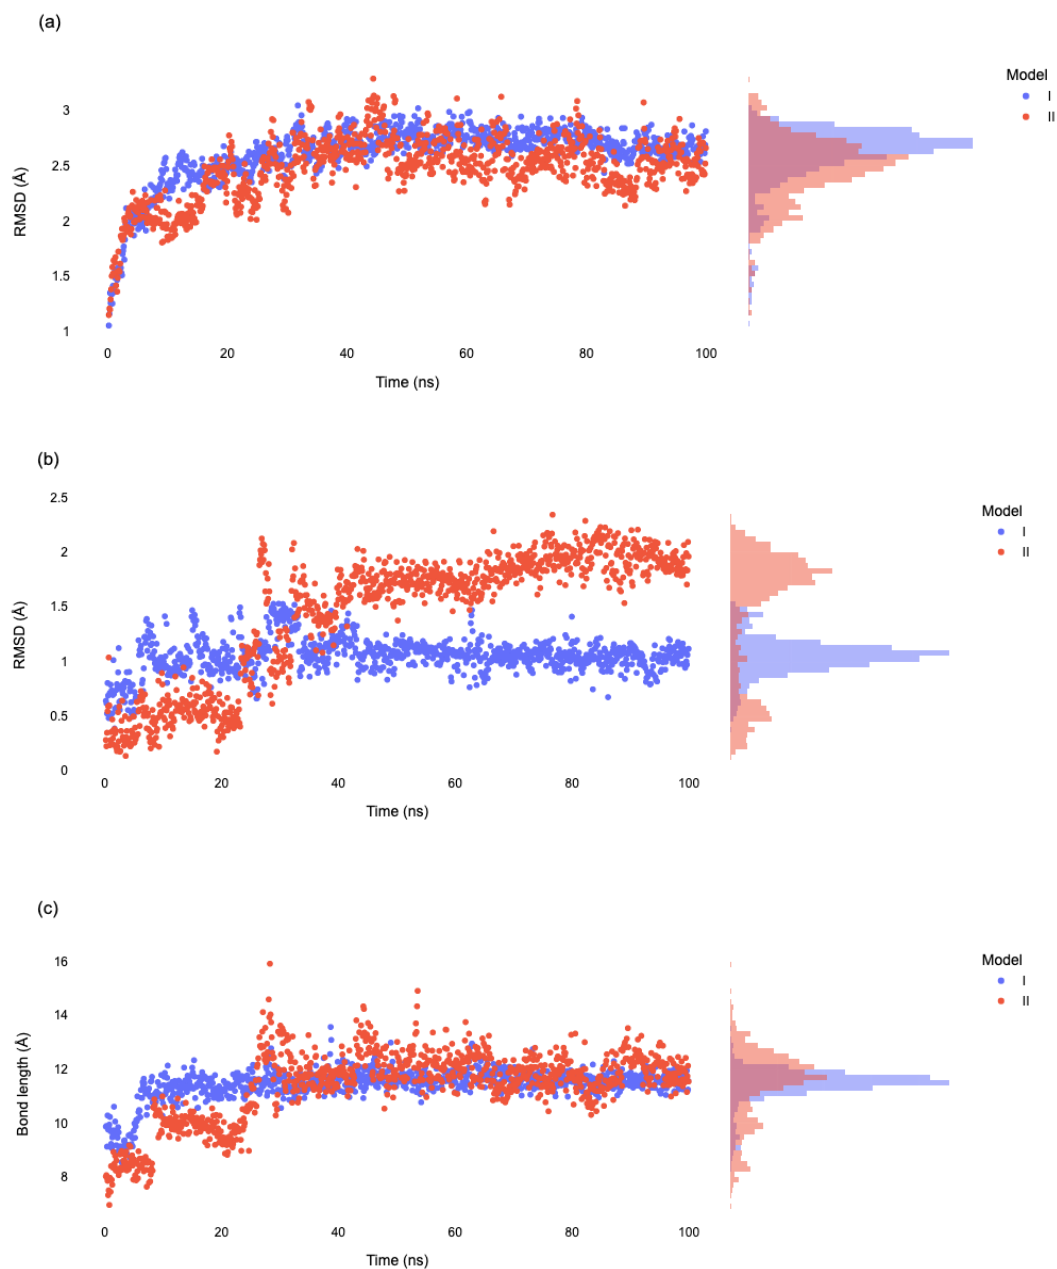

**Fig. S3.** RMSD values along the MD simulation and bond length of two different reactant models from MD calculation: Model I has substrate  $\gamma$ -Gly-B and model II has substrate  $\gamma$ -Gly-A. (a) RMSD for the complete system of the protein, oxidant and substrate, while (b) is RMSD for the substrate only. (c) is bond length of the center of mass of the substrate with the oxygen atom (O=Fe) for each snapshot.

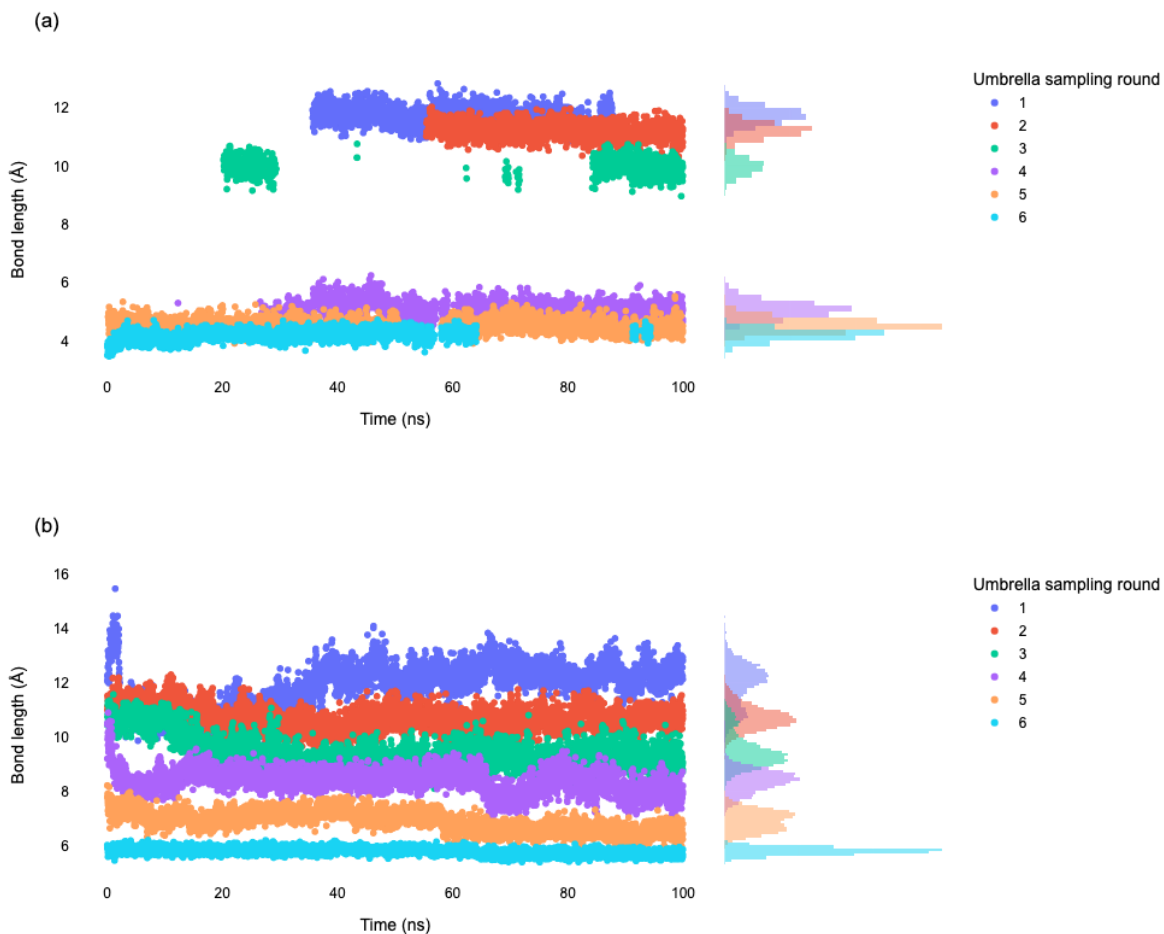

**Fig. S4.** Umbrella sampling starting from the last point of the MD simulation of Figure S2 for an additional 100 ns. The bond lengths of substrates from umbrella sampling. (a) and (b) are the bond lengths between substrate and oxygen (O=Fe). Umbrella sampling done with an additional force constant with magnitudes of 0.0, 0.2, 0.5, 1.0, 3.0, and 8 kcal/mol.

The shortest distance between the center of substrate  $\gamma$ -Gly-**B** and O=Fe is 3.4 Å.

The shortest distance between the center of substrate  $\gamma$ -Gly-**A** and O=Fe is 5.4 Å.

Part II: QM cluster calculations on the model with substrate  $\gamma$ -Gly-A.

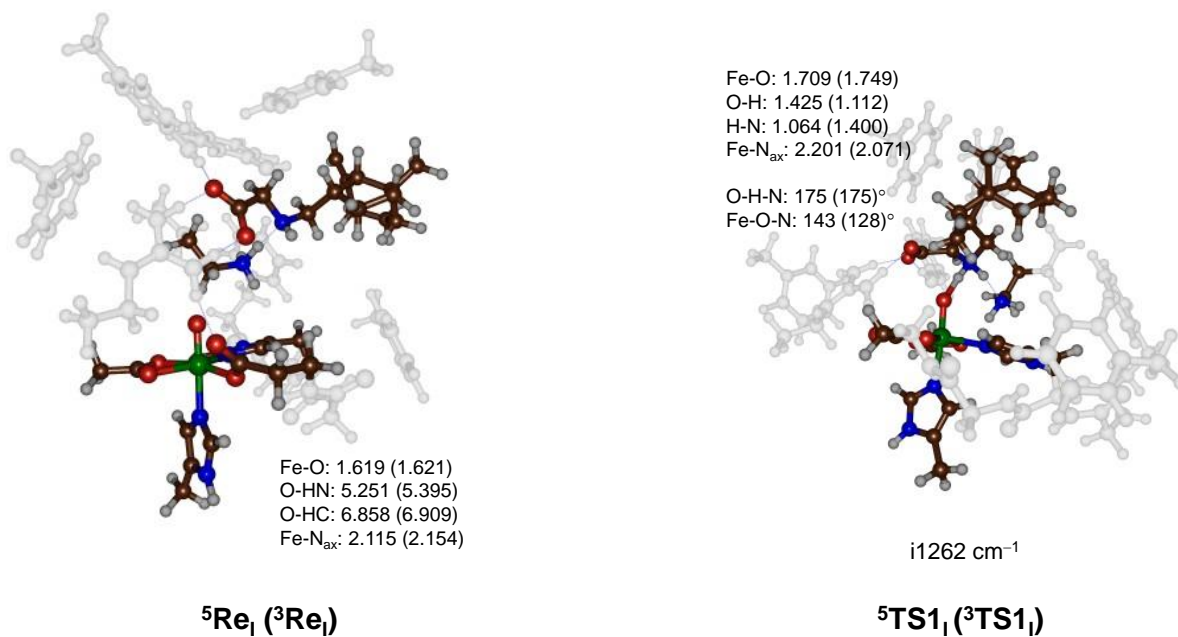

Fig. S5: UB3LYP/BS1 optimized geometries along the reaction mechanism. Bond lengths in angstroms, bond angles in degrees and the imaginary frequency in cm<sup>-1</sup>.

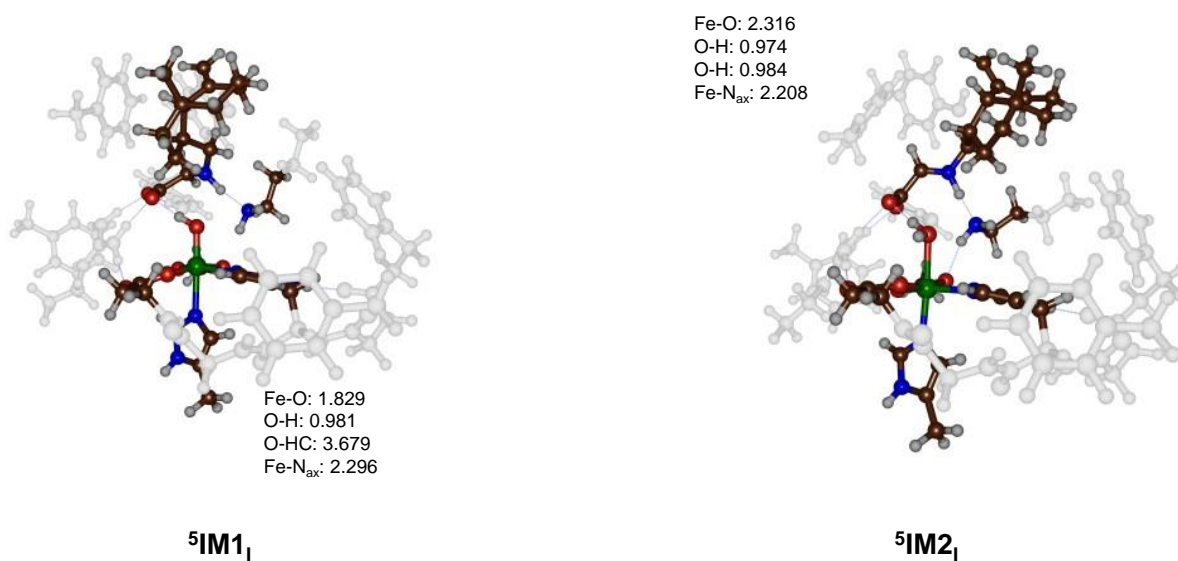

Fig. S6: UB3LYP/BS1 optimized geometries along the reaction mechanism. Bond lengths in angstroms and bond angles in degrees.

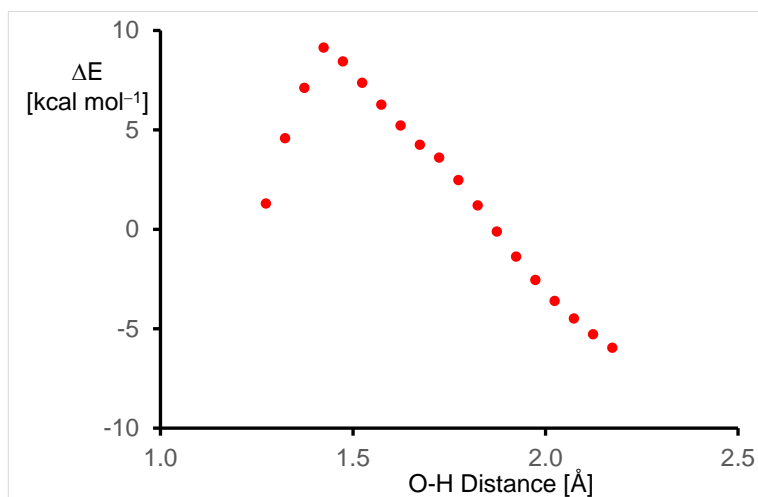

**Fig. S7:** UB3LYP/BS1 calculated geometry scan for the pathway from <sup>5</sup>Re<sub>1</sub> to <sup>5</sup>IM1<sub>i</sub>. Each data point represents a full geometry optimization with fixed O–H distance. The maximum of the scan was used as a starting point for the transition state geometry optimization.

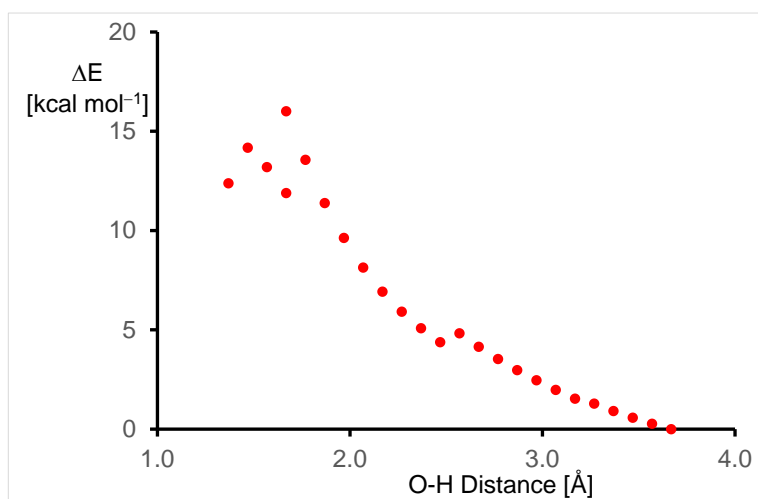

**Fig. S8:** UB3LYP/BS1 calculated geometry scan for the pathway from <sup>5</sup>IM1<sub>i</sub> to <sup>5</sup>IM2<sub>i</sub>. Each data point represents a full geometry optimization with fixed O–H distance. The maximum of the scan was used as a starting point for the transition state geometry optimization.



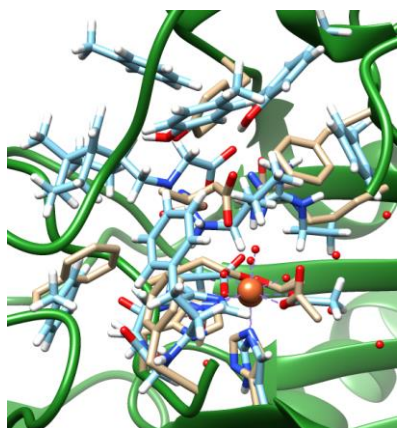

Overlay 6XN6 pdb and <sup>5</sup>Re<sub>1</sub>

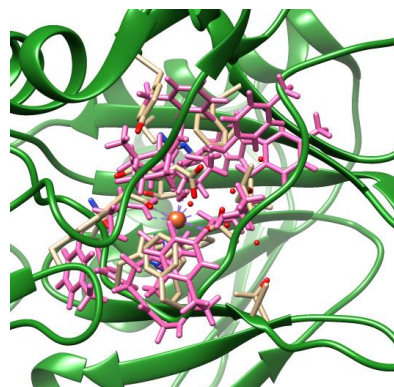

Overlay 6XN6 pdb and <sup>5</sup>TS<sub>1</sub>

**Fig. S9: Overlays of DFT optimized geometries with the original crystal structure coordinates of the 6XN6 pdb with <sup>5</sup>Re<sub>1</sub> and <sup>5</sup>TS<sub>1</sub>. As can be seen most groups are located in a similar position and the chains match well.**

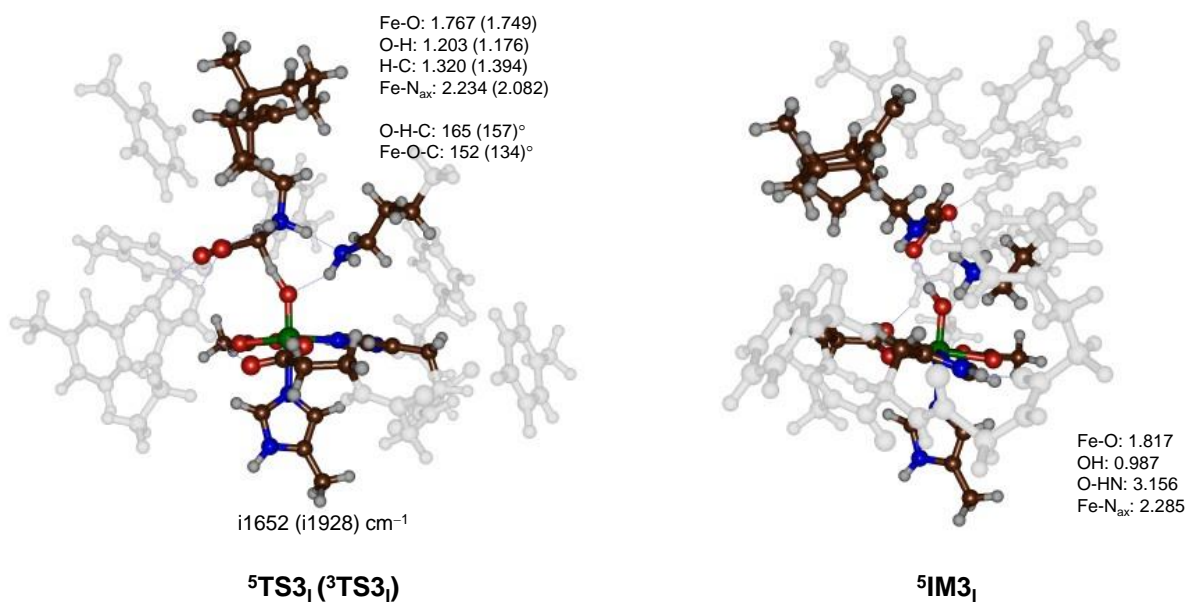

**Fig. S10: UB3LYP/BS1 optimized geometries along the reaction mechanism. Bond lengths in angstroms, bond angles in degrees and the imaginary frequency in cm<sup>-1</sup>.**

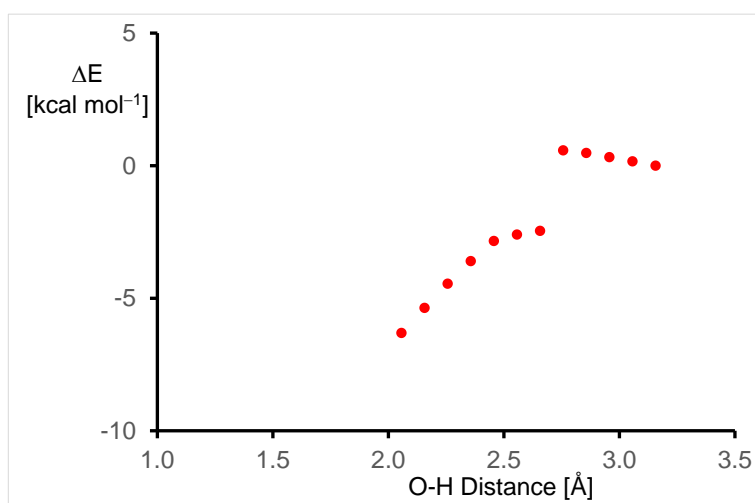

**Fig. S11: UB3LYP/BS1 calculated geometry scan for the pathway from <sup>5</sup>IM<sub>3</sub><sub>1</sub> to <sup>5</sup>IM<sub>2</sub><sub>1</sub>. Each data point represents a full geometry optimization with fixed O–H distance. From the scan an estimated barrier of 0.5 kcal mol<sup>-1</sup> is predicted for <sup>5</sup>TS<sub>4</sub><sub>1</sub> with respect to <sup>5</sup>IM<sub>3</sub><sub>1</sub>.**

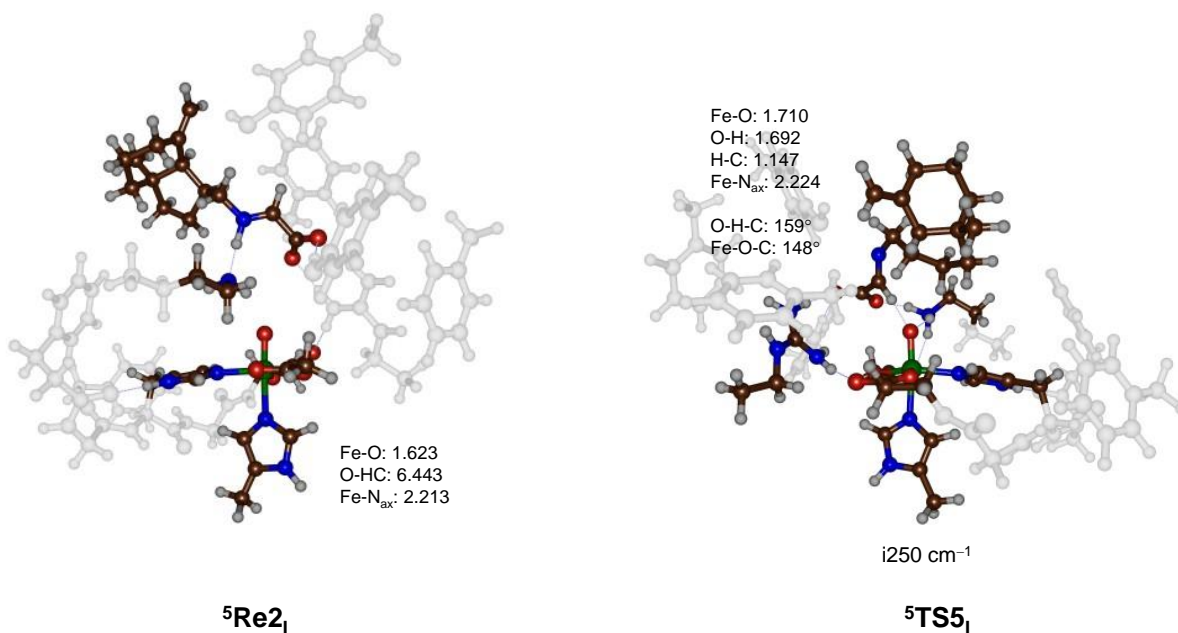

**Fig. S12: UB3LYP/BS1 optimized geometries along the reaction mechanism. Bond lengths in angstroms, bond angles in degrees and the imaginary frequency in cm<sup>-1</sup>.**

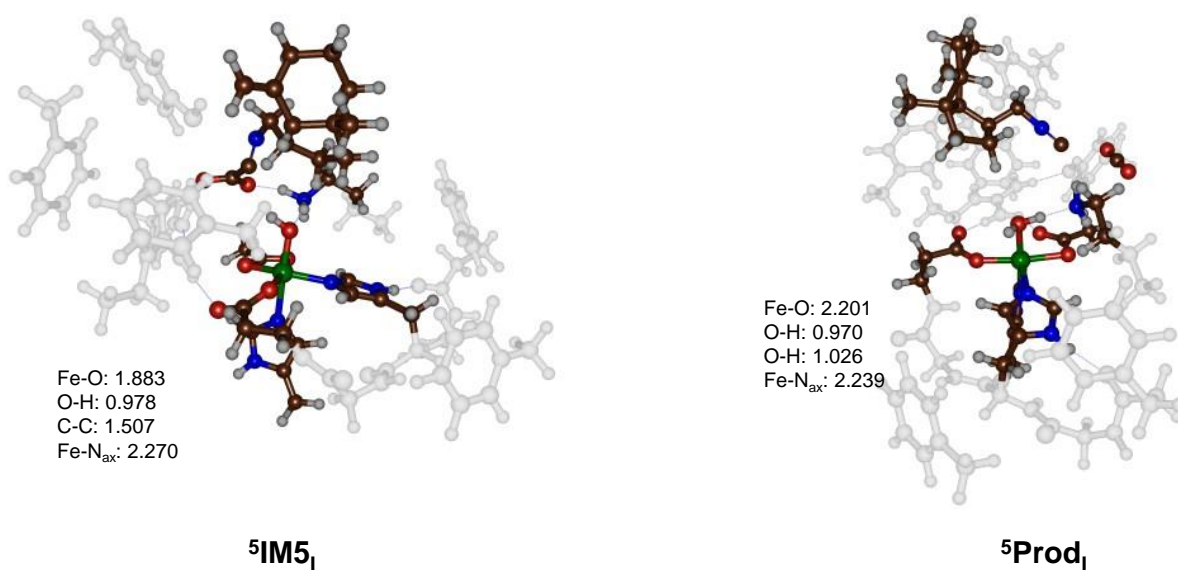

**Fig. S13: UB3LYP/BS1 optimized geometries along the reaction mechanism. Bond lengths in angstroms, bond angles in degrees and the imaginary frequency in cm<sup>-1</sup>.**

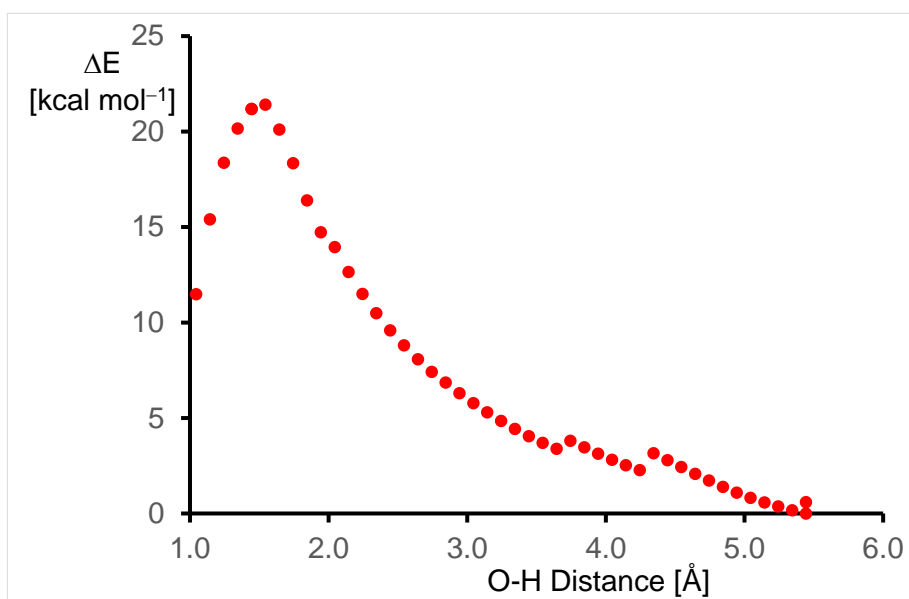

Fig. S14: UB3LYP/BS1 calculated geometry scan for the pathway from  ${}^5\text{Re}2_{\text{I}}$  to  ${}^5\text{IM}5_{\text{I}}$ . Each data point represents a full geometry optimization with fixed O–H distance. The maximum of the scan was used as a starting point for the transition state geometry optimization.

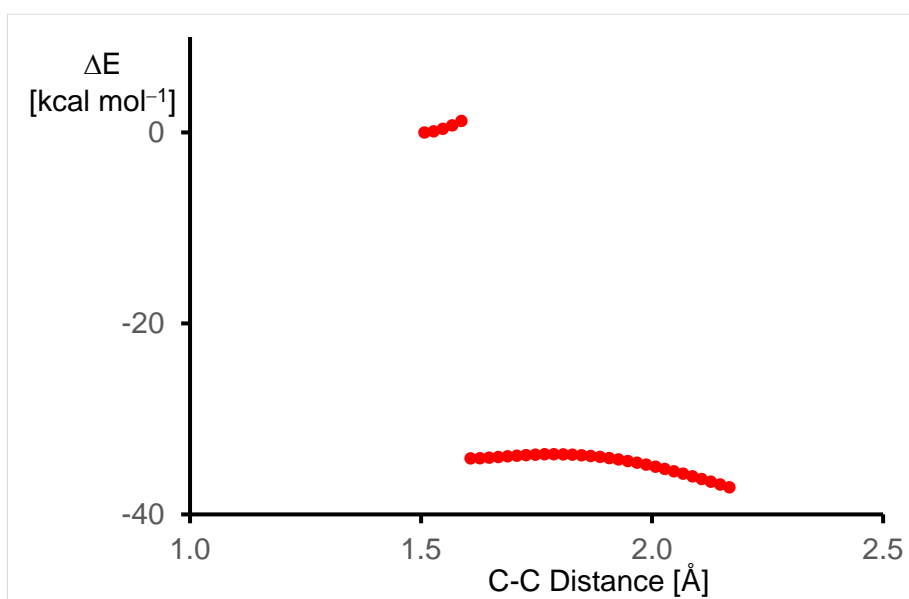

Fig. S15: UB3LYP/BS1 calculated geometry scan for the pathway from  ${}^5\text{IM}5_{\text{I}}$  to  ${}^5\text{Prod}_{\text{I}}$ . Each data point represents a full geometry optimization with fixed O–H distance. The maximum of the scan is about  $1.2 \text{ kcal mol}^{-1}$  above the energy of  ${}^5\text{IM}5_{\text{I}}$ .

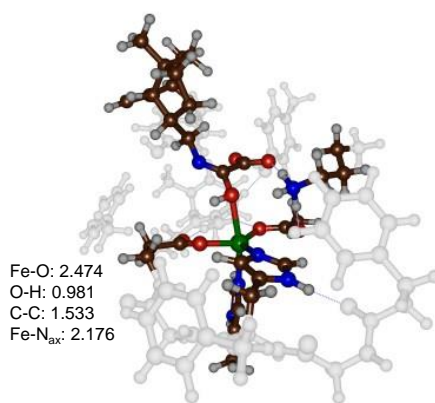

<sup>5</sup>Prod2<sub>i</sub>

**Fig. S16: UB3LYP/BS1 optimized geometries along the reaction mechanism. Bond lengths in angstroms, bond angles in degrees and the imaginary frequency in cm<sup>-1</sup>.**

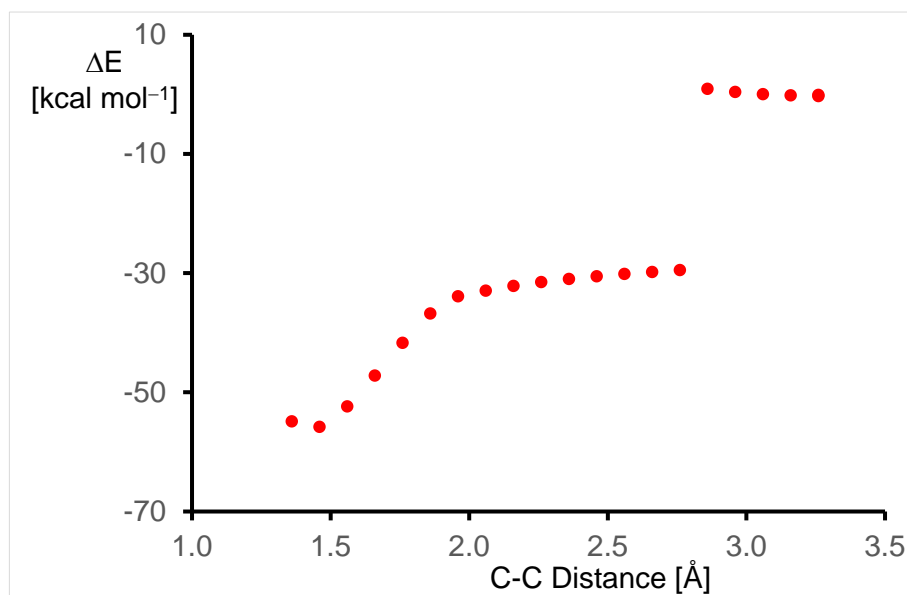

**Fig. S17: UB3LYP/BS1 calculated geometry scan for the pathway from <sup>5</sup>IM5<sub>i</sub> to <sup>5</sup>Prod2<sub>i</sub>. Each data point represents a full geometry optimization with fixed O–H distance. The maximum of the scan is about 1.0 kcal mol<sup>-1</sup> above the energy of <sup>5</sup>IM5<sub>i</sub>.**

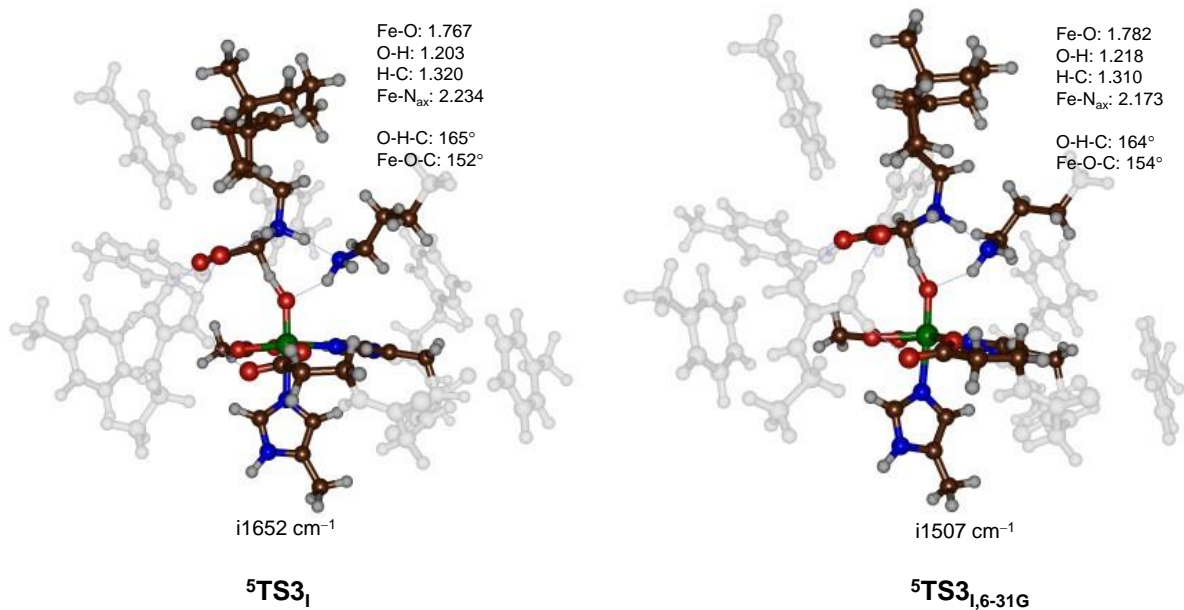

**Fig. S18: Optimized geometries along the reaction mechanism as calculated with a different basis set. Left-hand-side UB3LYP/BS1 and right-hand-side UB3LYP/BS0 optimized geometry of <sup>5</sup>TS<sub>3i</sub>. BS0 stands for LANL2DZ with core potential on iron and 6-31G on the rest of the atoms. Bond lengths in angstroms, bond angles in degrees and the imaginary frequency in cm<sup>-1</sup>. As can be seen an enlarged basis set has little effect on the optimized geometries.**

**Table S1: Absolute (free) energies of UB3LYP/BS1 optimized geometries for the reaction pathway of  $\gamma$ -Gly-A activation by the iron(IV)-oxo species of ScoE for cycle 1 as obtained in Gaussian-09.**

|                               | E [BS1, au] | ZPE [au] | G [au]      | E [BS2, au] | E [BS2, solv] | E [BS3, solv] |
|-------------------------------|-------------|----------|-------------|-------------|---------------|---------------|
| <sup>5</sup> Re <sub>i</sub>  | -5086.37245 | 1.97268  | -5084.60447 | -5087.67023 | -5087.74486   | -5087.24294   |
| <sup>3</sup> Re <sub>i</sub>  | -5086.36832 | 1.97420  | -5084.59716 | -5087.66261 | -5087.73812   | -5087.23730   |
| <sup>5</sup> TS1 <sub>i</sub> | -5086.35770 | 1.96363  | -5084.60194 | -5087.65817 | -5087.72184   | -5087.22077   |
| <sup>5</sup> IM1 <sub>i</sub> | -5086.38561 | 1.96845  | -5084.62180 | -5087.68674 | -5087.75192   | -5087.24928   |
| <sup>5</sup> TS2 <sub>i</sub> | -5086.37727 | 1.96991  | -5084.60951 | -5087.67510 | -5087.73956   | -5087.23360   |
| <sup>5</sup> IM2 <sub>i</sub> | -5086.45495 | 1.96918  | -5084.69374 | -5087.76040 | -5087.82636   | -5087.31418   |
| <sup>5</sup> TS3 <sub>i</sub> | -5086.38570 | 1.96991  | -5084.61729 | -5087.69227 | -5087.76519   | -5087.22379   |
| <sup>5</sup> IM3 <sub>i</sub> | -5086.38570 | 1.96991  | -5084.61729 | -5087.69227 | -5087.76519   | -5087.26173   |

**Table S2: Relative (free) energies of UB3LYP/BS1 optimized geometries for the reaction pathway of  $\gamma$ -Gly-A activation by the iron(IV)-oxo species of ScoE for cycle 1 as obtained in Gaussian-09.**

|                               | BS1        |                |            | BS2        |                |            | BS2+solvent |                |            | BS3+solvent |                |            |
|-------------------------------|------------|----------------|------------|------------|----------------|------------|-------------|----------------|------------|-------------|----------------|------------|
|                               | $\Delta E$ | $\Delta E+ZPE$ | $\Delta G$ | $\Delta E$ | $\Delta E+ZPE$ | $\Delta G$ | $\Delta E$  | $\Delta E+ZPE$ | $\Delta G$ | $\Delta E$  | $\Delta E+ZPE$ | $\Delta G$ |
| <sup>5</sup> Re <sub>i</sub>  | 0.00       | 0.00           | 0.00       | 0.00       | 0.00           | 0.00       | 0.00        | 0.00           | 0.00       | 0.00        | 0.00           | 0.00       |
| <sup>3</sup> Re <sub>i</sub>  | 2.59       | 3.54           | 4.59       | 4.78       | 5.73           | 6.78       | 4.23        | 5.18           | 6.23       | 3.53        | 4.49           | 5.53       |
| <sup>5</sup> TS1 <sub>i</sub> | 9.25       | 3.57           | 1.59       | 7.57       | 1.89           | -0.09      | 14.44       | 8.76           | 6.78       | 13.91       | 8.23           | 6.25       |
| <sup>5</sup> IM1 <sub>i</sub> | -8.26      | -10.92         | -10.87     | -10.36     | -13.02         | -12.97     | -4.43       | -7.09          | -7.04      | -3.98       | -6.64          | -6.59      |
| <sup>5</sup> TS2 <sub>i</sub> | -3.03      | -4.77          | -3.16      | -3.06      | -4.80          | -3.19      | 3.33        | 1.59           | 3.19       | 5.86        | 4.12           | 5.73       |
| <sup>5</sup> IM2 <sub>i</sub> | -51.77     | -53.97         | -56.02     | -56.58     | -58.78         | -60.83     | -51.14      | -53.34         | -55.39     | -44.70      | -46.90         | -48.95     |
| <sup>5</sup> TS3 <sub>i</sub> | 12.68      | 8.40           | 9.90       | 8.78       | 4.50           | 5.99       | 12.76       | 8.48           | 9.98       | 12.01       | 7.73           | 9.23       |
| <sup>5</sup> IM3 <sub>i</sub> | -8.32      | -10.06         | -8.04      | -13.83     | -15.57         | -13.55     | -12.76      | -14.50         | -12.48     | -11.79      | -13.54         | -11.52     |

**Table S3: Group spin densities of UB3LYP/BS1 optimized geometries for the reaction pathway of  $\gamma$ -Gly-A activation by the iron(IV)-oxo species of ScoE for cycle 1 as obtained in Gaussian-09.**

|                               | Fe   | O    | Succ  | Sub   | His(ax) | Lys   | Prot  | Total |
|-------------------------------|------|------|-------|-------|---------|-------|-------|-------|
| <sup>5</sup> Re <sub>i</sub>  | 3.01 | 0.69 | 0.15  | 0.00  | -0.01   | 0.00  | 0.16  | 4.00  |
| <sup>3</sup> Re <sub>i</sub>  | 1.15 | 0.89 | -0.02 | 0.00  | -0.01   | 0.00  | -0.02 | 2.00  |
| <sup>5</sup> TS1 <sub>i</sub> | 3.81 | 0.41 | 0.15  | -0.22 | 0.03    | -0.01 | -0.16 | 4.00  |
| <sup>5</sup> IM1 <sub>i</sub> | 4.06 | 0.40 | 0.21  | -0.96 | 0.05    | 0.01  | 0.23  | 4.00  |
| <sup>5</sup> TS2 <sub>i</sub> | 2.82 | 0.02 | 0.10  | 1.00  | -0.02   | -0.02 | 0.10  | 4.00  |
| <sup>5</sup> IM2 <sub>i</sub> | 3.76 | 0.02 | 0.08  | 0.00  | 0.04    | 0.00  | 0.10  | 4.00  |
| <sup>5</sup> TS3 <sub>i</sub> | 3.91 | 0.04 | 0.24  | -0.42 | 0.05    | -0.02 | 0.20  | 4.00  |
| <sup>5</sup> IM3 <sub>i</sub> | 4.06 | 0.42 | 0.22  | -0.98 | 0.05    | -0.01 | 0.23  | 4.00  |

**Table S4: Group charges of UB3LYP/BS1 optimized geometries for the reaction pathway of  $\gamma$ -Gly-A activation by the iron(IV)-oxo species of ScoE for cycle 1 as obtained in Gaussian-09.**

|                               | Fe   | O     | Succ  | Sub   | His(ax) | Lys  | Prot | Total |
|-------------------------------|------|-------|-------|-------|---------|------|------|-------|
| <sup>5</sup> Re <sub>i</sub>  | 0.73 | -0.40 | -0.32 | -0.51 | 0.28    | 0.70 | 0.51 | 1.00  |
| <sup>3</sup> Re <sub>i</sub>  | 0.61 | -0.40 | -0.25 | -0.51 | 0.27    | 0.70 | 0.58 | 1.00  |
| <sup>5</sup> TS1 <sub>i</sub> | 0.76 | -0.70 | -0.36 | -0.25 | 0.25    | 0.49 | 0.81 | 1.00  |
| <sup>5</sup> IM1 <sub>i</sub> | 0.78 | -0.80 | -0.38 | 0.10  | 0.21    | 0.56 | 0.53 | 1.00  |
| <sup>5</sup> TS2 <sub>i</sub> | 0.69 | -0.75 | -0.34 | 0.10  | 0.27    | 0.52 | 0.50 | 1.00  |
| <sup>5</sup> IM2 <sub>i</sub> | 0.57 | -0.81 | -0.48 | 0.55  | 0.17    | 0.57 | 0.43 | 1.00  |
| <sup>5</sup> TS3 <sub>i</sub> | 0.80 | -0.69 | -0.34 | -0.10 | 0.23    | 0.58 | 0.53 | 1.00  |
| <sup>5</sup> IM3 <sub>i</sub> | 0.80 | -0.83 | -0.36 | -0.06 | 0.22    | 0.78 | 0.46 | 1.00  |

**Table S5: Absolute (free) energies of UB3LYP/BS1 optimized geometries for the reaction pathway of  $\gamma$ -Gly-A activation by the iron(IV)-oxo species of ScoE for cycle 2 as obtained in Gaussian-09.**

|                                 | E [BS1, au] | ZPE [au] | G [au]      | E [BS2, au] | E [BS2, solv] | E [BS3, solv] |
|---------------------------------|-------------|----------|-------------|-------------|---------------|---------------|
| <sup>5</sup> Re2 <sub>i</sub>   | -5085.16000 | 1.94823  | -5083.41475 | -5086.45801 | -5086.52479   | -5086.02235   |
| <sup>5</sup> TS5 <sub>i</sub>   | -5085.14073 | 1.94611  | -5083.39354 | -5086.43998 | -5086.50713   | -5086.00525   |
| <sup>5</sup> IM5 <sub>i</sub>   | -5085.16503 | 1.94693  | -5083.42008 | -5086.46716 | -5086.53360   | -5086.03194   |
| <sup>5</sup> Prod <sub>i</sub>  | -5085.22873 | 1.94320  | -5083.49690 | -5086.53701 | -5086.59841   | -5086.08614   |
| <sup>5</sup> Prod2 <sub>i</sub> | -5085.25367 | 1.95015  | -5083.50182 | -5086.55510 | -5086.62381   | -5086.11286   |

**Table S6: Relative (free) energies of UB3LYP/BS1 optimized geometries for the reaction pathway of  $\gamma$ -Gly-A activation by the iron(IV)-oxo species of ScoE for cycle 2 as obtained in Gaussian-09.**

|                                 | BS1        |                |            | BS2        |                |            | BS2+solvent |                |            | BS3+solvent |                |            |
|---------------------------------|------------|----------------|------------|------------|----------------|------------|-------------|----------------|------------|-------------|----------------|------------|
|                                 | $\Delta E$ | $\Delta E+ZPE$ | $\Delta G$ | $\Delta E$ | $\Delta E+ZPE$ | $\Delta G$ | $\Delta E$  | $\Delta E+ZPE$ | $\Delta G$ | $\Delta E$  | $\Delta E+ZPE$ | $\Delta G$ |
| <sup>5</sup> Re2 <sub>i</sub>   | 0.00       | 0.00           | 0.00       | 0.00       | 0.00           | 0.00       | 0.00        | 0.00           | 0.00       | 0.00        | 0.00           | 0.00       |
| <sup>5</sup> TS5 <sub>i</sub>   | 12.09      | 10.76          | 13.31      | 11.31      | 9.98           | 12.52      | 11.09       | 9.76           | 12.30      | 10.73       | 9.40           | 11.94      |
| <sup>5</sup> IM5 <sub>i</sub>   | -3.16      | -3.98          | -3.35      | -5.74      | -6.56          | -5.93      | -5.53       | -6.34          | -5.71      | -6.02       | -6.83          | -6.20      |
| <sup>5</sup> Prod <sub>i</sub>  | -43.13     | -46.29         | -51.55     | -49.57     | -52.73         | -58.00     | -46.20      | -49.35         | -54.62     | -40.03      | -43.19         | -48.45     |
| <sup>5</sup> Prod2 <sub>i</sub> | -58.78     | -57.57         | -54.64     | -60.93     | -59.72         | -56.79     | -62.14      | -60.93         | -57.99     | -56.80      | -55.59         | -52.65     |

**Table S7: Group spin densities of UB3LYP/BS1 optimized geometries for the reaction pathway of  $\gamma$ -Gly-A activation by the iron(IV)-oxo species of ScoE for cycle 2 as obtained in Gaussian-09.**

|                                 | Fe   | O    | Succ | Sub   | His(ax) | Lys  | Prot | Total |
|---------------------------------|------|------|------|-------|---------|------|------|-------|
| <sup>5</sup> Re2 <sub>i</sub>   | 3.02 | 0.68 | 0.14 | 0.00  | -0.01   | 0.00 | 0.17 | 4.00  |
| <sup>5</sup> TS5 <sub>i</sub>   | 3.74 | 0.29 | 0.15 | -0.40 | 0.03    | 0.01 | 0.17 | 4.00  |
| <sup>5</sup> IM5 <sub>i</sub>   | 4.08 | 0.29 | 0.23 | -0.95 | 0.07    | 0.00 | 0.28 | 4.00  |
| <sup>5</sup> Prod <sub>i</sub>  | 3.76 | 0.03 | 0.07 | 0.00  | 0.04    | 0.00 | 0.10 | 4.00  |
| <sup>5</sup> Prod2 <sub>i</sub> | 3.76 | 0.01 | 0.07 | 0.00  | 0.05    | 0.00 | 0.11 | 4.00  |

**Table S8: Group charges of UB3LYP/BS1 optimized geometries for the reaction pathway of  $\gamma$ -Gly-A activation by the iron(IV)-oxo species of ScoE for cycle 2 as obtained in Gaussian-09.**

|                                 | Fe   | O     | Succ  | Sub   | His(ax) | Lys  | Prot | Total |
|---------------------------------|------|-------|-------|-------|---------|------|------|-------|
| <sup>5</sup> Re2 <sub>i</sub>   | 0.72 | -0.41 | -0.35 | -0.36 | 0.27    | 0.55 | 0.58 | 1.00  |
| <sup>5</sup> TS5 <sub>i</sub>   | 0.74 | -0.59 | -0.38 | -0.32 | 0.24    | 0.73 | 0.58 | 1.00  |
| <sup>5</sup> IM5 <sub>i</sub>   | 0.81 | -0.81 | -0.37 | -0.14 | 0.22    | 0.72 | 0.56 | 1.00  |
| <sup>5</sup> Prod <sub>i</sub>  | 0.58 | -0.80 | -0.48 | 0.51  | 0.16    | 0.54 | 0.48 | 1.00  |
| <sup>5</sup> Prod2 <sub>i</sub> | 0.63 | -0.64 | -0.50 | 0.10  | 0.19    | 0.74 | 0.49 | 1.00  |



## Cartesian coordinates of optimized geometries

### $\gamma$ -Gly-A:

|   |              |              |              |
|---|--------------|--------------|--------------|
| 7 | -2.092202000 | 1.366153000  | 0.202312000  |
| 6 | 1.905450000  | -0.634697000 | 0.420144000  |
| 6 | 0.752069000  | 0.367359000  | 0.051066000  |
| 6 | -0.490292000 | -0.523282000 | -0.334816000 |
| 6 | 1.118068000  | -1.801171000 | 1.047884000  |
| 6 | -0.126973000 | -1.962974000 | 0.158693000  |
| 6 | 2.659512000  | -1.145827000 | -0.839978000 |
| 6 | 1.192347000  | 1.378565000  | -0.997684000 |
| 6 | -1.854602000 | -0.072260000 | 0.276001000  |
| 6 | 2.896147000  | -0.004466000 | 1.410835000  |
| 6 | 3.082766000  | -0.041170000 | -1.817932000 |
| 6 | 1.861005000  | 0.801221000  | -2.226541000 |
| 6 | -3.025580000 | -0.877150000 | -0.387288000 |
| 6 | 1.089378000  | 2.702563000  | -0.809906000 |
| 6 | -4.313192000 | -0.846189000 | 0.454360000  |
| 6 | -3.330474000 | -0.407835000 | -1.819148000 |
| 6 | -2.828807000 | 1.964755000  | 1.328285000  |
| 1 | 0.500797000  | 0.921581000  | 0.963940000  |
| 1 | -0.592489000 | -0.527299000 | -1.426189000 |
| 1 | 0.813651000  | -1.523629000 | 2.066955000  |
| 1 | 1.714762000  | -2.721917000 | 1.125936000  |
| 1 | 0.086649000  | -2.626207000 | -0.689696000 |
| 1 | -0.950911000 | -2.428197000 | 0.711005000  |
| 1 | 2.018211000  | -1.849319000 | -1.388913000 |
| 1 | 3.536788000  | -1.724385000 | -0.512522000 |
| 1 | -1.823592000 | -0.389842000 | 1.341288000  |
| 1 | 2.377293000  | 0.331510000  | 2.316590000  |
| 1 | 3.398765000  | 0.870930000  | 0.983233000  |
| 1 | 3.668861000  | -0.728324000 | 1.707679000  |
| 1 | 3.554898000  | -0.490581000 | -2.704264000 |
| 1 | 3.833762000  | 0.615047000  | -1.356764000 |
| 1 | 1.161639000  | 0.153010000  | -2.780089000 |
| 1 | 2.155764000  | 1.607425000  | -2.910266000 |
| 1 | -2.708065000 | -1.930023000 | -0.437919000 |
| 1 | 0.629281000  | 3.127837000  | 0.081162000  |
| 1 | 1.436198000  | 3.394985000  | -1.578219000 |
| 1 | -5.071580000 | -1.515032000 | 0.022764000  |
| 1 | -4.127286000 | -1.169549000 | 1.486889000  |
| 1 | -4.738390000 | 0.162148000  | 0.494396000  |
| 1 | -4.155392000 | -0.994414000 | -2.248053000 |
| 1 | -2.466450000 | -0.516720000 | -2.486241000 |
| 1 | -3.610199000 | 0.650531000  | -1.815190000 |
| 6 | -2.028677000 | 3.097510000  | 2.061143000  |
| 1 | -1.210365000 | 1.876819000  | 0.191413000  |
| 1 | -3.789014000 | 2.387371000  | 1.002728000  |
| 1 | -3.064034000 | 1.206957000  | 2.091864000  |
| 8 | -2.678575000 | 3.732449000  | 2.924585000  |
| 8 | -0.816922000 | 3.230730000  | 1.717466000  |

### $\gamma$ -Gly-B:

|   |               |              |              |
|---|---------------|--------------|--------------|
| 1 | 2.592910000   | -0.932888000 | -0.186374000 |
| 8 | 2.249974000   | -0.030025000 | -0.272081000 |
| 6 | 0.869788000   | -0.070831000 | -0.257209000 |
| 6 | 0.153369000   | -1.263834000 | -0.136857000 |
| 6 | -1.241804000  | -1.239123000 | -0.130987000 |
| 6 | -1.962572000  | -0.033416000 | -0.239091000 |
| 6 | -1.209102000  | 1.153471000  | -0.368742000 |
| 6 | 0.182753000   | 1.142049000  | -0.375561000 |
| 6 | -3.427122000  | -0.085632000 | -0.214752000 |
| 6 | -4.272351000  | 0.969503000  | -0.137871000 |
| 6 | -5.739949000  | 0.882118000  | -0.126950000 |
| 6 | -6.436736000  | 2.005148000  | 0.265833000  |
| 6 | -7.861782000  | 2.300099000  | 0.200452000  |
| 6 | -8.365711000  | 3.418125000  | 0.902295000  |
| 6 | -9.704135000  | 3.803001000  | 0.823052000  |
| 6 | -10.590304000 | 3.076204000  | 0.023479000  |
| 6 | -10.122796000 | 1.973283000  | -0.695420000 |
| 6 | -8.786632000  | 1.590658000  | -0.604331000 |
| 8 | -11.929503000 | 3.408251000  | -0.094006000 |
| 1 | -12.117560000 | 4.159536000  | 0.488847000  |
| 7 | -6.318336000  | -0.314867000 | -0.509029000 |
| 1 | -5.828895000  | 2.818292000  | 0.659730000  |
| 1 | -3.847033000  | -1.092161000 | -0.221011000 |
| 6 | -7.218527000  | -1.076575000 | -0.370860000 |
| 1 | -5.649032000  | -1.007509000 | -0.853086000 |
| 6 | -6.682252000  | -2.547363000 | 0.535782000  |
| 1 | -8.239531000  | -1.131330000 | -0.027890000 |
| 1 | -7.282937000  | -0.603865000 | 1.357708000  |
| 8 | -7.377752000  | -3.278383000 | 1.273589000  |
| 8 | -5.619228000  | -2.817681000 | -0.098300000 |
| 1 | -3.873064000  | 1.980591000  | -0.061680000 |
| 1 | 0.750034000   | 2.063117000  | -0.479229000 |
| 1 | -1.721011000  | 2.105780000  | -0.476722000 |
| 1 | -1.792438000  | -2.171905000 | -0.035191000 |
| 1 | 0.680500000   | -2.213579000 | -0.047671000 |
| 1 | -8.436143000  | 0.741988000  | -1.179538000 |
| 1 | -10.816420000 | 1.416997000  | -1.320411000 |
| 1 | -7.687538000  | 3.997045000  | 1.526748000  |
| 1 | -10.056249000 | 4.668549000  | 1.385345000  |

|                   |              |              |              |   |              |              |              |
|-------------------|--------------|--------------|--------------|---|--------------|--------------|--------------|
| <sup>5</sup> Rei: |              |              |              | 6 | 4.849835000  | -4.134788000 | -1.319888000 |
| 26                | 2.599402000  | -3.002737000 | 0.601966000  | 6 | 7.036955000  | -5.116633000 | -2.373495000 |
| 8                 | 3.633968000  | -2.180794000 | 2.079517000  | 1 | 7.425747000  | -6.101797000 | -2.087757000 |
| 6                 | 3.233544000  | -2.119181000 | 3.333206000  | 1 | 6.467491000  | -5.240456000 | -3.298202000 |
| 8                 | 2.298332000  | -2.750055000 | 3.811996000  | 1 | 4.133081000  | -4.178268000 | -2.123770000 |
| 6                 | 4.083287000  | -1.196313000 | 4.217123000  | 1 | 7.521099000  | -4.473686000 | -0.339040000 |
| 6                 | 4.328374000  | 0.204487000  | 3.643530000  | 1 | 5.627006000  | -3.473915000 | 1.727724000  |
| 7                 | 5.198381000  | 0.162530000  | 2.470254000  | 1 | 7.894005000  | -4.468266000 | -2.593858000 |
| 6                 | 5.786819000  | 1.283790000  | 1.984216000  | 8 | 2.177652000  | -5.023757000 | 0.909817000  |
| 8                 | 5.682048000  | 2.391153000  | 2.508301000  | 6 | 1.787400000  | -5.196370000 | -0.292111000 |
| 6                 | 6.606082000  | 1.111519000  | 0.698184000  | 8 | 1.835975000  | -4.223023000 | -1.102900000 |
| 7                 | 5.979793000  | 1.905156000  | -0.351365000 | 6 | 1.249842000  | -6.539979000 | -0.719693000 |
| 1                 | 5.049620000  | -1.685466000 | 4.402501000  | 1 | 0.173199000  | -6.571046000 | -0.513650000 |
| 1                 | 3.572019000  | -1.109409000 | 5.178885000  | 1 | 1.396066000  | -6.687214000 | -1.792040000 |
| 1                 | 3.370705000  | 0.684184000  | 3.395291000  | 1 | 1.727290000  | -7.342911000 | -0.153418000 |
| 1                 | 5.116940000  | -0.671002000 | 1.897947000  | 7 | -0.599160000 | -2.387777000 | 3.651726000  |
| 1                 | 4.810566000  | 0.838745000  | 4.392142000  | 6 | -1.587146000 | -3.278080000 | 3.581960000  |
| 1                 | 6.656966000  | 0.080690000  | 0.343059000  | 7 | -2.844625000 | -2.859889000 | 3.380840000  |
| 1                 | 5.687073000  | 2.846122000  | -0.103162000 | 7 | -1.347155000 | -4.595852000 | 3.748075000  |
| 1                 | 7.626254000  | 1.461611000  | 0.896979000  | 6 | -0.007666000 | -5.180752000 | 3.880220000  |
| 6                 | 5.726936000  | 1.410051000  | -1.582742000 | 6 | -0.113876000 | -6.642905000 | 4.303353000  |
| 8                 | 6.144342000  | 0.324892000  | -1.990926000 | 1 | -0.624477000 | -6.742643000 | 5.267426000  |
| 6                 | 4.760933000  | 2.245064000  | -2.443422000 | 1 | 0.887568000  | -7.072842000 | 4.399386000  |
| 6                 | 3.306074000  | 2.106183000  | -1.881864000 | 1 | 0.546847000  | -4.613485000 | 4.634049000  |
| 6                 | 2.908575000  | 0.684333000  | -1.635667000 | 1 | 0.546197000  | -5.092820000 | 2.937392000  |
| 6                 | 2.946798000  | -0.066968000 | -0.480978000 | 1 | -2.117651000 | -5.226607000 | 3.559007000  |
| 7                 | 2.588227000  | -0.217031000 | -2.638934000 | 1 | -1.402277000 | -1.402277000 | 3.424428000  |
| 6                 | 2.462328000  | -1.442159000 | -2.083995000 | 1 | 0.375674000  | -2.675707000 | 3.586877000  |
| 7                 | 2.679401000  | -1.383532000 | -0.777457000 | 1 | -3.619866000 | -3.507589000 | 3.433244000  |
| 1                 | 5.026589000  | 3.307607000  | -2.427777000 | 1 | -3.047779000 | -1.856858000 | 3.237653000  |
| 1                 | 3.247369000  | 2.664926000  | -0.943258000 | 1 | -0.659873000 | -7.236390000 | 3.559713000  |
| 1                 | 2.639106000  | 2.598087000  | -2.595966000 | 8 | 1.136676000  | -2.537308000 | 1.117988000  |
| 1                 | 3.183335000  | 0.245456000  | 0.524739000  | 6 | -4.925718000 | -6.296616000 | 5.964122000  |
| 1                 | 2.472770000  | -0.006809000 | -3.638010000 | 6 | -4.916318000 | -6.032636000 | 4.476175000  |
| 1                 | 2.187895000  | -2.335231000 | -2.624212000 | 6 | -4.186142000 | -6.851866000 | 3.600566000  |
| 7                 | 4.862549000  | 1.722667000  | -3.791911000 | 6 | -5.667307000 | -4.981777000 | 3.926036000  |
| 6                 | 4.218448000  | 2.258114000  | -4.853256000 | 6 | -4.210891000 | -6.632621000 | 2.218616000  |
| 8                 | 3.547327000  | 3.287674000  | -4.803723000 | 6 | -5.698849000 | -4.759737000 | 2.545588000  |
| 6                 | 4.392767000  | 1.475226000  | -6.168101000 | 6 | -4.967506000 | -5.585623000 | 1.686869000  |
| 7                 | 3.160796000  | 1.427536000  | -6.931102000 | 1 | -5.014713000 | -5.367526000 | 6.236807000  |
| 1                 | 5.360768000  | 0.838550000  | -3.850894000 | 1 | -4.015193000 | -6.810933000 | 6.588866000  |
| 1                 | 4.740555000  | 0.455831000  | -5.970691000 | 1 | -3.608564000 | -7.681047000 | 4.004211000  |
| 1                 | 5.149441000  | 1.978296000  | -6.777196000 | 1 | -6.242312000 | -4.330154000 | 4.579184000  |
| 1                 | 3.074124000  | 2.019321000  | -7.744723000 | 1 | -3.646599000 | -7.287413000 | 1.559210000  |
| 6                 | 2.052155000  | 0.809687000  | -6.445325000 | 1 | -6.293101000 | -3.940702000 | 2.149726000  |
| 8                 | 2.074798000  | 0.187727000  | -5.377624000 | 1 | -4.991105000 | -5.416638000 | 0.613980000  |
| 6                 | 0.796927000  | 0.929190000  | -7.293012000 | 1 | -5.775953000 | -6.932524000 | 6.243318000  |
| 6                 | 0.065124000  | 2.289790000  | -7.121999000 | 6 | -8.677442000 | 2.261657000  | -4.310853000 |
| 1                 | 1.058047000  | 0.801121000  | -8.350988000 | 6 | -7.532114000 | 2.648386000  | -3.403124000 |
| 1                 | 0.133564000  | 0.108861000  | -7.007609000 | 6 | -6.814923000 | 3.833820000  | -3.600670000 |
| 1                 | 0.770712000  | 3.106868000  | -7.316812000 | 6 | -7.169020000 | 1.843039000  | -2.312565000 |
| 1                 | -0.698028000 | 2.345026000  | -7.906607000 | 6 | -5.772295000 | 4.206981000  | -2.749246000 |
| 6                 | -0.593805000 | 2.497586000  | -5.772918000 | 6 | -6.138063000 | 2.200087000  | -1.445277000 |
| 6                 | 0.094204000  | 3.113261000  | -4.717561000 | 6 | -5.434893000 | 3.389114000  | -1.667771000 |
| 6                 | -1.924237000 | 2.102931000  | -5.570686000 | 8 | -4.401834000 | 3.691474000  | -0.807602000 |
| 6                 | -0.544522000 | 3.341995000  | -3.495376000 | 1 | -8.649083000 | 2.820911000  | -5.251872000 |
| 6                 | -2.564905000 | 2.330625000  | -4.352423000 | 1 | -9.648663000 | 2.464059000  | -3.840240000 |
| 6                 | -1.877856000 | 2.959843000  | -3.308325000 | 1 | -7.070249000 | 4.481608000  | -4.436186000 |
| 1                 | 1.124478000  | 3.431583000  | -4.858294000 | 1 | -7.712955000 | 0.919055000  | -2.127856000 |
| 1                 | -2.473498000 | 1.636255000  | -6.385727000 | 1 | -5.222526000 | 5.128231000  | -2.929308000 |
| 1                 | -0.009055000 | 3.858510000  | -2.701266000 | 1 | -5.889526000 | 1.579982000  | -0.588332000 |
| 1                 | -3.607094000 | 2.052827000  | -4.223767000 | 1 | -4.188537000 | 4.643008000  | -0.855519000 |
| 1                 | -2.402010000 | 3.189496000  | -2.383210000 | 1 | -8.655977000 | 1.193113000  | -4.554603000 |
| 7                 | 4.495919000  | -3.651528000 | -0.073368000 | 6 | -9.900179000 | -2.664415000 | 4.254141000  |
| 6                 | 5.570619000  | -3.758797000 | 0.689807000  | 6 | -8.762108000 | -1.991192000 | 3.520933000  |
| 7                 | 6.595289000  | -4.286395000 | -0.020565000 | 6 | -7.600330000 | -1.582902000 | 4.187400000  |
| 6                 | 6.159990000  | -4.536169000 | -1.313833000 | 6 | -8.843679000 | -1.726214000 | 2.144963000  |

|   |               |              |              |                   |              |              |              |
|---|---------------|--------------|--------------|-------------------|--------------|--------------|--------------|
| 6 | -6.558548000  | -0.932652000 | 3.521219000  | 1                 | -0.651220000 | 2.317882000  | 2.014414000  |
| 6 | -7.816375000  | -1.078245000 | 1.462939000  | 1                 | -0.495304000 | 4.082678000  | 0.378151000  |
| 6 | -6.662453000  | -0.673038000 | 2.147796000  | 6                 | -0.883305000 | 7.300279000  | 2.082446000  |
| 8 | -5.683381000  | -0.026881000 | 1.449447000  | 6                 | -2.032047000 | 6.394367000  | 1.517239000  |
| 1 | -9.581744000  | -3.033661000 | 5.234846000  | 6                 | -1.699549000 | 4.914369000  | 1.985573000  |
| 1 | -10.297345000 | -3.516009000 | 3.689164000  | 6                 | -0.463975000 | 6.535006000  | 3.358743000  |
| 1 | -7.508651000  | -1.762326000 | 5.257125000  | 6                 | -0.513074000 | 5.046797000  | 2.976597000  |
| 1 | -9.731601000  | -2.031815000 | 1.595057000  | 6                 | 0.306048000  | 7.384055000  | 1.091512000  |
| 1 | -5.669249000  | -0.618154000 | 4.060229000  | 6                 | -2.325824000 | 6.640604000  | 0.047280000  |
| 1 | -7.894245000  | -0.877238000 | 0.398195000  | 6                 | -1.398608000 | 8.710176000  | 2.413522000  |
| 1 | -4.853429000  | 0.013697000  | 1.998260000  | 6                 | -0.109003000 | 7.768721000  | -0.333983000 |
| 1 | -10.736710000 | -1.973166000 | 4.422765000  | 6                 | -1.141907000 | 6.769565000  | -0.887814000 |
| 6 | -4.535135000  | -1.430730000 | -1.966830000 | 6                 | -3.581774000 | 6.842068000  | -0.386014000 |
| 6 | -3.120150000  | -0.841104000 | -1.927519000 | 1                 | -2.941968000 | 6.667206000  | 2.062734000  |
| 6 | -2.451725000  | -1.061963000 | -0.562984000 | 1                 | 0.425076000  | 4.749176000  | 2.487036000  |
| 6 | -0.972309000  | -0.699234000 | -0.483810000 | 1                 | -0.625793000 | 4.398780000  | 3.852728000  |
| 7 | -0.692700000  | 0.771242000  | -0.708724000 | 1                 | -2.216660000 | 8.662931000  | 3.142118000  |
| 1 | -5.146371000  | -1.025853000 | -1.152978000 | 1                 | -1.779841000 | 9.229393000  | 1.527458000  |
| 1 | -4.505728000  | -2.521315000 | -1.852938000 | 1                 | -0.601591000 | 9.327367000  | 2.845596000  |
| 1 | -3.179963000  | 0.232445000  | -2.155691000 | 1                 | 0.771357000  | 7.792399000  | -0.988833000 |
| 1 | -2.505237000  | -1.293387000 | -2.719485000 | 1                 | -0.534675000 | 8.779393000  | -0.350154000 |
| 1 | -3.020494000  | -0.550875000 | 0.220766000  | 1                 | -0.646405000 | 5.793991000  | -1.003959000 |
| 1 | -2.502342000  | -2.128826000 | -0.306909000 | 1                 | -1.480089000 | 7.070131000  | -1.886003000 |
| 1 | -0.399991000  | -1.246422000 | -1.237728000 | 1                 | -3.790182000 | 7.097514000  | -1.423840000 |
| 1 | -0.556088000  | -0.936177000 | 0.495266000  | 1                 | -2.586347000 | 4.585452000  | 2.536194000  |
| 1 | -1.117558000  | 1.115949000  | -1.578136000 | 1                 | -4.431451000 | 6.814352000  | 0.293036000  |
| 1 | 0.321413000   | 0.900564000  | -0.802425000 | 1                 | 0.518253000  | 6.848390000  | 3.732428000  |
| 1 | -1.016727000  | 1.438140000  | 0.134417000  | 1                 | 0.823080000  | 6.414476000  | 1.050246000  |
| 1 | -5.033930000  | -1.204933000 | -2.915255000 | 1                 | 1.040619000  | 8.101930000  | 1.478714000  |
| 6 | -5.802672000  | 7.672461000  | 4.250061000  | 1                 | -1.191191000 | 6.736726000  | 4.156354000  |
| 6 | -5.828099000  | 6.249590000  | 3.738891000  | 1                 | -2.238786000 | 3.930629000  | 0.125061000  |
| 6 | -5.324833000  | 5.195266000  | 4.513652000  |                   |              |              |              |
| 6 | -6.393856000  | 5.942198000  | 2.491653000  |                   |              |              |              |
| 6 | -5.396961000  | 3.873697000  | 4.064140000  | <sup>3</sup> Rei: |              |              |              |
| 6 | -6.459478000  | 4.624473000  | 2.034104000  | 26                | 2.580929000  | -3.046068000 | 0.401482000  |
| 6 | -5.964440000  | 3.581583000  | 2.821339000  | 8                 | 3.533598000  | -2.098143000 | 1.796324000  |
| 1 | -5.685995000  | 8.393276000  | 3.433178000  | 6                 | 3.211997000  | -2.188803000 | 3.066842000  |
| 1 | -4.985390000  | 7.830404000  | 4.962090000  | 8                 | 2.278566000  | -2.829290000 | 3.538304000  |
| 1 | -4.886112000  | 5.410287000  | 5.485901000  | 6                 | 4.154923000  | -1.409243000 | 3.997671000  |
| 1 | -6.799716000  | 6.745611000  | 1.879504000  | 6                 | 4.486963000  | 0.019026000  | 3.552712000  |
| 1 | -5.017615000  | 3.069826000  | 4.690628000  | 7                 | 5.337745000  | 0.034869000  | 2.364773000  |
| 1 | -6.902919000  | 4.407623000  | 1.066169000  | 6                 | 6.004849000  | 1.156064000  | 1.988883000  |
| 1 | -6.021431000  | 2.555544000  | 2.468560000  | 8                 | 6.007290000  | 2.198461000  | 2.639812000  |
| 1 | -6.736974000  | 7.923169000  | 4.769759000  | 6                 | 6.764882000  | 1.069413000  | 0.657779000  |
| 6 | 3.763972000   | 6.511506000  | -2.963973000 | 7                 | 6.042868000  | 1.844495000  | -0.344967000 |
| 6 | 4.506600000   | 6.085755000  | -1.718203000 | 1                 | 5.087281000  | -1.980837000 | 4.108306000  |
| 6 | 3.818677000   | 5.617663000  | -0.587994000 | 1                 | 3.677413000  | -1.379412000 | 4.980210000  |
| 6 | 5.909144000   | 6.113920000  | -1.670824000 | 1                 | 3.560489000  | 0.582726000  | 3.370295000  |
| 6 | 4.506427000   | 5.175899000  | 0.546092000  | 1                 | 5.167840000  | -0.710738000 | 1.698610000  |
| 6 | 6.602426000   | 5.680077000  | -0.538635000 | 1                 | 5.021926000  | 0.546846000  | 4.346568000  |
| 6 | 5.904845000   | 5.204613000  | 0.575970000  | 1                 | 6.860679000  | 0.052371000  | 0.273710000  |
| 1 | 2.762715000   | 6.886486000  | -2.724674000 | 1                 | 5.760863000  | 2.786569000  | -0.088536000 |
| 1 | 4.300422000   | 7.302820000  | -3.498173000 | 1                 | 7.767533000  | 1.481585000  | 0.817647000  |
| 1 | 2.730327000   | 5.608325000  | -0.595430000 | 6                 | 5.755231000  | 1.357263000  | -1.571812000 |
| 1 | 6.462400000   | 6.486787000  | -2.529880000 | 8                 | 6.168534000  | 0.280013000  | -2.004470000 |
| 1 | 3.960671000   | 4.816050000  | 1.414333000  | 6                 | 4.763396000  | 2.196650000  | -2.398064000 |
| 1 | 7.688494000   | 5.719601000  | -0.524443000 | 6                 | 3.319216000  | 2.036052000  | -1.817427000 |
| 1 | 6.431018000   | 4.851511000  | 1.457510000  | 6                 | 2.930722000  | 0.607155000  | -1.600466000 |
| 1 | 3.645555000   | 5.666937000  | -3.655736000 | 6                 | 2.969422000  | -0.164163000 | -0.460003000 |
| 8 | -1.159028000  | 0.265593000  | 2.786282000  | 7                 | 2.616132000  | -0.274224000 | -2.623862000 |
| 6 | -2.356824000  | 0.566411000  | 2.566091000  | 6                 | 2.489996000  | -1.509361000 | -2.095345000 |
| 8 | -3.376239000  | -0.146573000 | 2.825132000  | 7                 | 2.705375000  | -1.472177000 | -0.786915000 |
| 6 | -2.630305000  | 1.937723000  | 1.929723000  | 1                 | 5.019966000  | 3.261106000  | -2.367130000 |
| 7 | -1.393386000  | 2.466394000  | 1.327568000  | 1                 | 3.272367000  | 2.570176000  | -0.863868000 |
| 6 | -1.450540000  | 3.876980000  | 0.879309000  | 1                 | 2.640001000  | 2.543036000  | -2.509618000 |
| 1 | -3.036146000  | 2.592053000  | 2.712527000  | 1                 | 3.191053000  | 0.121103000  | 0.555367000  |
| 1 | -3.404273000  | 1.866562000  | 1.159463000  | 1                 | 2.504671000  | -0.045759000 | -3.619472000 |
|   |               |              |              | 1                 | 2.221847000  | -2.391898000 | -2.655753000 |

|   |              |              |              |   |               |              |              |
|---|--------------|--------------|--------------|---|---------------|--------------|--------------|
| 7 | 4.848919000  | 1.701857000  | -3.757910000 | 6 | -5.690867000  | -4.920104000 | 4.046802000  |
| 6 | 4.194687000  | 2.260470000  | -4.800980000 | 6 | -4.287257000  | -6.621982000 | 2.345635000  |
| 8 | 3.518179000  | 3.284412000  | -4.719905000 | 6 | -5.752061000  | -4.729471000 | 2.662685000  |
| 6 | 4.368704000  | 1.513425000  | -6.136183000 | 6 | -5.047273000  | -5.580900000 | 1.807064000  |
| 7 | 3.130151000  | 1.457273000  | -6.887771000 | 1 | -4.986157000  | -5.252020000 | 6.650687000  |
| 1 | 5.355567000  | 0.824730000  | -3.842808000 | 1 | -3.998253000  | -6.705208000 | 6.413874000  |
| 1 | 4.741597000  | 0.497498000  | -5.967854000 | 1 | -3.653111000  | -7.634755000 | 4.140856000  |
| 1 | 5.107222000  | 2.048250000  | -6.740416000 | 1 | -6.245612000  | -4.249007000 | 4.697870000  |
| 1 | 3.030832000  | 2.047563000  | -7.700974000 | 1 | -3.743605000  | -7.296485000 | 1.688730000  |
| 6 | 2.039303000  | 0.803695000  | -6.409751000 | 1 | -6.347230000  | -3.913708000 | 2.261610000  |
| 8 | 2.078514000  | 0.170874000  | -5.348685000 | 1 | -5.093060000  | -5.435690000 | 0.731478000  |
| 6 | 0.783689000  | 0.891901000  | -7.261428000 | 1 | -5.760042000  | -6.819735000 | 6.410026000  |
| 6 | 0.041724000  | 2.251649000  | -7.137400000 | 6 | -8.650481000  | 2.257205000  | -4.418485000 |
| 1 | 1.049321000  | 0.730999000  | -8.313941000 | 6 | -7.524958000  | 2.653700000  | -3.490422000 |
| 1 | 0.125341000  | 0.076443000  | -6.951857000 | 6 | -6.832382000  | 3.858112000  | -3.659366000 |
| 1 | 0.740338000  | 3.068113000  | -7.358839000 | 6 | -7.157614000  | 1.838858000  | -2.408346000 |
| 1 | -0.720759000 | 2.275207000  | -7.924125000 | 6 | -5.809162000  | 4.240421000  | -2.788710000 |
| 6 | -0.620007000 | 2.497587000  | -5.796071000 | 6 | -6.145938000  | 2.204707000  | -1.522059000 |
| 6 | 0.070599000  | 3.128912000  | -4.751533000 | 6 | -5.466519000  | 3.412390000  | -1.716575000 |
| 6 | -1.954685000 | 2.119669000  | -5.590375000 | 8 | -4.450499000  | 3.722364000  | -0.839476000 |
| 6 | -0.570480000 | 3.389851000  | -3.537124000 | 1 | -8.611706000  | 2.818576000  | -5.357900000 |
| 6 | -2.597556000 | 2.378997000  | -4.379585000 | 1 | -9.631670000  | 2.449138000  | -3.964364000 |
| 6 | -1.908129000 | 3.024141000  | -3.346916000 | 1 | -7.091862000  | 4.513764000  | -4.487446000 |
| 1 | 1.104902000  | 3.433614000  | -4.892814000 | 1 | -7.683141000  | 0.900323000  | -2.245206000 |
| 1 | -2.505212000 | 1.640471000  | -6.397224000 | 1 | -5.278157000  | 5.176602000  | -2.946903000 |
| 1 | -0.032620000 | 3.917788000  | -2.752199000 | 1 | -5.895745000  | 1.577395000  | -0.670828000 |
| 1 | -3.642319000 | 2.112518000  | -4.248595000 | 1 | -4.251378000  | 4.677573000  | -0.874289000 |
| 1 | -2.432519000 | 3.276380000  | -2.427902000 | 1 | -8.614030000  | 1.189431000  | -4.663458000 |
| 7 | 4.549317000  | -3.623953000 | -0.254467000 | 6 | -9.934322000  | -2.494883000 | 4.363537000  |
| 6 | 5.633854000  | -3.615260000 | 0.498461000  | 6 | -8.797327000  | -1.863531000 | 3.592513000  |
| 7 | 6.692830000  | -4.101534000 | -0.195276000 | 6 | -7.606646000  | -1.482315000 | 4.222697000  |
| 6 | 6.267652000  | -4.446374000 | -1.468759000 | 6 | -8.907808000  | -1.612738000 | 2.215801000  |
| 6 | 4.930478000  | -4.142058000 | -1.477727000 | 6 | -6.564077000  | -0.871803000 | 3.520836000  |
| 6 | 7.176492000  | -5.013859000 | -2.508650000 | 6 | -7.880534000  | -1.004209000 | 1.498651000  |
| 1 | 7.634358000  | -5.955842000 | -2.182138000 | 6 | -6.697074000  | -0.625763000 | 2.147513000  |
| 1 | 6.612063000  | -5.219039000 | -3.422009000 | 8 | -5.718492000  | -0.017365000 | 1.415197000  |
| 1 | 4.216170000  | -4.276002000 | -2.274904000 | 1 | -9.607819000  | -2.832091000 | 5.353031000  |
| 1 | 7.632348000  | -4.202949000 | 0.162926000  | 1 | -10.349383000 | -3.361669000 | 3.835421000  |
| 1 | 5.677794000  | -3.281876000 | 1.522439000  | 1 | -7.491704000  | -1.651460000 | 5.291866000  |
| 1 | 7.985876000  | -4.319422000 | -2.765981000 | 1 | -9.818842000  | -1.898062000 | 1.693475000  |
| 8 | 2.433297000  | -4.950626000 | 1.081575000  | 1 | -5.651542000  | -0.577931000 | 4.031890000  |
| 6 | 2.025756000  | -5.290581000 | -0.071794000 | 1 | -7.980820000  | -0.813205000 | 0.433955000  |
| 8 | 1.962709000  | -4.369751000 | -0.962681000 | 1 | -4.875171000  | 0.011546000  | 1.944159000  |
| 6 | 1.609884000  | -6.698742000 | -0.385788000 | 1 | -10.760156000 | -1.787443000 | 4.516711000  |
| 1 | 0.515663000  | -6.762945000 | -0.356601000 | 6 | -4.589944000  | -1.396185000 | -1.973693000 |
| 1 | 1.932823000  | -6.972372000 | -1.393855000 | 6 | -3.196616000  | -0.756309000 | -1.955277000 |
| 1 | 2.023795000  | -7.391758000 | 0.349380000  | 6 | -2.454518000  | -1.049271000 | -0.643476000 |
| 7 | -0.585773000 | -2.401500000 | 3.507590000  | 6 | -0.981088000  | -0.656278000 | -0.611186000 |
| 6 | -1.584215000 | -3.281301000 | 3.510257000  | 7 | -0.739242000  | 0.826996000  | -0.793872000 |
| 7 | -2.845969000 | -2.860719000 | 3.341903000  | 1 | -5.176271000  | -1.071500000 | -1.107056000 |
| 7 | -1.348637000 | -4.594693000 | 3.715418000  | 1 | -4.517050000  | -2.490153000 | -1.939873000 |
| 6 | -0.012299000 | -5.175258000 | 3.882883000  | 1 | -3.308006000  | 0.327894000  | -2.096950000 |
| 6 | -0.124064000 | -6.622410000 | 4.353350000  | 1 | -2.605782000  | -1.123445000 | -2.807554000 |
| 1 | -0.647145000 | -6.689780000 | 5.313586000  | 1 | -2.993558000  | -0.604888000 | 0.199424000  |
| 1 | 0.875803000  | -7.048712000 | 4.478017000  | 1 | -2.466641000  | -2.131601000 | -0.456881000 |
| 1 | 0.534536000  | -4.580782000 | 4.621405000  | 1 | -0.431821000  | -1.160273000 | -1.411555000 |
| 1 | 0.555850000  | -5.116346000 | 2.946625000  | 1 | -0.518334000  | -0.926335000 | 0.338100000  |
| 1 | -2.125991000 | -5.227926000 | 3.568813000  | 1 | -1.184175000  | 1.186530000  | -1.647343000 |
| 1 | -0.795521000 | -1.417541000 | 3.280550000  | 1 | 0.269441000   | 0.979990000  | -0.900914000 |
| 1 | 0.382463000  | -2.700622000 | 3.388075000  | 1 | -1.060111000  | 1.470561000  | 0.068238000  |
| 1 | -3.623391000 | -3.493318000 | 3.477836000  | 1 | -5.140052000  | -1.123017000 | -2.880388000 |
| 1 | -3.047090000 | -1.862275000 | 3.168430000  | 6 | -5.876933000  | 7.659350000  | 4.248140000  |
| 1 | -0.661249000 | -7.241214000 | 3.623849000  | 6 | -5.891291000  | 6.244512000  | 3.714755000  |
| 8 | 1.078921000  | -2.642090000 | 0.859363000  | 6 | -5.379552000  | 5.182255000  | 4.473096000  |
| 6 | -4.913646000 | -6.194277000 | 6.097494000  | 6 | -6.455600000  | 5.951856000  | 2.463355000  |
| 6 | -4.935973000 | -5.964346000 | 4.604019000  | 6 | -5.441868000  | 3.867248000  | 4.003446000  |
| 6 | -4.232535000 | -6.809716000 | 3.731294000  | 6 | -6.511608000  | 4.640681000  | 1.985936000  |

|               |              |              |              |   |              |              |              |
|---------------|--------------|--------------|--------------|---|--------------|--------------|--------------|
| 6             | -6.007834000 | 3.589656000  | 2.756606000  | 6 | 2.508417000  | -0.659775000 | 3.186622000  |
| 1             | -5.785654000 | 8.394444000  | 3.440936000  | 8 | 1.817667000  | -1.572485000 | 3.666519000  |
| 1             | -5.049148000 | 7.818198000  | 4.947837000  | 6 | 3.491367000  | 0.100366000  | 4.087169000  |
| 1             | -4.942003000 | 5.385697000  | 5.448377000  | 6 | 4.248036000  | 1.249533000  | 3.421788000  |
| 1             | -6.867742000 | 6.761443000  | 1.863683000  | 7 | 5.119974000  | 0.765780000  | 2.354956000  |
| 1             | -5.056864000 | 3.056667000  | 4.617743000  | 6 | 6.228233000  | 1.446031000  | 1.962918000  |
| 1             | -6.954753000 | 4.435131000  | 1.015386000  | 8 | 6.637813000  | 2.467246000  | 2.508303000  |
| 1             | -6.057160000 | 2.568698000  | 2.388357000  | 6 | 6.966940000  | 0.854699000  | 0.751825000  |
| 1             | -6.804945000 | 7.887849000  | 4.788941000  | 7 | 6.617792000  | 1.594977000  | -0.455957000 |
| 6             | 3.761130000  | 6.442691000  | -2.711806000 | 1 | 4.192905000  | -0.633076000 | 4.504471000  |
| 6             | 4.512692000  | 5.987891000  | -1.481524000 | 1 | 2.912504000  | 0.485687000  | 4.935140000  |
| 6             | 3.832623000  | 5.501216000  | -0.354248000 | 1 | 3.535591000  | 1.987384000  | 3.029620000  |
| 6             | 5.915665000  | 6.010017000  | -1.445395000 | 1 | 4.719695000  | 0.065433000  | 1.742050000  |
| 6             | 4.528307000  | 5.036373000  | 0.765681000  | 1 | 4.883424000  | 1.763534000  | 4.146935000  |
| 6             | 6.616723000  | 5.552606000  | -0.327123000 | 1 | 6.721202000  | -0.192658000 | 0.570955000  |
| 6             | 5.927211000  | 5.058903000  | 0.784999000  | 1 | 6.753559000  | 2.602504000  | -0.440930000 |
| 1             | 2.761487000  | 6.811470000  | -2.456439000 | 1 | 8.040625000  | 0.938896000  | 0.950187000  |
| 1             | 4.293487000  | 7.247156000  | -3.230229000 | 6 | 6.175653000  | 0.993926000  | -1.580478000 |
| 1             | 2.744226000  | 5.496528000  | -0.352203000 | 8 | 6.079397000  | -0.231038000 | -1.718658000 |
| 1             | 6.463289000  | 6.397772000  | -2.301470000 | 6 | 5.711805000  | 1.940087000  | -2.700107000 |
| 1             | 3.986710000  | 4.665271000  | 1.631905000  | 6 | 4.306822000  | 2.539568000  | -2.366026000 |
| 1             | 7.703015000  | 5.587941000  | -0.321343000 | 6 | 3.285033000  | 1.513073000  | -1.999471000 |
| 1             | 6.460444000  | 4.684171000  | 1.653278000  | 6 | 2.828745000  | 1.111935000  | -0.767202000 |
| 1             | 3.637669000  | 5.616520000  | -3.424808000 | 7 | 2.661909000  | 0.672998000  | -2.907912000 |
| 8             | -1.169309000 | 0.263677000  | 2.675410000  | 6 | 1.880471000  | -0.187444000 | -2.221050000 |
| 6             | -2.371154000 | 0.564131000  | 2.481588000  | 7 | 1.962617000  | 0.050535000  | -0.918329000 |
| 8             | -3.384372000 | -0.157202000 | 2.743416000  | 1 | 6.408841000  | 2.776699000  | -2.817722000 |
| 6             | -2.659424000 | 1.946066000  | 1.875357000  | 1 | 4.420678000  | 3.242456000  | -1.535253000 |
| 7             | -1.430955000 | 2.490941000  | 1.270853000  | 1 | 3.995073000  | 3.121817000  | -3.238345000 |
| 6             | -1.500212000 | 3.905340000  | 0.837182000  | 1 | 3.074380000  | 1.494870000  | 0.210793000  |
| 1             | -3.059699000 | 2.583517000  | 2.674794000  | 1 | 2.762007000  | 0.686864000  | -3.928288000 |
| 1             | -3.441024000 | 1.885525000  | 1.111905000  | 1 | 1.284298000  | -0.965111000 | -2.672118000 |
| 1             | -0.682653000 | 2.339487000  | 1.950212000  | 7 | 5.686575000  | 1.152311000  | -3.918280000 |
| 1             | -0.545458000 | 4.124900000  | 0.340936000  | 6 | 5.494949000  | 1.685613000  | -5.146909000 |
| 6             | -0.962442000 | 7.319619000  | 2.079690000  | 8 | 5.380381000  | 2.890324000  | -5.363295000 |
| 6             | -2.102039000 | 6.412318000  | 1.498696000  | 6 | 5.446044000  | 0.655630000  | -6.290417000 |
| 6             | -1.762228000 | 4.929532000  | 1.952861000  | 7 | 4.395456000  | 0.956306000  | -7.243380000 |
| 6             | -0.544985000 | 6.543635000  | 3.350176000  | 1 | 5.720664000  | 0.148978000  | -3.768559000 |
| 6             | -0.582526000 | 5.059198000  | 2.952199000  | 1 | 5.300682000  | -0.356890000 | -5.899959000 |
| 6             | 0.231827000  | 7.421648000  | 1.096260000  | 1 | 6.402580000  | 0.681288000  | -6.820632000 |
| 6             | -2.389616000 | 6.673333000  | 0.030116000  | 1 | 4.647489000  | 1.392043000  | -8.118762000 |
| 6             | -1.488567000 | 8.722676000  | 2.422527000  | 6 | 3.085385000  | 0.911313000  | -6.879725000 |
| 6             | -0.177786000 | 7.817847000  | -0.327715000 | 8 | 2.744288000  | 0.530611000  | -5.755406000 |
| 6             | -1.201487000 | 6.818107000  | -0.897412000 | 6 | 2.084931000  | 1.349149000  | -7.936082000 |
| 6             | -3.644223000 | 6.874620000  | -0.407229000 | 6 | 1.932172000  | 2.892978000  | -8.029850000 |
| 1             | -3.016552000 | 6.673106000  | 2.042383000  | 1 | 2.389860000  | 0.961722000  | -8.916439000 |
| 1             | 0.360438000  | 4.772509000  | 2.465307000  | 1 | 1.124668000  | 0.895743000  | -7.677079000 |
| 1             | -0.696335000 | 4.401254000  | 3.820734000  | 1 | 2.910533000  | 3.341129000  | -8.242498000 |
| 1             | -2.310287000 | 8.662651000  | 3.146038000  | 1 | 1.298582000  | 3.101617000  | -8.899846000 |
| 1             | -1.868335000 | 9.248707000  | 1.539831000  | 6 | 1.331247000  | 3.537311000  | -6.797657000 |
| 1             | -0.697899000 | 9.340412000  | 2.865356000  | 6 | 2.148802000  | 4.066586000  | -5.789451000 |
| 1             | 0.706008000  | 7.853832000  | -0.977458000 | 6 | -0.059937000 | 3.618328000  | -6.647962000 |
| 1             | -0.609885000 | 8.825873000  | -0.336119000 | 6 | 1.584347000  | 4.662763000  | -4.659377000 |
| 1             | -0.699423000 | 5.846845000  | -1.020730000 | 6 | -0.625772000 | 4.211518000  | -5.518423000 |
| 1             | -1.536009000 | 7.127128000  | -1.894245000 | 6 | 0.196969000  | 4.736935000  | -4.519473000 |
| 1             | -3.848603000 | 7.139726000  | -1.443419000 | 1 | 3.230348000  | 4.011213000  | -5.887444000 |
| 1             | -2.650030000 | 4.588897000  | 2.494548000  | 1 | -0.707219000 | 3.225330000  | -7.429618000 |
| 1             | -4.496848000 | 6.837777000  | 0.267758000  | 1 | 2.231723000  | 5.083067000  | -3.893654000 |
| 1             | 0.433146000  | 6.859473000  | 3.732461000  | 1 | -1.706799000 | 4.277846000  | -5.427113000 |
| 1             | 0.755918000  | 6.456159000  | 1.048021000  | 1 | -0.240626000 | 5.213362000  | -3.645887000 |
| 1             | 0.959172000  | 8.140689000  | 1.494856000  | 7 | 2.702685000  | -2.574970000 | 0.335364000  |
| 1             | -1.277776000 | 6.732201000  | 4.145890000  | 6 | 2.759085000  | -3.760887000 | 0.916981000  |
| 1             | -2.287051000 | 3.959404000  | 0.081440000  | 7 | 3.975544000  | -4.325114000 | 0.711928000  |
|               |              |              |              | 6 | 4.749196000  | -3.450689000 | -0.039088000 |
|               |              |              |              | 6 | 3.935867000  | -2.369021000 | -0.257623000 |
|               |              |              |              | 6 | 6.150644000  | -3.735453000 | -0.468662000 |
|               |              |              |              | 1 | 6.204961000  | -4.590691000 | -1.154303000 |
| <b>5TS1i:</b> |              |              |              |   |              |              |              |
| 26            | 1.114499000  | -1.094954000 | 0.695719000  |   |              |              |              |
| 8             | 2.484301000  | -0.292076000 | 1.948075000  |   |              |              |              |

|   |               |              |              |   |               |              |              |
|---|---------------|--------------|--------------|---|---------------|--------------|--------------|
| 1 | 6.549483000   | -2.858994000 | -0.986411000 | 8 | -4.675004000  | -2.502999000 | 0.275638000  |
| 1 | 4.172261000   | -1.471471000 | -0.807099000 | 1 | -10.825972000 | -3.018256000 | 0.545300000  |
| 1 | 4.266593000   | -5.230874000 | 1.052439000  | 1 | -10.409559000 | -4.704781000 | 0.223112000  |
| 1 | 1.959743000   | -4.212967000 | 1.482745000  | 1 | -8.933076000  | -2.216492000 | 1.848231000  |
| 1 | 6.804322000   | -3.952818000 | 0.385610000  | 1 | -8.205064000  | -4.360675000 | -1.808073000 |
| 8 | -0.013971000  | -2.841283000 | 1.091762000  | 1 | -6.514709000  | -1.703232000 | 2.034388000  |
| 6 | -0.461620000  | -2.942593000 | -0.098391000 | 1 | -5.782648000  | -3.849597000 | -1.622022000 |
| 8 | -0.082904000  | -2.110878000 | -0.977849000 | 1 | -4.426575000  | -1.970758000 | 1.110400000  |
| 6 | -1.458009000  | -4.025994000 | -0.434600000 | 1 | -10.581603000 | -3.576806000 | -1.120450000 |
| 1 | -2.472428000  | -3.643186000 | -0.266755000 | 6 | -4.679359000  | 2.626977000  | -4.626758000 |
| 1 | -1.366494000  | -4.313455000 | -1.485000000 | 6 | -3.649181000  | 1.524483000  | -4.355698000 |
| 1 | -1.311359000  | -4.895140000 | 0.211162000  | 6 | -4.168399000  | 0.471146000  | -3.367185000 |
| 7 | -0.971403000  | -1.497508000 | 4.352232000  | 6 | -3.179260000  | -0.656884000 | -3.056931000 |
| 6 | -1.680643000  | -2.527854000 | 4.805493000  | 7 | -1.963608000  | -0.161489000 | -2.380323000 |
| 7 | -3.015599000  | -2.536266000 | 4.654820000  | 1 | -4.963733000  | 3.130265000  | -3.695210000 |
| 7 | -1.084462000  | -3.533975000 | 5.478435000  | 1 | -5.592863000  | 2.214090000  | -5.071384000 |
| 6 | 0.339923000   | -3.571730000 | 5.815314000  | 1 | -2.731183000  | 1.984703000  | -3.963345000 |
| 6 | 0.596415000   | -4.575598000 | 6.935699000  | 1 | -3.369714000  | 1.035117000  | -5.300327000 |
| 1 | 0.043764000   | -4.307305000 | 7.842240000  | 1 | -4.454821000  | 0.968135000  | -2.430919000 |
| 1 | 1.663141000   | -4.597521000 | 7.178637000  | 1 | -5.083728000  | 0.019782000  | -3.775024000 |
| 1 | 0.642443000   | -2.566982000 | 6.125116000  | 1 | -2.937648000  | -1.200224000 | -3.986131000 |
| 1 | 0.937965000   | -3.817887000 | 4.929162000  | 1 | -3.651642000  | -1.377588000 | -2.379475000 |
| 1 | -1.631653000  | -4.371151000 | 5.641420000  | 1 | -1.394628000  | 0.380759000  | -3.029038000 |
| 1 | -1.479142000  | -0.734589000 | 3.883931000  | 1 | -1.382163000  | -0.941204000 | -2.060937000 |
| 1 | 0.023652000   | -1.592208000 | 4.134942000  | 1 | -2.108272000  | 0.728876000  | -0.785144000 |
| 1 | -3.561355000  | -3.290166000 | 5.051307000  | 1 | -4.287854000  | 3.383151000  | -5.317523000 |
| 1 | -3.437769000  | -1.977044000 | 3.897500000  | 6 | -3.758800000  | 4.551355000  | 5.854462000  |
| 1 | 0.302682000   | -5.590128000 | 6.639857000  | 6 | -4.794092000  | 4.017530000  | 4.890197000  |
| 8 | -0.157383000  | 0.009525000  | 1.099069000  | 6 | -4.751460000  | 2.685019000  | 4.454571000  |
| 6 | -4.612133000  | -4.739075000 | 8.649645000  | 6 | -5.841707000  | 4.832013000  | 4.434540000  |
| 6 | -4.339918000  | -5.269592000 | 7.261453000  | 6 | -5.734707000  | 2.177637000  | 3.601419000  |
| 6 | -3.246960000  | -6.113224000 | 7.010947000  | 6 | -6.822873000  | 4.329313000  | 3.576919000  |
| 6 | -5.194570000  | -4.961821000 | 6.191057000  | 6 | -6.775264000  | 2.997166000  | 3.158325000  |
| 6 | -3.017553000  | -6.638718000 | 5.734679000  | 1 | -3.610741000  | 5.629954000  | 5.731855000  |
| 6 | -4.969378000  | -5.482966000 | 4.912814000  | 1 | -2.790839000  | 4.056316000  | 5.719202000  |
| 6 | -3.877014000  | -6.322521000 | 4.678760000  | 1 | -3.938451000  | 2.036904000  | 4.771665000  |
| 1 | -5.094202000  | -3.756530000 | 8.617977000  | 1 | -5.891602000  | 5.868947000  | 4.760493000  |
| 1 | -3.690898000  | -4.647412000 | 9.234069000  | 1 | -5.683290000  | 1.138170000  | 3.286884000  |
| 1 | -2.577675000  | -6.373685000 | 7.827900000  | 1 | -7.627279000  | 4.976495000  | 3.236794000  |
| 1 | -6.051752000  | -4.314860000 | 6.363915000  | 1 | -7.537160000  | 2.607289000  | 2.489820000  |
| 1 | -2.174626000  | -7.305357000 | 5.569583000  | 1 | -4.063890000  | 4.384491000  | 6.896318000  |
| 1 | -5.648256000  | -5.233759000 | 4.101464000  | 6 | 6.842942000   | 6.027146000  | -4.048630000 |
| 1 | -3.702726000  | -6.731183000 | 3.687625000  | 6 | 6.993480000   | 5.680985000  | -2.585190000 |
| 1 | -5.281539000  | -5.412186000 | 9.200976000  | 6 | 5.959822000   | 5.937568000  | -1.670540000 |
| 6 | -11.170707000 | 2.597846000  | -0.276855000 | 6 | 8.158350000   | 5.062988000  | -2.105876000 |
| 6 | -9.668862000  | 2.732542000  | -0.373465000 | 6 | 6.075754000   | 5.571988000  | -0.327581000 |
| 6 | -9.041359000  | 3.980539000  | -0.271235000 | 6 | 8.282024000   | 4.699057000  | -0.761826000 |
| 6 | -8.852578000  | 1.611202000  | -0.593097000 | 6 | 7.237783000   | 4.945021000  | 0.136691000  |
| 6 | -7.657320000  | 4.115198000  | -0.387854000 | 1 | 6.175417000   | 6.883785000  | -4.190046000 |
| 6 | -7.470536000  | 1.725648000  | -0.712142000 | 1 | 7.809024000   | 6.273123000  | -4.502179000 |
| 6 | -6.865105000  | 2.983619000  | -0.608403000 | 1 | 5.056727000   | 6.435804000  | -2.016820000 |
| 8 | -5.501589000  | 3.047746000  | -0.736157000 | 1 | 8.980859000   | 4.873522000  | -2.792102000 |
| 1 | -11.618246000 | 3.457512000  | 0.232473000  | 1 | 5.264920000   | 5.787653000  | 0.363682000  |
| 1 | -11.459641000 | 1.694564000  | 0.272603000  | 1 | 9.199802000   | 4.232591000  | -0.412222000 |
| 1 | -9.644004000  | 4.869397000  | -0.099510000 | 1 | 7.323745000   | 4.645350000  | 1.177219000  |
| 1 | -9.306310000  | 0.625359000  | -0.667440000 | 1 | 6.420544000   | 5.181187000  | -4.607062000 |
| 1 | -7.195517000  | 5.095958000  | -0.306201000 | 8 | -2.496664000  | 0.449589000  | 2.981236000  |
| 1 | -6.850175000  | 0.849242000  | -0.872765000 | 6 | -3.260891000  | -0.080941000 | 2.159676000  |
| 1 | -5.178894000  | 3.934721000  | -0.480870000 | 8 | -3.966033000  | -1.132557000 | 2.355986000  |
| 1 | -11.632939000 | 2.531382000  | -1.271051000 | 6 | -3.441692000  | 0.593267000  | 0.772548000  |
| 6 | -10.217929000 | -3.669140000 | -0.090648000 | 7 | -2.208405000  | 1.129427000  | 0.184137000  |
| 6 | -8.752446000  | -3.331660000 | 0.010356000  | 6 | -2.086670000  | 2.604060000  | 0.113126000  |
| 6 | -8.247036000  | -2.579622000 | 1.086801000  | 1 | -4.182671000  | 1.392568000  | 0.895382000  |
| 6 | -7.838475000  | -3.781545000 | -0.963867000 | 1 | -3.854293000  | -0.146534000 | 0.081381000  |
| 6 | -6.893779000  | -2.288282000 | 1.202270000  | 1 | -1.074164000  | 0.525495000  | 0.739769000  |
| 6 | -6.484475000  | -3.502168000 | -0.870141000 | 1 | -1.216280000  | 2.807276000  | -0.520778000 |
| 6 | -5.992249000  | -2.751267000 | 0.219283000  | 6 | -0.910018000  | 5.543658000  | 1.907859000  |

|   |              |             |              |   |              |              |              |
|---|--------------|-------------|--------------|---|--------------|--------------|--------------|
| 6 | -2.257423000 | 4.842694000 | 1.521136000  | 6 | 5.051425000  | 0.979975000  | -6.117332000 |
| 6 | -1.947641000 | 3.287313000 | 1.479603000  | 7 | 3.958421000  | 1.190493000  | -7.047163000 |
| 6 | -0.234945000 | 4.469092000 | 2.790087000  | 1 | 5.379179000  | 0.449406000  | -3.602352000 |
| 6 | -0.538161000 | 3.124960000 | 2.109405000  | 1 | 5.017373000  | -0.049539000 | -5.745989000 |
| 6 | -0.052204000 | 5.826118000 | 0.648057000  | 1 | 5.989734000  | 1.113410000  | -6.663566000 |
| 6 | -2.938249000 | 5.482768000 | 0.326066000  | 1 | 4.153496000  | 1.644781000  | -7.927463000 |
| 6 | -1.155792000 | 6.844513000 | 2.688728000  | 6 | 2.665254000  | 0.983707000  | -6.680304000 |
| 6 | -0.810672000 | 6.580912000 | -0.451882000 | 8 | 2.376248000  | 0.557292000  | -5.557714000 |
| 6 | -2.073719000 | 5.805711000 | -0.875041000 | 6 | 1.614387000  | 1.272047000  | -7.742457000 |
| 6 | -4.232239000 | 5.845479000 | 0.373515000  | 6 | 1.449244000  | 2.776494000  | -8.086645000 |
| 1 | -2.934474000 | 4.975149000 | 2.372985000  | 1 | 1.875696000  | 0.724207000  | -8.657490000 |
| 1 | 0.204321000  | 2.911201000 | 1.330840000  | 1 | 0.669994000  | 0.869697000  | -7.368020000 |
| 1 | -0.510308000 | 2.277947000 | 2.797919000  | 1 | 2.410128000  | 3.185151000  | -8.424787000 |
| 1 | -1.740379000 | 6.647520000 | 3.595354000  | 1 | 0.771822000  | 2.838786000  | -8.946176000 |
| 1 | -1.706438000 | 7.586498000 | 2.100043000  | 6 | 0.906756000  | 3.619544000  | -6.950457000 |
| 1 | -0.206867000 | 7.300871000 | 2.996680000  | 6 | 1.770267000  | 4.242459000  | -6.038608000 |
| 1 | -0.160878000 | 6.730155000 | -1.323672000 | 6 | -0.475643000 | 3.789331000  | -6.793211000 |
| 1 | -1.096735000 | 7.580801000 | -0.103609000 | 6 | 1.259056000  | 5.019877000  | -4.996967000 |
| 1 | -1.755469000 | 4.877493000 | -1.371709000 | 6 | -0.987965000 | 4.564371000  | -5.751606000 |
| 1 | -2.651077000 | 6.375453000 | -1.612364000 | 6 | -0.119747000 | 5.184712000  | -4.850475000 |
| 1 | -4.701295000 | 6.380175000 | -0.451324000 | 1 | 2.845685000  | 4.121142000  | -6.136703000 |
| 1 | -2.677362000 | 2.813802000 | 2.141645000  | 1 | -1.157268000 | 3.322602000  | -7.501669000 |
| 1 | -4.838311000 | 5.680679000 | 1.262423000  | 1 | 1.944228000  | 5.510046000  | -4.309708000 |
| 1 | 0.839608000  | 4.651311000 | 2.918580000  | 1 | -2.062182000 | 4.696964000  | -5.654418000 |
| 1 | 0.311781000  | 4.877907000 | 0.228626000  | 1 | -0.515408000 | 5.804032000  | -4.049950000 |
| 1 | 0.840523000  | 6.391677000 | 0.946798000  | 7 | 2.757040000  | -2.677996000 | 0.324495000  |
| 1 | -0.685320000 | 4.493184000 | 3.791888000  | 6 | 2.898184000  | -3.925480000 | 0.740344000  |
| 1 | -2.977788000 | 2.973429000 | -0.410446000 | 7 | 4.140963000  | -4.374404000 | 0.440469000  |

**<sup>3</sup>TS1:**

|    |             |              |              |   |              |              |              |
|----|-------------|--------------|--------------|---|--------------|--------------|--------------|
| 26 | 1.150081000 | -1.463996000 | 0.807250000  | 6 | 4.840966000  | -3.358893000 | -0.197226000 |
| 8  | 2.486889000 | -0.501835000 | 2.010930000  | 6 | 3.958594000  | -2.312364000 | -0.255494000 |
| 6  | 2.499031000 | -0.882185000 | 3.242208000  | 6 | 6.248217000  | -3.490979000 | -0.677970000 |
| 8  | 1.843048000 | -1.839455000 | 3.690947000  | 1 | 6.344679000  | -4.251662000 | -1.463182000 |
| 6  | 3.415133000 | -0.088222000 | 4.183242000  | 1 | 6.574723000  | -2.532913000 | -1.091013000 |
| 6  | 4.034040000 | 1.178627000  | 3.591294000  | 1 | 4.125798000  | -1.333500000 | -0.675346000 |
| 7  | 4.933088000 | 0.865959000  | 2.484621000  | 1 | 4.494345000  | -5.297817000 | 0.648733000  |
| 6  | 5.963325000 | 1.678235000  | 2.135704000  | 1 | 2.137750000  | -4.499029000 | 1.245901000  |
| 8  | 6.281389000 | 2.691688000  | 2.752584000  | 1 | 6.934197000  | -3.762890000 | 0.134240000  |
| 6  | 6.734932000 | 1.249533000  | 0.876363000  | 8 | 0.133870000  | -3.191450000 | 0.992995000  |
| 7  | 6.228326000 | 1.953484000  | -0.297550000 | 6 | -0.447187000 | -3.301854000 | -0.148708000 |
| 1  | 4.201785000 | -0.769070000 | 4.533687000  | 8 | -0.219466000 | -2.478104000 | -1.067418000 |
| 1  | 2.820899000 | 0.172035000  | 5.066921000  | 6 | -1.437308000 | -4.430779000 | -0.335879000 |
| 1  | 3.240425000 | 1.861667000  | 3.259057000  | 1 | -2.450003000 | -4.039186000 | -0.178897000 |
| 1  | 4.593883000 | 0.169927000  | 1.830903000  | 1 | -1.378929000 | -4.816001000 | -1.357559000 |
| 1  | 4.623411000 | 1.707527000  | 4.344118000  | 1 | -1.260583000 | -5.234046000 | 0.382855000  |
| 1  | 6.650619000 | 0.181191000  | 0.671575000  | 7 | -0.933664000 | -1.628988000 | 4.383610000  |
| 1  | 6.247448000 | 2.969663000  | -0.275257000 | 6 | -1.670693000 | -2.621348000 | 4.874287000  |
| 1  | 7.787983000 | 1.500416000  | 1.038388000  | 7 | -3.008193000 | -2.588929000 | 4.734899000  |
| 6  | 5.810897000 | 1.316763000  | -1.411303000 | 7 | -1.103353000 | -3.625399000 | 5.573456000  |
| 8  | 5.844901000 | 0.089793000  | -1.562441000 | 6 | 0.323475000  | -3.708167000 | 5.894113000  |
| 6  | 5.210487000 | 2.215515000  | -2.504665000 | 6 | 0.552274000  | -4.660963000 | 7.064053000  |
| 6  | 3.751842000 | 2.643287000  | -2.137389000 | 1 | 0.026632000  | -4.319464000 | 7.962023000  |
| 6  | 2.856876000 | 1.498157000  | -1.787131000 | 1 | 1.620792000  | -4.718550000 | 7.292945000  |
| 6  | 2.460741000 | 1.017065000  | -0.561816000 | 1 | 0.673159000  | -2.702703000 | 6.144730000  |
| 7  | 2.324883000 | 0.614675000  | -2.711436000 | 1 | 0.896350000  | -4.026773000 | 5.014780000  |
| 6  | 1.652147000 | -0.346193000 | -2.041008000 | 1 | -1.675666000 | -4.441105000 | 5.757873000  |
| 7  | 1.715124000 | -0.130693000 | -0.733113000 | 1 | -1.418462000 | -0.866729000 | 3.897193000  |
| 1  | 5.802023000 | 3.129255000  | -2.625451000 | 1 | 0.054390000  | -1.763799000 | 4.149757000  |
| 1  | 3.796760000 | 3.333066000  | -1.289281000 | 1 | -3.571850000 | -3.321435000 | 5.146333000  |
| 1  | 3.363279000 | 3.209086000  | -2.990506000 | 1 | -3.406553000 | -2.061056000 | 3.945368000  |
| 1  | 2.678814000 | 1.392934000  | 0.424851000  | 1 | 0.209114000  | -5.675710000 | 6.828003000  |
| 1  | 2.418894000 | 0.661698000  | -3.731410000 | 8 | -0.195856000 | -0.542422000 | 1.436856000  |
| 1  | 1.150588000 | -1.181678000 | -2.502974000 | 6 | -4.660320000 | -4.673666000 | 8.782739000  |
| 7  | 5.249751000 | 1.447180000  | -3.734317000 | 6 | -4.411428000 | -5.231031000 | 7.400718000  |
| 6  | 5.022032000 | 1.987288000  | -4.953777000 | 6 | -3.341545000 | -6.105759000 | 7.156232000  |
| 8  | 4.819208000 | 3.184437000  | -5.144408000 | 6 | -5.264186000 | -4.917177000 | 6.330831000  |
|    |             |              |              | 6 | -3.133029000 | -6.655215000 | 5.886713000  |
|    |             |              |              | 6 | -5.059620000 | -5.462115000 | 5.058861000  |

|   |               |              |              |              |              |              |              |
|---|---------------|--------------|--------------|--------------|--------------|--------------|--------------|
| 6 | -3.990383000  | -6.332348000 | 4.830909000  | 1            | -3.755939000 | 2.157510000  | 4.679206000  |
| 1 | -5.149871000  | -3.695351000 | 8.740269000  | 1            | -5.436851000 | 6.106579000  | 4.389378000  |
| 1 | -3.728303000  | -4.563442000 | 9.346668000  | 1            | -5.479308000 | 1.306812000  | 3.143085000  |
| 1 | -2.673833000  | -6.370939000 | 7.972972000  | 1            | -7.150021000 | 5.258127000  | 2.815661000  |
| 1 | -6.103319000  | -4.245816000 | 6.498999000  | 1            | -7.185349000 | 2.854541000  | 2.183114000  |
| 1 | -2.308011000  | -7.344978000 | 5.726461000  | 1            | -3.850650000 | 4.665400000  | 6.681282000  |
| 1 | -5.736341000  | -5.206819000 | 4.247509000  | 6            | 5.732036000  | 6.473818000  | -3.653223000 |
| 1 | -3.831862000  | -6.759251000 | 3.844843000  | 6            | 6.022251000  | 6.089341000  | -2.220576000 |
| 1 | -5.313332000  | -5.339972000 | 9.361337000  | 6            | 5.019209000  | 6.136030000  | -1.239717000 |
| 6 | -10.745419000 | 3.507635000  | -1.190563000 | 6            | 7.296444000  | 5.642597000  | -1.838466000 |
| 6 | -9.245970000  | 3.385580000  | -1.052133000 | 6            | 5.272463000  | 5.732344000  | 0.073423000  |
| 6 | -8.438375000  | 4.511598000  | -0.849328000 | 6            | 7.556897000  | 5.241469000  | -0.525095000 |
| 6 | -8.608610000  | 2.137639000  | -1.143693000 | 6            | 6.544200000  | 5.277769000  | 0.440271000  |
| 6 | -7.050507000  | 4.408402000  | -0.748425000 | 1            | 4.908808000  | 7.193670000  | -3.714982000 |
| 6 | -7.225985000  | 2.014030000  | -1.044481000 | 1            | 6.608892000  | 6.923051000  | -4.131702000 |
| 6 | -6.437514000  | 3.154593000  | -0.847373000 | 1            | 4.029705000  | 6.499559000  | -1.509266000 |
| 8 | -5.080212000  | 2.983914000  | -0.767089000 | 1            | 8.094724000  | 5.616789000  | -2.576972000 |
| 1 | -11.110518000 | 4.451538000  | -0.773018000 | 1            | 4.481080000  | 5.782308000  | 0.817201000  |
| 1 | -11.265103000 | 2.690334000  | -0.677468000 | 1            | 8.555230000  | 4.909172000  | -0.251403000 |
| 1 | -8.900006000  | 5.493069000  | -0.770013000 | 1            | 6.737037000  | 4.946524000  | 1.456653000  |
| 1 | -9.208331000  | 1.242421000  | -1.293016000 | 1            | 5.449723000  | 5.592184000  | -4.243965000 |
| 1 | -6.447417000  | 5.299015000  | -0.592226000 | 8            | -2.492327000 | 0.359770000  | 3.011461000  |
| 1 | -6.744831000  | 1.042932000  | -1.108754000 | 6            | -3.154398000 | -0.227859000 | 2.144217000  |
| 1 | -4.646318000  | 3.822634000  | -0.512642000 | 8            | -3.845610000 | -1.291855000 | 2.314776000  |
| 1 | -11.055474000 | 3.475209000  | -2.243796000 | 6            | -3.210221000 | 0.387037000  | 0.710036000  |
| 6 | -10.198843000 | -3.678650000 | 0.172659000  | 7            | -1.906511000 | 0.775629000  | 0.158428000  |
| 6 | -8.722726000  | -3.379827000 | 0.203298000  | 6            | -1.626115000 | 2.228746000  | 0.073003000  |
| 6 | -8.145692000  | -2.662072000 | 1.268956000  | 1            | -3.876562000 | 1.257269000  | 0.758726000  |
| 6 | -7.870132000  | -3.832762000 | -0.824415000 | 1            | -3.651773000 | -0.351257000 | 0.036335000  |
| 6 | -6.782860000  | -2.408615000 | 1.324182000  | 1            | -0.915783000 | 0.063160000  | 0.844584000  |
| 6 | -6.507245000  | -3.588373000 | -0.793587000 | 1            | -0.712446000 | 2.329448000  | -0.522316000 |
| 6 | -5.941788000  | -2.873154000 | 0.286325000  | 6            | -0.302270000 | 5.111248000  | 1.868876000  |
| 8 | -4.620818000  | -2.662607000 | 0.282659000  | 6            | -1.682616000 | 4.504872000  | 1.439340000  |
| 1 | -10.767756000 | -2.961783000 | 0.773189000  | 6            | -1.488751000 | 2.930307000  | 1.432551000  |
| 1 | -10.408523000 | -4.679517000 | 0.576100000  | 6            | 0.253037000  | 4.006558000  | 2.795681000  |
| 1 | -8.785346000  | -2.295430000 | 2.068113000  | 6            | -0.120379000 | 2.678052000  | 2.120576000  |
| 1 | -8.293616000  | -4.384841000 | -1.659873000 | 6            | 0.622642000  | 5.303209000  | 0.639456000  |
| 1 | -6.347410000  | -1.848618000 | 2.145727000  | 6            | -2.266176000 | 5.179061000  | 0.213660000  |
| 1 | -5.851777000  | -3.936217000 | -1.585876000 | 6            | -0.479965000 | 6.442453000  | 2.615629000  |
| 1 | -4.318779000  | -2.127627000 | 1.103821000  | 6            | -0.034178000 | 6.087212000  | -0.504686000 |
| 1 | -10.592189000 | -3.658463000 | -0.849601000 | 6            | -1.337145000 | 5.401189000  | -0.961130000 |
| 6 | -4.484083000  | 2.432334000  | -4.737233000 | 6            | -3.520200000 | 5.664898000  | 0.216699000  |
| 6 | -3.536475000  | 1.266802000  | -4.432080000 | 1            | -2.378352000 | 4.700778000  | 2.263120000  |
| 6 | -4.094444000  | 0.329664000  | -3.351635000 | 1            | 0.633859000  | 2.404667000  | 1.373689000  |
| 6 | -3.206251000  | -0.876171000 | -3.031725000 | 1            | -0.179064000 | 1.839280000  | 2.817075000  |
| 7 | -1.916873000  | -0.484792000 | -2.428091000 | 1            | -1.109084000 | 6.306597000  | 3.503361000  |
| 1 | -4.674384000  | 3.025597000  | -3.835196000 | 1            | -0.954303000 | 7.209298000  | 1.993201000  |
| 1 | -5.451990000  | 2.070237000  | -5.104208000 | 1            | 0.488120000  | 6.835570000  | 2.949985000  |
| 1 | -2.566106000  | 1.673662000  | -4.113668000 | 1            | 0.656761000  | 6.163216000  | -1.354148000 |
| 1 | -3.345453000  | 0.692982000  | -5.350849000 | 1            | -0.254710000 | 7.114118000  | -0.188781000 |
| 1 | -4.272524000  | 0.904337000  | -2.433624000 | 1            | -1.074322000 | 4.441239000  | -1.427482000 |
| 1 | -5.072870000  | -0.047817000 | -3.680923000 | 1            | -1.840871000 | 5.997725000  | -1.730754000 |
| 1 | -3.059915000  | -1.474868000 | -3.946945000 | 1            | -3.912153000 | 6.224065000  | -0.631632000 |
| 1 | -3.713897000  | -1.523641000 | -2.307810000 | 1            | -2.273222000 | 2.524255000  | 2.075448000  |
| 1 | -1.340969000  | 0.002314000  | -3.113433000 | 1            | -4.162938000 | 5.579342000  | 1.091124000  |
| 1 | -1.394825000  | -1.315568000 | -2.133619000 | 1            | 1.332060000  | 4.111502000  | 2.968508000  |
| 1 | -1.826993000  | 0.349315000  | -0.803532000 | 1            | 0.932718000  | 4.322588000  | 0.252489000  |
| 1 | -4.067044000  | 3.098293000  | -5.501410000 | 1            | 1.541744000  | 5.809968000  | 0.964444000  |
| 6 | -3.459322000  | 4.706444000  | 5.655858000  | 1            | -0.235903000 | 4.081856000  | 3.776558000  |
| 6 | -4.477346000  | 4.194523000  | 4.661646000  | 1            | -2.451016000 | 2.671612000  | -0.501978000 |
| 6 | -4.503738000  | 2.842965000  | 4.289087000  |              |              |              |              |
| 6 | -5.441705000  | 5.054047000  | 4.113301000  |              |              |              |              |
| 6 | -5.474694000  | 2.361297000  | 3.407326000  |              |              |              |              |
| 6 | -6.409974000  | 4.576679000  | 3.227415000  |              |              |              |              |
| 6 | -6.432591000  | 3.225082000  | 2.872744000  |              |              |              |              |
| 1 | -3.189867000  | 5.749819000  | 5.457085000  |              |              |              |              |
| 1 | -2.542381000  | 4.107439000  | 5.636127000  |              |              |              |              |
|   |               |              |              | <b>5IM1:</b> |              |              |              |
|   |               |              |              | 26           | 0.988739000  | -0.626382000 | 0.361715000  |
|   |               |              |              | 8            | 2.158134000  | -0.066554000 | 1.890454000  |
|   |               |              |              | 6            | 2.384358000  | -0.583862000 | 3.051576000  |
|   |               |              |              | 8            | 1.771939000  | -1.543357000 | 3.548453000  |
|   |               |              |              | 6            | 3.497080000  | 0.084286000  | 3.870798000  |



|   |              |              |              |   |               |              |              |
|---|--------------|--------------|--------------|---|---------------|--------------|--------------|
| 6 | 4.368734000  | 1.085580000  | 3.117118000  | 1 | 1.563844000   | -3.714720000 | 1.597121000  |
| 7 | 5.168048000  | 0.433264000  | 2.082257000  | 1 | 6.359882000   | -4.303396000 | 0.437431000  |
| 6 | 6.382635000  | 0.911599000  | 1.703723000  | 8 | -0.318299000  | -2.207326000 | 0.881586000  |
| 8 | 6.927230000  | 1.883737000  | 2.219802000  | 6 | -0.670929000  | -2.416842000 | -0.328245000 |
| 6 | 7.061438000  | 0.163413000  | 0.546833000  | 8 | -0.147824000  | -1.716586000 | -1.251351000 |
| 7 | 6.928557000  | 0.940896000  | -0.680175000 | 6 | -1.709711000  | -3.465046000 | -0.635869000 |
| 1 | 4.107413000  | -0.707835000 | 4.319286000  | 1 | -2.707039000  | -3.085611000 | -0.378633000 |
| 1 | 3.003553000  | 0.599071000  | 4.705912000  | 1 | -1.689797000  | -3.724793000 | -1.696449000 |
| 1 | 3.739311000  | 1.868175000  | 2.675801000  | 1 | -1.532656000  | -4.356552000 | -0.027109000 |
| 1 | 4.706581000  | -0.259915000 | 1.505726000  | 7 | -0.991022000  | -1.421065000 | 4.150209000  |
| 1 | 5.072933000  | 1.572213000  | 3.795723000  | 6 | -1.750497000  | -2.330411000 | 4.752942000  |
| 1 | 6.629189000  | -0.819781000 | 0.356086000  | 7 | -3.089027000  | -2.206714000 | 4.708398000  |
| 1 | 7.221451000  | 1.914100000  | -0.650602000 | 7 | -1.207181000  | -3.336469000 | 5.467825000  |
| 1 | 8.117893000  | 0.041782000  | 0.809211000  | 6 | 0.227693000   | -3.546180000 | 5.668634000  |
| 6 | 6.446540000  | 0.418101000  | -1.827551000 | 6 | 0.480312000   | -4.305805000 | 6.968808000  |
| 8 | 6.166107000  | -0.776035000 | -1.978835000 | 1 | 0.109455000   | -3.743578000 | 7.831886000  |
| 6 | 6.177129000  | 1.428292000  | -2.954226000 | 1 | 1.553953000   | -4.471556000 | 7.101245000  |
| 6 | 4.900751000  | 2.272414000  | -2.632644000 | 1 | 0.719807000   | -2.571133000 | 5.692378000  |
| 6 | 3.707187000  | 1.448833000  | -2.271338000 | 1 | 0.655706000   | -4.091027000 | 4.816091000  |
| 6 | 3.157565000  | 1.160658000  | -1.045632000 | 1 | -1.831777000  | -4.085362000 | 5.746747000  |
| 7 | 2.965109000  | 0.714235000  | -3.182448000 | 1 | -1.454986000  | -0.671539000 | 3.623153000  |
| 6 | 2.026992000  | 0.021342000  | -2.505688000 | 1 | -0.007658000  | -1.595217000 | 3.916758000  |
| 7 | 2.117344000  | 0.269195000  | -1.203817000 | 1 | -3.676581000  | -2.900931000 | 5.152214000  |
| 1 | 7.015194000  | 2.125347000  | -3.062364000 | 1 | -3.504298000  | -1.645244000 | 3.953733000  |
| 1 | 5.132665000  | 2.945973000  | -1.802446000 | 1 | -0.008240000  | -5.287790000 | 6.961182000  |
| 1 | 4.704457000  | 2.898296000  | -3.508015000 | 8 | -0.268984000  | 0.694251000  | 0.496274000  |
| 1 | 3.441406000  | 1.521820000  | -0.068940000 | 6 | -4.975980000  | -4.282153000 | 8.508451000  |
| 1 | 3.083460000  | 0.698097000  | -4.201477000 | 6 | -4.689332000  | -4.811646000 | 7.122611000  |
| 1 | 1.315128000  | -0.650322000 | -2.960134000 | 6 | -3.623419000  | -5.696630000 | 6.893355000  |
| 7 | 6.022941000  | 0.655139000  | -4.171707000 | 6 | -5.504460000  | -4.464947000 | 6.033311000  |
| 6 | 5.942503000  | 1.211095000  | -5.402689000 | 6 | -3.386520000  | -6.225777000 | 5.619956000  |
| 8 | 6.046432000  | 2.416487000  | -5.620205000 | 6 | -5.270600000  | -4.988601000 | 4.756887000  |
| 6 | 5.718347000  | 0.206110000  | -6.547572000 | 6 | -4.208392000  | -5.871111000 | 4.546064000  |
| 7 | 4.739482000  | 0.689290000  | -7.502113000 | 1 | -5.460334000  | -3.300961000 | 8.472902000  |
| 1 | 5.888773000  | -0.339859000 | -4.021771000 | 1 | -4.061015000  | -4.189160000 | 9.102811000  |
| 1 | 5.396253000  | -0.765882000 | -6.160203000 | 1 | -2.987690000  | -5.990486000 | 7.726034000  |
| 1 | 6.666047000  | 0.064717000  | -7.075336000 | 1 | -6.339614000  | -3.785699000 | 6.189825000  |
| 1 | 5.067081000  | 1.079525000  | -8.373876000 | 1 | -2.567699000  | -6.925514000 | 5.470804000  |
| 6 | 3.440754000  | 0.872386000  | -7.141793000 | 1 | -5.915333000  | -4.704364000 | 3.929101000  |
| 8 | 3.034373000  | 0.551019000  | -6.020503000 | 1 | -4.027323000  | -6.281721000 | 3.557033000  |
| 6 | 2.535331000  | 1.485899000  | -8.196315000 | 1 | -5.648883000  | -4.957585000 | 9.052591000  |
| 6 | 2.647896000  | 3.034286000  | -8.271411000 | 6 | -10.487995000 | 0.102721000  | 0.533386000  |
| 1 | 2.774498000  | 1.063837000  | -9.180537000 | 6 | -9.348715000  | 0.997027000  | 0.101677000  |
| 1 | 1.510597000  | 1.200237000  | -7.945262000 | 6 | -9.292608000  | 2.343348000  | 0.479669000  |
| 1 | 3.688607000  | 3.311862000  | -8.479140000 | 6 | -8.317062000  | 0.506602000  | -0.713736000 |
| 1 | 2.060270000  | 3.357934000  | -9.138526000 | 6 | -8.248144000  | 3.176745000  | 0.069946000  |
| 6 | 2.163797000  | 3.755527000  | -7.030385000 | 6 | -7.271894000  | 1.324268000  | -1.136374000 |
| 6 | 3.060417000  | 4.139200000  | -6.023818000 | 6 | -7.230601000  | 2.664293000  | -0.738062000 |
| 6 | 0.803545000  | 4.052754000  | -6.868909000 | 8 | -6.166593000  | 3.426689000  | -1.165542000 |
| 6 | 2.604087000  | 4.804604000  | -4.883442000 | 1 | -11.014163000 | 0.515639000  | 1.400490000  |
| 6 | 0.345355000  | 4.714179000  | -5.728559000 | 1 | -10.128345000 | -0.897841000 | 0.798291000  |
| 6 | 1.246395000  | 5.092697000  | -4.730717000 | 1 | -10.080825000 | 2.756901000  | 1.104854000  |
| 1 | 4.119209000  | 3.916477000  | -6.131467000 | 1 | -8.326094000  | -0.537351000 | -1.017684000 |
| 1 | 0.097669000  | 3.775653000  | -7.649600000 | 1 | -8.230009000  | 4.220410000  | 0.376053000  |
| 1 | 3.314464000  | 5.111268000  | -4.119752000 | 1 | -6.482888000  | 0.935187000  | -1.773138000 |
| 1 | -0.711530000 | 4.947587000  | -5.628092000 | 1 | -6.179628000  | 4.292071000  | -0.716069000 |
| 1 | 0.895095000  | 5.620814000  | -3.848154000 | 1 | -11.227660000 | -0.020329000 | -0.268977000 |
| 7 | 2.486472000  | -2.362308000 | 0.232024000  | 6 | -10.082277000 | -4.705998000 | 0.747626000  |
| 6 | 2.397688000  | -3.458572000 | 0.963172000  | 6 | -8.734113000  | -4.028129000 | 0.653902000  |
| 7 | 3.522011000  | -4.209161000 | 0.830745000  | 6 | -8.215805000  | -3.279883000 | 1.718117000  |
| 6 | 4.389622000  | -3.556202000 | -0.032874000 | 6 | -7.944430000  | -4.142950000 | -0.501073000 |
| 6 | 3.722695000  | -2.410816000 | -0.389004000 | 6 | -6.958599000  | -2.673871000 | 1.645979000  |
| 6 | 5.725639000  | -4.090740000 | -0.432677000 | 6 | -6.688042000  | -3.548701000 | -0.591268000 |
| 1 | 5.639595000  | -5.017826000 | -1.013871000 | 6 | -6.184233000  | -2.810322000 | 0.487042000  |
| 1 | 6.236240000  | -3.348265000 | -1.051613000 | 8 | -4.946384000  | -2.246098000 | 0.363739000  |
| 1 | 4.062765000  | -1.638434000 | -1.060848000 | 1 | -10.676352000 | -4.301851000 | 1.573911000  |
| 1 | 3.697077000  | -5.091801000 | 1.290190000  | 1 | -9.980395000  | -5.786433000 | 0.916391000  |

|   |               |              |              |              |              |              |              |
|---|---------------|--------------|--------------|--------------|--------------|--------------|--------------|
| 1 | -8.806373000  | -3.161530000 | 2.624371000  | 6            | -1.324944000 | 3.754529000  | 1.920741000  |
| 1 | -8.320040000  | -4.712807000 | -1.348368000 | 6            | -1.305047000 | 6.621355000  | 0.701209000  |
| 1 | -6.584350000  | -2.079632000 | 2.475711000  | 6            | -4.139743000 | 5.901493000  | 0.552024000  |
| 1 | -6.085133000  | -3.647395000 | -1.489243000 | 6            | -2.336038000 | 7.293068000  | 2.914570000  |
| 1 | -4.709093000  | -1.773506000 | 1.198350000  | 6            | -2.248367000 | 7.348552000  | -0.265141000 |
| 1 | -10.662139000 | -4.579444000 | -0.173942000 | 6            | -3.419501000 | 6.434207000  | -0.669328000 |
| 6 | -4.075557000  | 3.796282000  | -4.528945000 | 6            | -5.465340000 | 6.060744000  | 0.706960000  |
| 6 | -3.011515000  | 2.754494000  | -4.164122000 | 1            | -3.910795000 | 5.277016000  | 2.554295000  |
| 6 | -3.628231000  | 1.419855000  | -3.723418000 | 1            | -0.668762000 | 3.711949000  | 1.043410000  |
| 6 | -2.615382000  | 0.325854000  | -3.372452000 | 1            | -1.100851000 | 2.866394000  | 2.515039000  |
| 7 | -1.773048000  | 0.682427000  | -2.210984000 | 1            | -2.806918000 | 6.939720000  | 3.839494000  |
| 1 | -4.754041000  | 3.975343000  | -3.686259000 | 1            | -3.024604000 | 8.006593000  | 2.448784000  |
| 1 | -4.684736000  | 3.456997000  | -5.375362000 | 1            | -1.425590000 | 7.838934000  | 3.190043000  |
| 1 | -2.378200000  | 3.155388000  | -3.359047000 | 1            | -1.700429000 | 7.663801000  | -1.161477000 |
| 1 | -2.343353000  | 2.585900000  | -5.021122000 | 1            | -2.642759000 | 8.261767000  | 0.196939000  |
| 1 | -4.283792000  | 1.595606000  | -2.859255000 | 1            | -3.015057000 | 5.601931000  | -1.264230000 |
| 1 | -4.272618000  | 1.040854000  | -4.528712000 | 1            | -4.123649000 | 6.967196000  | -1.318242000 |
| 1 | -2.001485000  | 0.091737000  | -4.256821000 | 1            | -6.065387000 | 6.582289000  | -0.037991000 |
| 1 | -3.152407000  | -0.592263000 | -3.108935000 | 1            | -3.402255000 | 3.188949000  | 2.190988000  |
| 1 | -1.076164000  | 1.379318000  | -2.471599000 | 1            | -5.978536000 | 5.729710000  | 1.607228000  |
| 1 | -1.240465000  | -0.131004000 | -1.891005000 | 1            | -0.065552000 | 5.370275000  | 2.739778000  |
| 1 | -2.442659000  | 1.274926000  | -0.764651000 | 1            | -0.848460000 | 5.775517000  | 0.168122000  |
| 1 | -3.621181000  | 4.753547000  | -4.810163000 | 1            | -0.476356000 | 7.281177000  | 0.989522000  |
| 6 | -3.535333000  | 4.039481000  | 6.390784000  | 1            | -1.459966000 | 4.941109000  | 3.733464000  |
| 6 | -4.660871000  | 3.672918000  | 5.450091000  | 1            | -4.056558000 | 3.451973000  | -0.269417000 |
| 6 | -4.712264000  | 2.407148000  | 4.847350000  |              |              |              |              |
| 6 | -5.700665000  | 4.575621000  | 5.184236000  | <b>5TS2:</b> |              |              |              |
| 6 | -5.774783000  | 2.049491000  | 4.013130000  | 26           | 0.728432000  | -1.562447000 | -0.151733000 |
| 6 | -6.763358000  | 4.224181000  | 4.347850000  | 8            | 2.395612000  | -1.508461000 | 1.075054000  |
| 6 | -6.805360000  | 2.958320000  | 3.758062000  | 6            | 2.534768000  | -1.181765000 | 2.344778000  |
| 1 | -3.351724000  | 5.119343000  | 6.399114000  | 8            | 1.577410000  | -0.798105000 | 3.085247000  |
| 1 | -2.601356000  | 3.537213000  | 6.115804000  | 6            | 3.947061000  | -1.286362000 | 2.902890000  |
| 1 | -3.912631000  | 1.693016000  | 5.031475000  | 6            | 4.975660000  | -0.437683000 | 2.134445000  |
| 1 | -5.681846000  | 5.561278000  | 5.644413000  | 7            | 5.166385000  | -0.929514000 | 0.763390000  |
| 1 | -5.792912000  | 1.058658000  | 3.566947000  | 6            | 6.208083000  | -0.496529000 | 0.007079000  |
| 1 | -7.562667000  | 4.938241000  | 4.164848000  | 8            | 7.047989000  | 0.340505000  | 0.421822000  |
| 1 | -7.628995000  | 2.681727000  | 3.106065000  | 6            | 6.306798000  | -1.048472000 | -1.414687000 |
| 1 | -3.769494000  | 3.744318000  | 7.422379000  | 7            | 6.046706000  | 0.040342000  | -2.366107000 |
| 6 | 8.093710000   | 5.216735000  | -4.322354000 | 1            | 4.255702000  | -2.339788000 | 2.878378000  |
| 6 | 8.087388000   | 4.893681000  | -2.846104000 | 1            | 3.926127000  | -0.962347000 | 3.945975000  |
| 6 | 7.070080000   | 5.372877000  | -2.005320000 | 1            | 4.662655000  | 0.615424000  | 2.118351000  |
| 6 | 9.079609000   | 4.079576000  | -2.279811000 | 1            | 4.411783000  | -1.489820000 | 0.378858000  |
| 6 | 7.032334000   | 5.035258000  | -0.650873000 | 1            | 5.942269000  | -0.466457000 | 2.646178000  |
| 6 | 9.049702000   | 3.741753000  | -0.923292000 | 1            | 5.589267000  | -1.845034000 | -1.614863000 |
| 6 | 8.020740000   | 4.211670000  | -0.099642000 | 1            | 6.511219000  | 0.927919000  | -2.189751000 |
| 1 | 7.645635000   | 6.196582000  | -4.519078000 | 1            | 7.317702000  | -1.447996000 | -1.553409000 |
| 1 | 9.111929000   | 5.223994000  | -4.725481000 | 6            | 5.247824000  | -0.114512000 | -3.444589000 |
| 1 | 6.302578000   | 6.023635000  | -2.419145000 | 8            | 4.763650000  | -1.227338000 | -3.795930000 |
| 1 | 9.890469000   | 3.714571000  | -2.906438000 | 6            | 4.848527000  | 1.162674000  | -4.189219000 |
| 1 | 6.238775000   | 5.425405000  | -0.018457000 | 6            | 3.833538000  | 2.000086000  | -3.326152000 |
| 1 | 9.838163000   | 3.120583000  | -0.505310000 | 6            | 2.693928000  | 1.188789000  | -2.798678000 |
| 1 | 7.986368000   | 3.934565000  | 0.949861000  | 6            | 2.554371000  | 0.537874000  | -1.590767000 |
| 1 | 7.518782000   | 4.469968000  | -4.885746000 | 7            | 1.564835000  | 0.836034000  | -3.542469000 |
| 8 | -2.244817000  | 0.567052000  | 2.501596000  | 6            | 0.793463000  | 0.000866000  | -2.798497000 |
| 6 | -3.331677000  | 0.178112000  | 2.031170000  | 7            | 1.375580000  | -0.206117000 | -1.607025000 |
| 8 | -4.088092000  | -0.729904000 | 2.466986000  | 1            | 5.720131000  | 1.796986000  | -4.384913000 |
| 6 | -3.924594000  | 0.903949000  | 0.744121000  | 1            | 4.383130000  | 2.443116000  | -2.490201000 |
| 7 | -3.011301000  | 1.726593000  | 0.030586000  | 1            | 3.488608000  | 2.825525000  | -3.956324000 |
| 6 | -3.050762000  | 3.167682000  | 0.080417000  | 1            | 3.214499000  | 0.528615000  | -0.741245000 |
| 1 | -4.785237000  | 1.483353000  | 1.092175000  | 1            | 1.350000000  | 1.146352000  | -4.499554000 |
| 1 | -4.273360000  | 0.101918000  | 0.084388000  | 1            | -0.141616000 | -0.433609000 | -3.107404000 |
| 1 | -0.853667000  | 0.710726000  | 1.283953000  | 7            | 4.245120000  | 0.741374000  | -5.447643000 |
| 1 | -2.315418000  | 3.531124000  | -0.642250000 | 6            | 3.932642000  | 1.609688000  | -6.439022000 |
| 6 | -2.005391000  | 6.112476000  | 1.987671000  | 8            | 4.207665000  | 2.833564000  | -6.393943000 |
| 6 | -3.292650000  | 5.282149000  | 1.649608000  | 6            | 3.199601000  | 0.999027000  | -7.639942000 |
| 6 | -2.811381000  | 3.777868000  | 1.483235000  | 7            | 2.104532000  | 1.852404000  | -8.086977000 |
| 6 | -1.117810000  | 5.063797000  | 2.696971000  | 1            | 4.001065000  | -0.243461000 | -5.487291000 |

|   |              |              |              |   |              |              |              |
|---|--------------|--------------|--------------|---|--------------|--------------|--------------|
| 1 | 2.814831000  | 0.004990000  | -7.388442000 | 1 | -2.464777000 | -4.662777000 | 9.491326000  |
| 1 | 3.905404000  | 0.893180000  | -8.468684000 | 1 | -5.643289000 | -3.065256000 | 7.067047000  |
| 1 | 2.187318000  | 2.318466000  | -8.977505000 | 1 | -1.726986000 | -6.072262000 | 7.590016000  |
| 6 | 1.039776000  | 2.124267000  | -7.281655000 | 1 | -4.894707000 | -4.444693000 | 5.160772000  |
| 8 | 0.960476000  | 1.617627000  | -6.130461000 | 1 | -2.928749000 | -5.960682000 | 5.406551000  |
| 6 | -0.045765000 | 3.016691000  | -7.853859000 | 1 | -5.368854000 | -3.472912000 | 10.152745000 |
| 6 | 0.412755000  | 4.456442000  | -8.234896000 | 6 | -7.881842000 | -3.148445000 | -3.656197000 |
| 1 | -0.457070000 | 2.527892000  | -8.748288000 | 6 | -7.210427000 | -1.982425000 | -2.963313000 |
| 1 | -0.841260000 | 3.067938000  | -7.107117000 | 6 | -7.202587000 | -0.701261000 | -3.533501000 |
| 1 | 1.284083000  | 4.405244000  | -8.902148000 | 6 | -6.582129000 | -2.148627000 | -1.713823000 |
| 1 | -0.394420000 | 4.906558000  | -8.824078000 | 6 | -6.594236000 | 0.381317000  | -2.885903000 |
| 6 | 0.723621000  | 5.350814000  | -7.047955000 | 6 | -5.971200000 | -1.081915000 | -1.053406000 |
| 6 | 1.968303000  | 5.291028000  | -6.396148000 | 6 | -5.981412000 | 0.185997000  | -1.644747000 |
| 6 | -0.239985000 | 6.262440000  | -6.583755000 | 8 | -5.358217000 | 1.226725000  | -0.941777000 |
| 6 | 2.234722000  | 6.122624000  | -5.302127000 | 1 | -8.260231000 | -2.861240000 | -4.642453000 |
| 6 | 0.029001000  | 7.097617000  | -5.493244000 | 1 | -8.731877000 | -3.526804000 | -3.073730000 |
| 6 | 1.268817000  | 7.027842000  | -4.846915000 | 1 | -7.680632000 | -0.541564000 | -4.495908000 |
| 1 | 2.735379000  | 4.601955000  | -6.736952000 | 1 | -6.581606000 | -3.127276000 | -1.241641000 |
| 1 | -1.199943000 | 6.330563000  | -7.089285000 | 1 | -6.601680000 | 1.364500000  | -3.347255000 |
| 1 | 3.204831000  | 6.070586000  | -4.817190000 | 1 | -5.496636000 | -1.221466000 | -0.088339000 |
| 1 | -0.719551000 | 7.810714000  | -5.161999000 | 1 | -5.494861000 | 2.099856000  | -1.372984000 |
| 1 | 1.483635000  | 7.681686000  | -4.007488000 | 1 | -7.189601000 | -3.988248000 | -3.797071000 |
| 7 | 1.794601000  | -3.176161000 | -1.126749000 | 6 | -9.049793000 | -4.051789000 | 4.908285000  |
| 6 | 1.668969000  | -4.465470000 | -0.799457000 | 6 | -7.836056000 | -3.545227000 | 4.159336000  |
| 7 | 2.558426000  | -5.206825000 | -1.525036000 | 6 | -7.288561000 | -2.279180000 | 4.423019000  |
| 6 | 3.289613000  | -4.353449000 | -2.359226000 | 6 | -7.231255000 | -4.320552000 | 3.151395000  |
| 6 | 2.800173000  | -3.094404000 | -2.095803000 | 6 | -6.184572000 | -1.792559000 | 3.711695000  |
| 6 | 4.345826000  | -4.816084000 | -3.306318000 | 6 | -6.129634000 | -3.851456000 | 2.433717000  |
| 1 | 3.935860000  | -5.453123000 | -4.100304000 | 6 | -5.600271000 | -2.581769000 | 2.709737000  |
| 1 | 4.808325000  | -3.944577000 | -3.776583000 | 8 | -4.519437000 | -2.152313000 | 1.955879000  |
| 1 | 3.097681000  | -2.167846000 | -2.552223000 | 1 | -9.263559000 | -3.433291000 | 5.786154000  |
| 1 | 2.661134000  | -6.208539000 | -1.475383000 | 1 | -8.911982000 | -5.084126000 | 5.251881000  |
| 1 | 0.965862000  | -4.855434000 | -0.085131000 | 1 | -7.743028000 | -1.651476000 | 5.185349000  |
| 1 | 5.133369000  | -5.386224000 | -2.797518000 | 1 | -7.632574000 | -5.304628000 | 2.923874000  |
| 8 | -0.600324000 | -3.197691000 | 0.382130000  | 1 | -5.791937000 | -0.802717000 | 3.919213000  |
| 6 | -1.447497000 | -2.830912000 | -0.541423000 | 1 | -5.668242000 | -4.453733000 | 1.658790000  |
| 8 | -1.069178000 | -1.861279000 | -1.323802000 | 1 | -4.084490000 | -1.325324000 | 2.321738000  |
| 6 | -2.791983000 | -3.461799000 | -0.650616000 | 1 | -9.946792000 | -4.040531000 | 4.274731000  |
| 1 | -3.414881000 | -3.114217000 | 0.186677000  | 6 | 0.950664000  | 2.924329000  | 6.069047000  |
| 1 | -3.273389000 | -3.186360000 | -1.589631000 | 6 | 1.481123000  | 2.943047000  | 4.626692000  |
| 1 | -2.705326000 | -4.549719000 | -0.569083000 | 6 | 0.727193000  | 3.952746000  | 3.738374000  |
| 7 | -0.501847000 | -0.588491000 | 5.040163000  | 6 | 1.196638000  | 3.970140000  | 2.275934000  |
| 6 | -1.262005000 | -1.538596000 | 5.602727000  | 7 | 0.700532000  | 2.779027000  | 1.536089000  |
| 7 | -2.599223000 | -1.465563000 | 5.491926000  | 1 | -0.105772000 | 2.632846000  | 6.088956000  |
| 7 | -0.688047000 | -2.553019000 | 6.292778000  | 1 | 1.036442000  | 3.914553000  | 6.533818000  |
| 6 | 0.746277000  | -2.605205000 | 6.618764000  | 1 | 1.399822000  | 1.931656000  | 4.204108000  |
| 6 | 1.013694000  | -3.636475000 | 7.716399000  | 1 | 2.552553000  | 3.195522000  | 4.628243000  |
| 1 | 0.467039000  | -3.386721000 | 8.631472000  | 1 | -0.345439000 | 3.724709000  | 3.763227000  |
| 1 | 2.081528000  | -3.662975000 | 7.953392000  | 1 | 0.859095000  | 4.959943000  | 4.157314000  |
| 1 | 1.058989000  | -1.607788000 | 6.949812000  | 1 | 2.297066000  | 4.038048000  | 2.246170000  |
| 1 | 1.329858000  | -2.851128000 | 5.720041000  | 1 | 0.806715000  | 4.860721000  | 1.769440000  |
| 1 | -1.267582000 | -3.336886000 | 6.569661000  | 1 | 0.785884000  | 1.916102000  | 2.071193000  |
| 1 | -0.949362000 | 0.241619000  | 4.618531000  | 1 | 1.144337000  | 2.653643000  | 0.627529000  |
| 1 | 0.455465000  | -0.763749000 | 4.753668000  | 1 | -1.004892000 | 2.642901000  | 1.252146000  |
| 1 | -3.201574000 | -2.093676000 | 6.006237000  | 1 | 1.508524000  | 2.214867000  | 6.691310000  |
| 1 | -3.001168000 | -0.885508000 | 4.739785000  | 6 | -4.442536000 | 3.380241000  | 5.307869000  |
| 1 | 0.717097000  | -4.642479000 | 7.398489000  | 6 | -5.466189000 | 3.622044000  | 4.218590000  |
| 8 | -0.172523000 | -0.407378000 | 1.040298000  | 6 | -5.711924000 | 2.644258000  | 3.236072000  |
| 6 | -4.588697000 | -2.935243000 | 9.597633000  | 6 | -6.206558000 | 4.816315000  | 4.169162000  |
| 6 | -4.102640000 | -3.752362000 | 8.421184000  | 6 | -6.670676000 | 2.851408000  | 2.236308000  |
| 6 | -2.991047000 | -4.605537000 | 8.542506000  | 6 | -7.171341000 | 5.025652000  | 3.175844000  |
| 6 | -4.774379000 | -3.706744000 | 7.183532000  | 6 | -7.407142000 | 4.043612000  | 2.205640000  |
| 6 | -2.569467000 | -5.398046000 | 7.464673000  | 1 | -4.125490000 | 4.320078000  | 5.772295000  |
| 6 | -4.354930000 | -4.492919000 | 6.100781000  | 1 | -3.552867000 | 2.871512000  | 4.919697000  |
| 6 | -3.248183000 | -5.342122000 | 6.238909000  | 1 | -5.146014000 | 1.717081000  | 3.253465000  |
| 1 | -5.020373000 | -1.981963000 | 9.275086000  | 1 | -6.030037000 | 5.583698000  | 4.918190000  |
| 1 | -3.778383000 | -2.720394000 | 10.301736000 | 1 | -6.827570000 | 2.088634000  | 1.479673000  |

|              |              |              |              |   |              |              |              |
|--------------|--------------|--------------|--------------|---|--------------|--------------|--------------|
| 1            | -7.739148000 | 5.951282000  | 3.162829000  | 8 | 7.149019000  | 1.838460000  | 2.534094000  |
| 1            | -8.162422000 | 4.201212000  | 1.441426000  | 6 | 7.158461000  | 0.058895000  | 0.920725000  |
| 1            | -4.856012000 | 2.747307000  | 6.105217000  | 7 | 7.027318000  | 0.857536000  | -0.292637000 |
| 6            | 6.884345000  | 4.995456000  | -5.308749000 | 1 | 4.418263000  | -0.755346000 | 4.891959000  |
| 6            | 7.252071000  | 4.290309000  | -4.022357000 | 1 | 3.409824000  | 0.594716000  | 5.363177000  |
| 6            | 6.618451000  | 4.619380000  | -2.808674000 | 1 | 4.100790000  | 1.859323000  | 3.298699000  |
| 6            | 8.215660000  | 3.264483000  | -4.009450000 | 1 | 4.887940000  | -0.333102000 | 2.097170000  |
| 6            | 6.922566000  | 3.935101000  | -1.625707000 | 1 | 5.467031000  | 1.482112000  | 4.348967000  |
| 6            | 8.526746000  | 2.580135000  | -2.826905000 | 1 | 6.658847000  | -0.893938000 | 0.740870000  |
| 6            | 7.876671000  | 2.905861000  | -1.626691000 | 1 | 7.330605000  | 1.826803000  | -0.247511000 |
| 1            | 6.557237000  | 6.023740000  | -5.121103000 | 1 | 8.214605000  | -0.134769000 | 1.141089000  |
| 1            | 7.732848000  | 5.033612000  | -5.999966000 | 6 | 6.513986000  | 0.362756000  | -1.438853000 |
| 1            | 5.889639000  | 5.425395000  | -2.793090000 | 8 | 6.221362000  | -0.826532000 | -1.606008000 |
| 1            | 8.733866000  | 3.011245000  | -4.930288000 | 6 | 6.219112000  | 1.397609000  | -2.537137000 |
| 1            | 6.431008000  | 4.213277000  | -0.698135000 | 6 | 4.973816000  | 2.260036000  | -2.147925000 |
| 1            | 9.285512000  | 1.803249000  | -2.837716000 | 6 | 3.782248000  | 1.449066000  | -1.751520000 |
| 1            | 8.104993000  | 2.367530000  | -0.712869000 | 6 | 3.315683000  | 1.095947000  | -0.506836000 |
| 1            | 6.063872000  | 4.471307000  | -5.816985000 | 7 | 2.953089000  | 0.793117000  | -2.644199000 |
| 8            | -1.629578000 | 1.412249000  | 3.496491000  | 6 | 2.047493000  | 0.083477000  | -1.930903000 |
| 6            | -2.457128000 | 0.800546000  | 2.744995000  | 7 | 2.240798000  | 0.241808000  | -0.628757000 |
| 8            | -3.297831000 | -0.102455000 | 3.132915000  | 1 | 7.067294000  | 2.077292000  | -2.672361000 |
| 6            | -2.393514000 | 1.044636000  | 1.226131000  | 1 | 5.254272000  | 2.914613000  | -1.317512000 |
| 7            | -1.941884000 | 2.317726000  | 0.851542000  | 1 | 4.753903000  | 2.906579000  | -3.002740000 |
| 6            | -2.593770000 | 3.139239000  | -0.164929000 | 1 | 3.690900000  | 1.386538000  | 0.463321000  |
| 1            | -3.302200000 | 0.743229000  | 0.704863000  | 1 | 3.002934000  | 0.827828000  | -3.666860000 |
| 1            | -1.464823000 | 0.289375000  | 0.995436000  | 1 | 1.279961000  | -0.533807000 | -2.374007000 |
| 1            | 0.172154000  | -0.476526000 | 1.971184000  | 7 | 5.990754000  | 0.647245000  | -3.757529000 |
| 1            | -1.809664000 | 3.588766000  | -0.784392000 | 6 | 5.864034000  | 1.222626000  | -4.974476000 |
| 6            | -3.761730000 | 6.583878000  | -0.376366000 | 8 | 6.007327000  | 2.425712000  | -5.184718000 |
| 6            | -4.370691000 | 5.133059000  | -0.406884000 | 6 | 5.530879000  | 0.242323000  | -6.114844000 |
| 6            | -3.438847000 | 4.248177000  | 0.526036000  | 7 | 4.558770000  | 0.796217000  | -7.036722000 |
| 6            | -3.172390000 | 6.651450000  | 1.057243000  | 1 | 5.826983000  | -0.344130000 | -3.611869000 |
| 6            | -2.553495000 | 5.261925000  | 1.314102000  | 1 | 5.152090000  | -0.704700000 | -5.717127000 |
| 6            | -2.638002000 | 6.729869000  | -1.441743000 | 1 | 6.447700000  | 0.033100000  | -6.674030000 |
| 6            | -4.677605000 | 4.653001000  | -1.814308000 | 1 | 4.889128000  | 1.178741000  | -7.910872000 |
| 6            | -4.851411000 | 7.652578000  | -0.590514000 | 6 | 3.284745000  | 1.065587000  | -6.639906000 |
| 6            | -3.074787000 | 6.302522000  | -2.855559000 | 8 | 2.884076000  | 0.764354000  | -5.511817000 |
| 6            | -3.597967000 | 4.845882000  | -2.863623000 | 6 | 2.396987000  | 1.739214000  | -7.674787000 |
| 6            | -5.902264000 | 4.191355000  | -2.140243000 | 6 | 2.663544000  | 3.262966000  | -7.825673000 |
| 1            | -5.326684000 | 5.185159000  | 0.129564000  | 1 | 2.543834000  | 1.255651000  | -8.649060000 |
| 1            | -1.520908000 | 5.231434000  | 0.940173000  | 1 | 1.361822000  | 1.571583000  | -7.366895000 |
| 1            | -2.510602000 | 5.017976000  | 2.380152000  | 1 | 3.722110000  | 3.424372000  | -8.064851000 |
| 1            | -5.629585000 | 7.566930000  | 0.177190000  | 1 | 2.093044000  | 3.605700000  | -8.696686000 |
| 1            | -5.338252000 | 7.555531000  | -1.567031000 | 6 | 2.280605000  | 4.086976000  | -6.613646000 |
| 1            | -4.424058000 | 8.660758000  | -0.525537000 | 6 | 3.206267000  | 4.340513000  | -5.592012000 |
| 1            | -2.230413000 | 6.389170000  | -3.550521000 | 6 | 0.986924000  | 4.613660000  | -6.495843000 |
| 1            | -3.861468000 | 6.971328000  | -3.227448000 | 6 | 2.841006000  | 5.098763000  | -4.477302000 |
| 1            | -2.749447000 | 4.173397000  | -2.673084000 | 6 | 0.620252000  | 5.370644000  | -5.381614000 |
| 1            | -3.987550000 | 4.584790000  | -3.854392000 | 6 | 1.548205000  | 5.614499000  | -4.366897000 |
| 1            | -6.157705000 | 3.923868000  | -3.162621000 | 1 | 4.216654000  | 3.946319000  | -5.668269000 |
| 1            | -4.102272000 | 3.722461000  | 1.220314000  | 1 | 0.264335000  | 4.442578000  | -7.291604000 |
| 1            | -6.705218000 | 4.135625000  | -1.409036000 | 1 | 3.574786000  | 5.298568000  | -3.700333000 |
| 1            | -2.447702000 | 7.466877000  | 1.169821000  | 1 | -0.383574000 | 5.782406000  | -5.314992000 |
| 1            | -1.767286000 | 6.126903000  | -1.146270000 | 1 | 1.269851000  | 6.213961000  | -3.503881000 |
| 1            | -2.298150000 | 7.774473000  | -1.453404000 | 7 | 2.739770000  | -2.588467000 | 0.723076000  |
| 1            | -3.986618000 | 6.835056000  | 1.770705000  | 6 | 2.637055000  | -3.767656000 | 1.309639000  |
| 1            | -3.226566000 | 2.496080000  | -0.781797000 | 7 | 3.735344000  | -4.523013000 | 1.047442000  |
|              |              |              |              | 6 | 4.596471000  | -3.786604000 | 0.245287000  |
|              |              |              |              | 6 | 3.953828000  | -2.588761000 | 0.058976000  |
|              |              |              |              | 6 | 5.907351000  | -4.296089000 | -0.256822000 |
|              |              |              |              | 1 | 5.785039000  | -5.163442000 | -0.918168000 |
|              |              |              |              | 1 | 6.402672000  | -3.504112000 | -0.824799000 |
|              |              |              |              | 1 | 4.292374000  | -1.745190000 | -0.523271000 |
|              |              |              |              | 1 | 3.895718000  | -5.464401000 | 1.377604000  |
|              |              |              |              | 1 | 1.796113000  | -4.089565000 | 1.905011000  |
|              |              |              |              | 1 | 6.573700000  | -4.595458000 | 0.562317000  |
|              |              |              |              | 8 | -0.147067000 | -2.552659000 | 1.703864000  |
| <b>5IM2:</b> |              |              |              |   |              |              |              |
| 26           | 1.333092000  | -0.908444000 | 0.998563000  |   |              |              |              |
| 8            | 2.470034000  | -0.108184000 | 2.510650000  |   |              |              |              |
| 6            | 2.636364000  | -0.530538000 | 3.723616000  |   |              |              |              |
| 8            | 1.923507000  | -1.360012000 | 4.307627000  |   |              |              |              |
| 6            | 3.823401000  | 0.073921000  | 4.490306000  |   |              |              |              |
| 6            | 4.707093000  | 1.037734000  | 3.701744000  |   |              |              |              |
| 7            | 5.414770000  | 0.355444000  | 2.620595000  |   |              |              |              |
| 6            | 6.574887000  | 0.840065000  | 2.106697000  |   |              |              |              |

|   |               |               |              |   |               |              |              |
|---|---------------|---------------|--------------|---|---------------|--------------|--------------|
| 6 | -0.682272000  | -2.451341000  | 0.569208000  | 1 | -6.219531000  | -3.217621000 | -1.591784000 |
| 8 | -0.265730000  | -1.558601000  | -0.261422000 | 1 | -4.656718000  | -1.177169000 | 0.843998000  |
| 6 | -1.818183000  | -3.357986000  | 0.151673000  | 1 | -10.724808000 | -3.904299000 | 0.532515000  |
| 1 | -2.753267000  | -2.788298000  | 0.091867000  | 6 | -2.680627000  | 2.795537000  | -5.068073000 |
| 1 | -1.621643000  | -3.765692000  | -0.845186000 | 6 | -2.095168000  | 1.887225000  | -3.981650000 |
| 1 | -1.946737000  | -4.169499000  | 0.870717000  | 6 | -3.169071000  | 1.104054000  | -3.212289000 |
| 7 | -0.917958000  | -1.608323000  | 4.481264000  | 6 | -2.624845000  | 0.104465000  | -2.189177000 |
| 6 | -1.591647000  | -2.759299000  | 4.409335000  | 7 | -1.897717000  | 0.749916000  | -1.064186000 |
| 7 | -2.865321000  | -2.766404000  | 3.983707000  | 1 | -3.370148000  | 3.534799000  | -4.640677000 |
| 7 | -1.041769000  | -3.901458000  | 4.859447000  | 1 | -3.240938000  | 2.214641000  | -5.810344000 |
| 6 | 0.303869000   | -3.995887000  | 5.430194000  | 1 | -1.500695000  | 2.502938000  | -3.290996000 |
| 6 | 0.478409000   | -5.325022000  | 6.158590000  | 1 | -1.390377000  | 1.178455000  | -4.439174000 |
| 1 | -0.242317000  | -5.427058000  | 6.976923000  | 1 | -3.857320000  | 1.804918000  | -2.717301000 |
| 1 | 1.485430000   | -5.387812000  | 6.581771000  | 1 | -3.781481000  | 0.541914000  | -3.930034000 |
| 1 | 0.439777000   | -3.159035000  | 6.122496000  | 1 | -1.966395000  | -0.615847000 | -2.695223000 |
| 1 | 1.059923000   | -3.876610000  | 4.644834000  | 1 | -3.450716000  | -0.466529000 | -1.751610000 |
| 1 | -1.527702000  | -4.763132000  | 4.639582000  | 1 | -1.160628000  | 1.358436000  | -1.423342000 |
| 1 | -1.369901000  | -0.792146000  | 4.061092000  | 1 | -1.385162000  | 0.011036000  | -0.565681000 |
| 1 | 0.106579000   | -1.617597000  | 4.391875000  | 1 | -2.789510000  | 1.560388000  | -0.033601000 |
| 1 | -3.394609000  | -5.3629211000 | 3.973262000  | 1 | -1.888573000  | 3.340544000  | -5.592627000 |
| 1 | -3.201364000  | -2.003953000  | 3.386415000  | 6 | -2.324058000  | 3.300591000  | 5.585529000  |
| 1 | 0.350340000   | -6.175930000  | 5.477963000  | 6 | -3.768770000  | 3.126842000  | 5.179861000  |
| 8 | 0.154957000   | 1.018672000   | 1.511912000  | 6 | -4.416699000  | 1.894942000  | 5.366479000  |
| 6 | -5.307229000  | -5.636741000  | 6.310087000  | 6 | -4.494251000  | 4.171535000  | 4.590808000  |
| 6 | -4.658987000  | -5.866648000  | 4.964543000  | 6 | -5.741740000  | 1.711486000  | 4.969690000  |
| 6 | -3.490139000  | -6.636981000  | 4.849128000  | 6 | -5.823170000  | 3.991877000  | 4.190722000  |
| 6 | -5.225930000  | -5.345955000  | 3.790388000  | 6 | -6.453160000  | 2.759088000  | 4.374461000  |
| 6 | -2.915110000  | -6.890626000  | 3.599550000  | 1 | -1.994227000  | 4.337613000  | 5.466114000  |
| 6 | -4.653091000  | -5.593252000  | 2.538258000  | 1 | -1.676374000  | 2.661945000  | 4.972453000  |
| 6 | -3.495985000  | -6.369662000  | 2.438903000  | 1 | -3.872365000  | 1.072319000  | 5.824326000  |
| 1 | -5.839637000  | -4.680575000  | 6.342426000  | 1 | -4.016738000  | 5.139885000  | 4.454984000  |
| 1 | -4.569932000  | -5.643802000  | 7.119664000  | 1 | -6.223228000  | 0.749897000  | 5.127287000  |
| 1 | -3.040584000  | -7.059229000  | 5.745453000  | 1 | -6.370814000  | 4.816433000  | 3.741697000  |
| 1 | -6.129974000  | -4.744460000  | 3.849953000  | 1 | -7.484162000  | 2.619597000  | 4.064715000  |
| 1 | -2.023557000  | -7.509482000  | 3.531687000  | 1 | -2.165026000  | 3.016383000  | 6.632378000  |
| 1 | -5.115396000  | -5.178090000  | 1.646957000  | 6 | 8.254188000   | 5.099788000  | -4.046149000 |
| 1 | -3.055877000  | -6.574212000  | 1.467077000  | 6 | 8.280353000   | 4.780134000  | -2.569568000 |
| 1 | -6.039569000  | -6.424240000  | 6.530660000  | 6 | 7.300765000   | 5.290799000  | -1.703001000 |
| 6 | -11.432610000 | 1.523352000   | 3.565887000  | 6 | 9.262383000   | 3.937118000  | -2.028555000 |
| 6 | -10.322449000 | 2.082248000   | 2.705337000  | 6 | 7.289208000   | 4.955848000  | -0.347591000 |
| 6 | -10.097543000 | 3.460728000   | 2.612038000  | 6 | 9.258223000   | 3.601211000  | -0.671410000 |
| 6 | -9.497490000  | 1.236119000   | 1.946654000  | 6 | 8.266523000   | 4.102972000  | 0.178371000  |
| 6 | -9.093538000  | 3.984022000   | 1.792887000  | 1 | 7.854335000   | 6.102615000  | -4.231307000 |
| 6 | -8.491627000  | 1.739092000   | 1.125819000  | 1 | 9.256627000   | 5.049683000  | -4.484197000 |
| 6 | -8.286833000  | 3.120640000   | 1.047538000  | 1 | 6.541936000   | 5.963099000  | -2.098052000 |
| 8 | -7.279001000  | 3.567600000   | 0.228638000  | 1 | 10.044054000  | 3.546243000  | -2.676318000 |
| 1 | -11.748230000 | 2.241860000   | 4.329430000  | 1 | 6.524825000   | 5.370004000  | 0.305245000  |
| 1 | -11.122402000 | 0.604893000   | 4.077202000  | 1 | 10.037123000  | 2.955083000  | -0.273957000 |
| 1 | -10.718428000 | 4.144823000   | 3.185846000  | 1 | 8.251371000   | 3.827917000  | 1.228863000  |
| 1 | -9.641247000  | 0.159017000   | 1.995791000  | 1 | 7.618606000   | 4.384770000  | -4.584811000 |
| 1 | -8.945041000  | 5.060547000   | 1.732656000  | 8 | -2.111767000  | 0.673125000  | 3.065040000  |
| 1 | -7.860763000  | 1.072641000   | 0.545331000  | 6 | -3.170007000  | 0.464400000  | 2.423627000  |
| 1 | -7.187910000  | 4.534792000   | 0.303038000  | 8 | -3.804258000  | -0.608034000 | 2.287953000  |
| 1 | -12.318303000 | 1.274364000   | 2.966362000  | 6 | -3.783693000  | 1.706160000  | 1.803834000  |
| 6 | -9.900268000  | -4.350922000  | 1.103712000  | 7 | -3.477728000  | 2.138042000  | 0.637346000  |
| 6 | -8.593777000  | -3.635219000  | 0.846261000  | 6 | -4.004576000  | 3.410098000  | 0.101931000  |
| 6 | -8.013880000  | -2.800008000  | 1.808287000  | 1 | -4.496977000  | 2.264913000  | 2.412902000  |
| 6 | -7.923582000  | -3.771885000  | -0.379833000 | 1 | 0.884651000   | 1.317619000  | 2.083103000  |
| 6 | -6.816235000  | -2.119712000  | 1.567021000  | 1 | -0.615162000  | 0.900682000  | 2.113303000  |
| 6 | -6.729379000  | -3.104609000  | -0.639534000 | 1 | -3.984331000  | 3.312200000  | -0.986503000 |
| 6 | -6.166583000  | -2.269752000  | 0.334976000  | 6 | -2.521194000  | 6.720913000  | -0.618427000 |
| 8 | -4.996742000  | -1.629426000  | 0.038874000  | 6 | -3.664315000  | 6.043362000  | 0.220634000  |
| 1 | -10.176450000 | -4.309882000  | 2.162573000  | 6 | -3.140438000  | 4.588492000  | 0.578838000  |
| 1 | -9.846028000  | -5.407066000  | 0.814010000  | 6 | -1.258232000  | 5.998814000  | -0.094607000 |
| 1 | -8.506871000  | -2.672038000  | 2.770252000  | 6 | -1.676391000  | 4.531282000  | 0.071076000  |
| 1 | -8.345490000  | -4.415653000  | -1.148799000 | 6 | -2.696758000  | 6.454120000  | -2.137044000 |
| 1 | -6.385376000  | -1.473468000  | 2.327125000  | 6 | -5.041123000  | 6.201032000  | -0.404913000 |

|   |              |             |              |   |              |              |               |
|---|--------------|-------------|--------------|---|--------------|--------------|---------------|
| 6 | -2.463295000 | 8.233292000 | -0.350114000 | 6 | 1.929433000  | -0.671353000 | -7.459440000  |
| 6 | -4.102726000 | 6.767593000 | -2.663303000 | 8 | 1.732447000  | -0.755176000 | -6.243465000  |
| 6 | -5.161757000 | 5.956551000 | -1.893658000 | 6 | 0.851343000  | -0.236052000 | -8.437461000  |
| 6 | -6.079552000 | 6.659471000 | 0.313020000  | 6 | 0.992146000  | 1.244419000  | -8.885835000  |
| 1 | -3.700244000 | 6.574179000 | 1.178928000  | 1 | 0.876354000  | -0.880807000 | -9.325168000  |
| 1 | -1.635729000 | 4.017976000 | -0.898425000 | 1 | -0.109699000 | -0.384217000 | -7.938539000  |
| 1 | -1.021515000 | 3.969003000 | 0.745151000  | 1 | 1.971537000  | 1.389523000  | -9.358027000  |
| 1 | -2.300429000 | 8.434653000 | 0.715511000  | 1 | 0.242678000  | 1.416595000  | -9.667427000  |
| 1 | -3.389563000 | 8.739650000 | -0.642234000 | 6 | 0.808210000  | 2.255814000  | -7.772677000  |
| 1 | -1.640072000 | 8.697243000 | -0.906505000 | 6 | 1.914059000  | 2.814814000  | -7.117913000  |
| 1 | -4.163620000 | 6.533016000 | -3.732904000 | 6 | -0.477628000 | 2.654007000  | -7.381351000  |
| 1 | -4.321487000 | 7.837787000 | -2.564640000 | 6 | 1.735194000  | 3.756432000  | -6.101331000  |
| 1 | -5.015102000 | 4.890583000 | -2.120545000 | 6 | -0.658774000 | 3.588967000  | -6.3581736000 |
| 1 | -6.171087000 | 6.210030000 | -2.236222000 | 6 | 0.449768000  | 4.146909000  | -5.720862000  |
| 1 | -7.044100000 | 6.864414000 | -0.149179000 | 1 | 2.918732000  | 2.510252000  | -7.398880000  |
| 1 | -3.138644000 | 4.524344000 | 1.674396000  | 1 | -1.345986000 | 2.236888000  | -7.887522000  |
| 1 | -5.986614000 | 6.902202000 | 1.369394000  | 1 | 2.604831000  | 4.195470000  | -5.618290000  |
| 1 | -0.397771000 | 6.122856000 | -0.763047000 | 1 | -1.663561000 | 3.890571000  | -6.078156000  |
| 1 | -2.476180000 | 5.401125000 | -2.360144000 | 1 | 0.311763000  | 4.891822000  | -4.941211000  |
| 1 | -1.948259000 | 7.043257000 | -2.683290000 | 7 | 2.281761000  | -2.511757000 | -0.4421608000 |
| 1 | -0.974013000 | 6.419862000 | 0.879229000  | 6 | 2.316888000  | -3.482580000 | 1.336092000   |
| 1 | -5.046694000 | 3.508754000 | 0.413785000  | 7 | 3.413610000  | -4.259273000 | 1.144103000   |

**<sup>5</sup>TS3i:**

|    |             |              |              |   |              |              |              |
|----|-------------|--------------|--------------|---|--------------|--------------|--------------|
| 26 | 0.805444000 | -0.835458000 | 0.474436000  | 6 | 4.128833000  | -3.757111000 | 0.065913000  |
| 8  | 2.246825000 | 0.106464000  | 1.526409000  | 6 | 3.404329000  | -2.669468000 | -0.352097000 |
| 6  | 2.610016000 | -0.187894000 | 2.731990000  | 6 | 5.389257000  | -4.366646000 | -0.453678000 |
| 8  | 2.070388000 | -1.034983000 | 3.459058000  | 1 | 5.221413000  | -5.373231000 | -0.857576000 |
| 6  | 3.808114000 | 0.605170000  | 3.275504000  | 1 | 5.782852000  | -3.739685000 | -1.257988000 |
| 6  | 4.587354000 | 1.422694000  | 2.248775000  | 1 | 3.623111000  | -2.015070000 | -1.181202000 |
| 7  | 5.243987000 | 0.565167000  | 1.264278000  | 1 | 3.665844000  | -5.067020000 | 1.696062000  |
| 6  | 6.322196000 | 0.990490000  | 0.553948000  | 1 | 1.587115000  | -3.631822000 | 2.115734000  |
| 8  | 6.862412000 | 2.080117000  | 0.722581000  | 1 | 6.158330000  | -4.446331000 | 0.325253000  |
| 6  | 6.839431000 | 0.019695000  | -0.518049000 | 8 | -0.399571000 | -2.247584000 | 1.426212000  |
| 7  | 6.482434000 | 0.524512000  | -1.838598000 | 6 | -0.885086000 | -2.670136000 | 0.313880000  |
| 1  | 4.465938000 | -0.099756000 | 3.796313000  | 8 | -0.448719000 | -2.171316000 | -0.762526000 |
| 1  | 3.416457000 | 1.281241000  | 4.046941000  | 6 | -1.976849000 | -3.702623000 | 0.316019000  |
| 1  | 3.914604000 | 2.130485000  | 1.747705000  | 1 | -2.930727000 | -3.179221000 | 0.458759000  |
| 1  | 4.736802000 | -0.251712000 | 0.946644000  | 1 | -2.000845000 | -4.237070000 | -0.636314000 |
| 1  | 5.371622000 | 2.007678000  | 2.735335000  | 1 | -1.843049000 | -4.400035000 | 1.147526000  |
| 1  | 6.422079000 | -0.984263000 | -0.429686000 | 7 | -0.443731000 | -0.976558000 | 4.855202000  |
| 1  | 6.758912000 | 1.476894000  | -2.062412000 | 6 | -1.150955000 | -2.107218000 | 4.959102000  |
| 1  | 7.928355000 | -0.038818000 | -0.414490000 | 7 | -2.487133000 | -2.070267000 | 4.850368000  |
| 6  | 5.794653000 | -0.206874000 | -2.742245000 | 7 | -0.526403000 | -3.262332000 | 5.253485000  |
| 8  | 5.499055000 | -1.396619000 | -2.587360000 | 6 | 0.874943000  | -3.345234000 | 5.678753000  |
| 6  | 5.309996000 | 0.561141000  | -3.981144000 | 6 | 1.200586000  | -4.755175000 | 6.161991000  |
| 6  | 4.096773000 | 1.477310000  | -3.611402000 | 1 | 0.576167000  | -5.038895000 | 7.016201000  |
| 6  | 2.990348000 | 0.767854000  | -2.897325000 | 1 | 2.246853000  | -4.807414000 | 6.477659000  |
| 6  | 2.704683000 | 0.675857000  | -1.556188000 | 1 | 1.040631000  | -2.617403000 | 6.482583000  |
| 7  | 2.055111000 | -0.041703000 | -3.521742000 | 1 | 1.533553000  | -3.060426000 | 4.850534000  |
| 6  | 1.261192000 | -0.585482000 | -2.577607000 | 1 | -1.081400000 | -4.110483000 | 5.257703000  |
| 7  | 1.632982000 | -0.173534000 | -1.370742000 | 1 | -0.957885000 | -0.115136000 | 4.633118000  |
| 1  | 6.101619000 | 1.208076000  | -4.374265000 | 1 | 0.506695000  | -1.024336000 | 4.479067000  |
| 1  | 4.463731000 | 2.293644000  | -2.981902000 | 1 | -3.024015000 | -2.922383000 | 4.961569000  |
| 1  | 3.741533000 | 1.927283000  | -4.543379000 | 1 | -2.896382000 | -1.324689000 | 4.267843000  |
| 1  | 3.203938000 | 1.134636000  | -0.716973000 | 1 | 1.050725000  | -5.494769000 | 5.366405000  |
| 1  | 1.973132000 | -0.220655000 | -4.528701000 | 8 | -0.371507000 | 0.480150000  | 0.558917000  |
| 1  | 0.444001000 | -1.262340000 | -2.772559000 | 6 | -4.362241000 | -4.839481000 | 7.883557000  |
| 7  | 4.955667000 | -0.431543000 | -4.976280000 | 6 | -3.912186000 | -5.211081000 | 6.489728000  |
| 6  | 4.689717000 | -0.121210000 | -6.266822000 | 6 | -2.775908000 | -6.008540000 | 6.284373000  |
| 8  | 4.781866000 | 1.013569000  | -6.729886000 | 6 | -4.640900000 | -4.796865000 | 5.362763000  |
| 6  | 4.267267000 | -1.312757000 | -7.145207000 | 6 | -2.386770000 | -6.390544000 | 4.995516000  |
| 7  | 3.141281000 | -0.977376000 | -7.996067000 | 6 | -4.254719000 | -5.170146000 | 4.071315000  |
| 1  | 4.828384000 | -1.369747000 | -4.611254000 | 6 | 3.124618000  | -5.971128000 | 3.884373000  |
| 1  | 4.011133000 | -2.182738000 | -6.531911000 | 1 | -4.800027000 | -3.836008000 | 7.911181000  |
| 1  | 5.109389000 | -1.584710000 | -7.788174000 | 1 | -3.532326000 | -4.868713000 | 8.596935000  |
| 1  | 3.312436000 | -0.781356000 | -8.971703000 | 1 | -2.202864000 | -6.350665000 | 7.143530000  |
|    |             |              |              | 1 | -5.527704000 | -4.180742000 | 5.491222000  |
|    |             |              |              | 1 | -1.516742000 | -7.029396000 | 4.863243000  |



|   |              |              |              |   |               |              |              |
|---|--------------|--------------|--------------|---|---------------|--------------|--------------|
| 1 | 4.162431000  | -0.031114000 | 3.921438000  | 1 | -3.119012000  | -2.612435000 | 0.557368000  |
| 1 | 3.100323000  | 1.365817000  | 3.973310000  | 1 | -2.176243000  | -3.790353000 | -0.389755000 |
| 1 | 3.881920000  | 2.124903000  | 1.743976000  | 1 | -2.110324000  | -3.795422000 | 1.408808000  |
| 1 | 4.637439000  | -0.277204000 | 1.038558000  | 7 | -0.600300000  | -0.887113000 | 4.749560000  |
| 1 | 5.240119000  | 1.967469000  | 2.860857000  | 6 | -1.282258000  | -2.034430000 | 4.822148000  |
| 1 | 6.414055000  | -1.165709000 | -0.133194000 | 7 | -2.607027000  | -2.041192000 | 4.617726000  |
| 1 | 6.982179000  | 1.266435000  | -1.745262000 | 7 | -0.644904000  | -3.171637000 | 5.170751000  |
| 1 | 7.966455000  | -0.300778000 | -0.032798000 | 6 | 0.697443000   | -3.192342000 | 5.766828000  |
| 6 | 5.925358000  | -0.340351000 | -2.465770000 | 6 | 1.078881000   | -4.615688000 | 6.162013000  |
| 8 | 5.526980000  | -1.502025000 | -2.326638000 | 1 | 0.387309000   | -5.024647000 | 6.907353000  |
| 6 | 5.552185000  | 0.465607000  | -3.718803000 | 1 | 2.082361000   | -4.624258000 | 6.597754000  |
| 6 | 4.383173000  | 1.454822000  | -3.393488000 | 1 | 0.714422000   | -2.533751000 | 6.645155000  |
| 6 | 3.210037000  | 0.801633000  | -2.736307000 | 1 | 1.418837000   | -2.790973000 | 5.047793000  |
| 6 | 2.865314000  | 0.709199000  | -1.408308000 | 1 | -1.205627000  | -4.013625000 | 5.243101000  |
| 7 | 2.272517000  | 0.038659000  | -3.411574000 | 1 | -1.117000000  | -0.056629000 | 4.427676000  |
| 6 | 1.418164000  | -0.482957000 | -2.508078000 | 1 | 0.366222000   | -0.929954000 | 4.412751000  |
| 7 | 1.758785000  | -0.100238000 | -1.282061000 | 1 | -3.131318000  | -2.902145000 | 4.718243000  |
| 1 | 6.400533000  | 1.061734000  | -4.070893000 | 1 | -3.002469000  | -1.311427000 | 4.004695000  |
| 1 | 4.769696000  | 2.241828000  | -2.739087000 | 1 | 1.080098000   | -5.284211000 | 5.292980000  |
| 1 | 4.097789000  | 1.932872000  | -4.335634000 | 8 | -0.126992000  | 0.755076000  | 0.312298000  |
| 1 | 3.336843000  | 1.145711000  | -0.543341000 | 6 | -4.396339000  | -4.852172000 | 7.631177000  |
| 1 | 2.224583000  | -0.123399000 | -4.423655000 | 6 | -3.965954000  | -5.208169000 | 6.227066000  |
| 1 | 0.579430000  | -1.117390000 | -2.749526000 | 6 | -2.819972000  | -5.985035000 | 5.994477000  |
| 7 | 5.177176000  | -0.494243000 | -4.738820000 | 6 | -4.723715000  | -4.800244000 | 5.117219000  |
| 6 | 5.003313000  | -0.158522000 | -6.038778000 | 6 | -2.449147000  | -6.352078000 | 4.695776000  |
| 8 | 5.213713000  | 0.966733000  | -6.486062000 | 6 | -4.357308000  | -5.161699000 | 3.816691000  |
| 6 | 4.526484000  | -1.307037000 | -6.946243000 | 6 | -3.217284000  | -5.941892000 | 3.602385000  |
| 7 | 3.470349000  | -0.881222000 | -7.845069000 | 1 | -4.815924000  | -3.841583000 | 7.679613000  |
| 1 | 4.963014000  | -1.422278000 | -4.389121000 | 1 | -3.560988000  | -4.908619000 | 8.336491000  |
| 1 | 4.174257000  | -2.156717000 | -6.352332000 | 1 | -2.227190000  | -6.326403000 | 6.840657000  |
| 1 | 5.372652000  | -1.642237000 | -7.553091000 | 1 | -5.617772000  | -4.199732000 | 5.266022000  |
| 1 | 3.701412000  | -0.695921000 | -8.810374000 | 1 | -1.568936000  | -6.971803000 | 4.542517000  |
| 6 | 2.251409000  | -0.508916000 | -7.370342000 | 1 | -4.968060000  | -4.835171000 | 2.979604000  |
| 8 | 1.985206000  | -0.586718000 | -6.166908000 | 1 | -2.938145000  | -6.237909000 | 2.594848000  |
| 6 | 1.245965000  | -0.025366000 | -8.404044000 | 1 | -5.172307000  | -5.541778000 | 7.987973000  |
| 6 | 1.549980000  | 1.389820000  | -8.967933000 | 6 | -5.952040000  | 0.893270000  | -5.722940000 |
| 1 | 1.212992000  | -0.740292000 | -9.236474000 | 6 | -5.825146000  | 1.280482000  | -4.266879000 |
| 1 | 0.267293000  | -0.029096000 | -7.917623000 | 6 | -6.053283000  | 2.591579000  | -3.837662000 |
| 1 | 2.550786000  | 1.399026000  | -9.418515000 | 6 | -5.481028000  | 0.327706000  | -3.294115000 |
| 1 | 0.842821000  | 1.568825000  | -9.786376000 | 6 | -5.937646000  | 2.950361000  | -2.491905000 |
| 6 | 1.438745000  | 2.504429000  | -7.947541000 | 6 | -5.367865000  | 0.661170000  | -1.947071000 |
| 6 | 2.556514000  | 2.921773000  | -7.210987000 | 6 | -5.595370000  | 1.982582000  | -1.545303000 |
| 6 | 0.209318000  | 3.139665000  | -7.724069000 | 8 | -5.451776000  | 2.270272000  | -0.207147000 |
| 6 | 2.444106000  | 3.953751000  | -6.276500000 | 1 | -6.245883000  | 1.749259000  | -6.339109000 |
| 6 | 0.094771000  | 4.169630000  | -6.789281000 | 1 | -6.705307000  | 0.108581000  | -5.867086000 |
| 6 | 1.214849000  | 4.582092000  | -6.063500000 | 1 | -6.328312000  | 3.352819000  | -4.564287000 |
| 1 | 3.519167000  | 2.440777000  | -7.365169000 | 1 | -5.309819000  | -0.703686000 | -3.595911000 |
| 1 | -0.664328000 | 2.834533000  | -8.296997000 | 1 | -6.117996000  | 3.977640000  | -2.182431000 |
| 1 | 3.325396000  | 4.277925000  | -5.728064000 | 1 | -5.137039000  | -0.088394000 | -1.194968000 |
| 1 | -0.864385000 | 4.659197000  | -6.640539000 | 1 | -5.800259000  | 3.162027000  | -0.015703000 |
| 1 | 1.133798000  | 5.400096000  | -5.352336000 | 1 | -5.006068000  | 0.505591000  | -6.123013000 |
| 7 | 2.020862000  | -2.411592000 | 0.399741000  | 6 | -9.252162000  | -4.266163000 | 3.308418000  |
| 6 | 1.946221000  | -3.341235000 | 1.338454000  | 6 | -8.083034000  | -3.532702000 | 2.691285000  |
| 7 | 2.979226000  | -4.209518000 | 1.215037000  | 6 | -7.384297000  | -2.544193000 | 3.394194000  |
| 6 | 3.770977000  | -3.812791000 | 0.146054000  | 6 | -7.672618000  | -3.802061000 | 1.375502000  |
| 6 | 3.154385000  | -2.691255000 | -0.344827000 | 6 | -6.319158000  | -1.845497000 | 2.818718000  |
| 6 | 5.000211000  | -4.537449000 | -0.293670000 | 6 | -6.617668000  | -3.112806000 | 0.782741000  |
| 1 | 4.768575000  | -5.528449000 | -0.704564000 | 6 | -5.933607000  | -2.122708000 | 1.502056000  |
| 1 | 5.499327000  | -3.954076000 | -1.071881000 | 8 | -4.912705000  | -1.465631000 | 0.879602000  |
| 1 | 3.468388000  | -2.084410000 | -1.178223000 | 1 | -10.205997000 | -3.947892000 | 2.867317000  |
| 1 | 3.151728000  | -5.002218000 | 1.817224000  | 1 | -9.314443000  | -4.082809000 | 4.386238000  |
| 1 | 1.202510000  | -3.374896000 | 2.117329000  | 1 | -7.682334000  | -2.300334000 | 4.412225000  |
| 1 | 5.708535000  | -4.678155000 | 0.532552000  | 1 | -8.193711000  | -4.564555000 | 0.800015000  |
| 8 | -0.499661000 | -1.732704000 | 1.529805000  | 1 | -5.792336000  | -1.080420000 | 3.384794000  |
| 6 | -1.038960000 | -2.204148000 | 0.474798000  | 1 | -6.316653000  | -3.322971000 | -0.239564000 |
| 8 | -0.543590000 | -1.792113000 | -0.632786000 | 1 | -4.434039000  | -0.872512000 | 1.515372000  |
| 6 | -2.175912000 | -3.173295000 | 0.512015000  | 1 | -9.176240000  | -5.349836000 | 3.157540000  |



|   |              |              |              |              |              |              |              |
|---|--------------|--------------|--------------|--------------|--------------|--------------|--------------|
| 6 | -0.988400000 | 7.437674000  | -2.485908000 | 6            | -6.660172000 | 5.048349000  | 0.925965000  |
| 6 | -0.360200000 | 6.062524000  | -2.233594000 | 1            | -5.675935000 | 4.499976000  | 3.201094000  |
| 6 | -1.360454000 | 4.909036000  | -2.400734000 | 1            | -1.842336000 | 5.155990000  | 3.354209000  |
| 6 | -0.756575000 | 3.511522000  | -2.231556000 | 1            | -2.286236000 | 3.789813000  | 4.376048000  |
| 7 | -0.222452000 | 3.285189000  | -0.871305000 | 1            | -6.256661000 | 6.028918000  | 4.927880000  |
| 1 | -1.817371000 | 7.626993000  | -1.792581000 | 1            | -6.489445000 | 7.224766000  | 3.647822000  |
| 1 | -1.388000000 | 7.509416000  | -3.504883000 | 1            | -5.479029000 | 7.617407000  | 5.047253000  |
| 1 | 0.064228000  | 6.046021000  | -1.219109000 | 1            | -3.949293000 | 8.621183000  | 1.085683000  |
| 1 | 0.483298000  | 5.911984000  | -2.923390000 | 1            | -5.488663000 | 8.305444000  | 1.873710000  |
| 1 | -2.188019000 | 5.034768000  | -1.687741000 | 1            | -3.811579000 | 6.323936000  | 0.258466000  |
| 1 | -1.806799000 | 4.963359000  | -3.403299000 | 1            | -5.371575000 | 6.985107000  | -0.218429000 |
| 1 | 0.018462000  | 3.353418000  | -2.997826000 | 1            | -7.133249000 | 5.431075000  | 0.023723000  |
| 1 | -1.531980000 | 2.756014000  | -2.402579000 | 1            | -4.016126000 | 3.117480000  | 2.949762000  |
| 1 | 0.593103000  | 3.874681000  | -0.706724000 | 1            | -7.216065000 | 4.298564000  | 1.485499000  |
| 1 | 0.080091000  | 2.308574000  | -0.751898000 | 1            | -2.946779000 | 6.297428000  | 5.196405000  |
| 1 | -1.227344000 | 3.073986000  | 0.479695000  | 1            | -2.782432000 | 7.041707000  | 2.563292000  |
| 1 | -0.255859000 | 8.242214000  | -2.356707000 | 1            | -3.622755000 | 8.233397000  | 3.538622000  |
| 6 | -6.885321000 | 3.462753000  | 8.322309000  | 1            | -4.134405000 | 4.999610000  | 5.364261000  |
| 6 | -6.606996000 | 2.881367000  | 6.954786000  | 1            | -3.629037000 | 3.701868000  | 0.515155000  |
| 6 | -5.355935000 | 2.325944000  | 6.648284000  |              |              |              |              |
| 6 | -7.602717000 | 2.857706000  | 5.967034000  |              |              |              |              |
| 6 | -5.104918000 | 1.756194000  | 5.397652000  | <b>5IM3:</b> |              |              |              |
| 6 | -7.360217000 | 2.288513000  | 4.715031000  | 26           | 1.971646000  | -2.191802000 | 0.863989000  |
| 6 | -6.109013000 | 1.736938000  | 4.424582000  | 8            | 3.154228000  | -1.274860000 | 2.210719000  |
| 6 | -7.613488000 | 4.279318000  | 8.271809000  | 6            | 2.880877000  | -1.202792000 | 3.491116000  |
| 1 | -5.972782000 | 3.849988000  | 8.788112000  | 8            | 2.096493000  | -1.938642000 | 4.085677000  |
| 1 | -4.570117000 | 2.338011000  | 7.401006000  | 6            | 3.670377000  | -0.139892000 | 4.265148000  |
| 1 | -8.579350000 | 3.284933000  | 6.184440000  | 6            | 3.965222000  | 1.153778000  | 3.499725000  |
| 1 | -4.126675000 | 1.339184000  | 5.174737000  | 7            | 4.900911000  | 0.929808000  | 2.400055000  |
| 1 | -8.150115000 | 2.271906000  | 3.968013000  | 6            | 5.577270000  | 1.953239000  | 1.822231000  |
| 1 | -5.914192000 | 1.295725000  | 3.451168000  | 8            | 5.507038000  | 3.120288000  | 2.204126000  |
| 1 | -7.298144000 | 2.702837000  | 8.999414000  | 6            | 6.465980000  | 1.585438000  | 0.625588000  |
| 6 | 7.445469000  | 3.822908000  | -6.035459000 | 7            | 5.957526000  | 2.276958000  | -0.551816000 |
| 6 | 7.671684000  | 3.735866000  | -4.543978000 | 1            | 4.617723000  | -0.591999000 | 4.591721000  |
| 6 | 6.828839000  | 4.407257000  | -3.643930000 | 1            | 3.102544000  | 0.089425000  | 5.170852000  |
| 6 | 8.710914000  | 2.955685000  | -4.014970000 | 1            | 3.028746000  | 1.590997000  | 3.123714000  |
| 6 | 7.004509000  | 4.289448000  | -2.263587000 | 1            | 4.793799000  | 0.044145000  | 1.917292000  |
| 6 | 8.895104000  | 2.837927000  | -2.634099000 | 1            | 4.412655000  | 1.895008000  | 4.166812000  |
| 6 | 8.038233000  | 3.499536000  | -1.747340000 | 1            | 6.480178000  | 0.517797000  | 0.398659000  |
| 1 | 6.987805000  | 4.777951000  | -6.314974000 | 1            | 5.695627000  | 3.252443000  | -0.437363000 |
| 1 | 8.385559000  | 3.724712000  | -6.588579000 | 1            | 7.490043000  | 1.903844000  | 0.855951000  |
| 1 | 6.030719000  | 5.036037000  | -4.033372000 | 6            | 5.777832000  | 1.655253000  | -1.738188000 |
| 1 | 9.389448000  | 2.442946000  | -4.693186000 | 8            | 6.172824000  | 0.515870000  | -1.989289000 |
| 1 | 6.345031000  | 4.825773000  | -1.585845000 | 6            | 4.910011000  | 2.418061000  | -2.755387000 |
| 1 | 9.716486000  | 2.238116000  | -2.249732000 | 6            | 3.417110000  | 2.376457000  | -2.290274000 |
| 1 | 8.167344000  | 3.397865000  | -0.673784000 | 6            | 2.960081000  | 1.003479000  | -1.910969000 |
| 1 | 6.776123000  | 3.020990000  | -6.373358000 | 6            | 2.847917000  | 0.410006000  | -0.673898000 |
| 8 | -1.865811000 | 1.321555000  | 3.502831000  | 7            | 2.701092000  | -0.013483000 | -2.819453000 |
| 6 | -2.570375000 | 0.835691000  | 2.577941000  | 6            | 2.467407000  | -1.149849000 | -2.123678000 |
| 8 | -3.388890000 | -0.127033000 | 2.672341000  | 7            | 2.547829000  | -0.925705000 | -0.820433000 |
| 6 | -2.372195000 | 1.457385000  | 1.216923000  | 1            | 5.209349000  | 3.468046000  | -2.837832000 |
| 7 | -1.888396000 | 2.848302000  | 1.309898000  | 1            | 3.309208000  | 3.039432000  | -1.426738000 |
| 6 | -2.933870000 | 3.948108000  | 1.319353000  | 1            | 2.812918000  | 2.795854000  | -3.099282000 |
| 1 | -3.153140000 | 1.334712000  | 0.469704000  | 1            | 2.992319000  | 0.846586000  | 0.302698000  |
| 1 | -1.222925000 | 0.836010000  | 0.729934000  | 1            | 2.668396000  | 0.079214000  | -3.842227000 |
| 1 | -1.349960000 | 2.858721000  | 2.192157000  | 1            | 2.204380000  | -2.094763000 | -2.574610000 |
| 1 | -2.385798000 | 4.854340000  | 1.043375000  | 7            | 5.081736000  | 1.745004000  | -4.029093000 |
| 6 | -4.513693000 | 6.258377000  | 3.638709000  | 6            | 4.512600000  | 2.174320000  | -5.177452000 |
| 6 | -4.895278000 | 5.071108000  | 2.687358000  | 8            | 3.890591000  | 3.230668000  | -5.284919000 |
| 6 | -3.638011000 | 4.103605000  | 2.666158000  | 6            | 4.687287000  | 1.229151000  | -6.381495000 |
| 6 | -3.550571000 | 5.574448000  | 4.634738000  | 7            | 3.488062000  | 1.196244000  | -7.197372000 |
| 6 | -2.695898000 | 4.616909000  | 3.789734000  | 1            | 5.547397000  | 0.844057000  | -3.957235000 |
| 6 | -3.783615000 | 7.383977000  | 2.862167000  | 1            | 4.930675000  | 0.214250000  | -6.051822000 |
| 6 | -5.488362000 | 5.535118000  | 1.369088000  | 1            | 5.512166000  | 1.588982000  | -7.003472000 |
| 6 | -5.756194000 | 6.815970000  | 4.351662000  | 1            | 3.466646000  | 1.761875000  | -8.034053000 |
| 6 | -4.529369000 | 7.847583000  | 1.603543000  | 6            | 2.309702000  | 0.741102000  | -6.694548000 |
| 6 | -4.782285000 | 6.664351000  | 0.648170000  | 8            | 2.241072000  | 0.196127000  | -5.587111000 |
|   |              |              |              | 6            | 1.088757000  | 0.943601000  | -7.574365000 |

|   |              |              |              |   |               |              |              |
|---|--------------|--------------|--------------|---|---------------|--------------|--------------|
| 6 | 0.448202000  | 2.350984000  | -7.411264000 | 6 | -9.314571000  | 2.999125000  | -3.204627000 |
| 1 | 1.365436000  | 0.805255000  | -8.626823000 | 6 | -7.921494000  | 3.133985000  | -2.632878000 |
| 1 | 0.363371000  | 0.168705000  | -7.312489000 | 6 | -7.181246000  | 4.311617000  | -2.801848000 |
| 1 | 1.218842000  | 3.116776000  | -7.560159000 | 6 | -7.336036000  | 2.099794000  | -1.889492000 |
| 1 | -0.272812000 | 2.469695000  | -8.228239000 | 6 | -5.905846000  | 4.456087000  | -2.254165000 |
| 6 | -0.257680000 | 2.593305000  | -6.091612000 | 6 | -6.066051000  | 2.228477000  | -1.324342000 |
| 6 | 0.394519000  | 3.233413000  | -5.027906000 | 6 | -5.348374000  | 3.412356000  | -1.508838000 |
| 6 | -1.598970000 | 2.217069000  | -5.928441000 | 8 | -4.081484000  | 3.499505000  | -0.961203000 |
| 6 | -0.286661000 | 3.505074000  | -3.837455000 | 1 | -9.415048000  | 3.542720000  | -4.150650000 |
| 6 | -2.281577000 | 2.485453000  | -4.741446000 | 1 | -10.070662000 | 3.402819000  | -2.517694000 |
| 6 | -1.629869000 | 3.139017000  | -3.688520000 | 1 | -7.604321000  | 5.132171000  | -3.377444000 |
| 1 | 1.432271000  | 3.537593000  | -5.142470000 | 1 | -7.887833000  | 1.175856000  | -1.731616000 |
| 1 | -2.123522000 | 1.733934000  | -6.750158000 | 1 | -5.342904000  | 5.373244000  | -2.411464000 |
| 1 | 0.223760000  | 4.038770000  | -3.038504000 | 1 | -5.644476000  | 1.429106000  | -0.721721000 |
| 1 | -3.329824000 | 2.217420000  | -4.644850000 | 1 | -3.888000000  | 4.431972000  | -0.740741000 |
| 1 | -2.186791000 | 3.397190000  | -2.789566000 | 1 | -9.572309000  | 1.950917000  | -3.389480000 |
| 7 | 3.882785000  | -3.368214000 | 0.431503000  | 6 | -9.838925000  | -3.015623000 | 3.586749000  |
| 6 | 4.956547000  | -3.386239000 | 1.199164000  | 6 | -8.638124000  | -2.369148000 | 2.933594000  |
| 7 | 5.883056000  | -4.244049000 | 0.701713000  | 6 | -7.591922000  | -1.828908000 | 3.690815000  |
| 6 | 5.377082000  | -4.815898000 | -0.455776000 | 6 | -8.537335000  | -2.276254000 | 1.536299000  |
| 6 | 4.133386000  | -4.255288000 | -0.598980000 | 6 | -6.486188000  | -1.218776000 | 3.092595000  |
| 6 | 6.131365000  | -5.813117000 | -1.272132000 | 6 | -7.444275000  | -1.671445000 | 0.920785000  |
| 1 | 6.372564000  | -6.715671000 | -0.696652000 | 6 | -6.405347000  | -1.134073000 | 1.695746000  |
| 1 | 5.529196000  | -6.119864000 | -2.131485000 | 8 | -5.358388000  | -0.540567000 | 1.055156000  |
| 1 | 3.396280000  | -4.437623000 | -1.365835000 | 1 | -9.747299000  | -3.014406000 | 4.677970000  |
| 1 | 6.786603000  | -4.436441000 | 1.111351000  | 1 | -9.965442000  | -4.057470000 | 3.265331000  |
| 1 | 5.088330000  | -2.807378000 | 2.099238000  | 1 | -7.644896000  | -1.868765000 | 4.777224000  |
| 1 | 7.072997000  | -5.400660000 | -1.655879000 | 1 | -9.333661000  | -2.682963000 | 0.915818000  |
| 8 | 1.209462000  | -4.062320000 | 1.490664000  | 1 | -5.694593000  | -0.792942000 | 3.702483000  |
| 6 | 0.843465000  | -4.366427000 | 0.308381000  | 1 | -7.382106000  | -1.606035000 | -0.161999000 |
| 8 | 1.111479000  | -3.571067000 | -0.647040000 | 1 | -4.621170000  | -0.364473000 | 1.702287000  |
| 6 | 0.087462000  | -5.650126000 | 0.067468000  | 1 | -10.768127000 | -2.488890000 | 3.334648000  |
| 1 | -0.852650000 | -5.628056000 | 0.629978000  | 6 | -4.829972000  | -1.058107000 | -2.615392000 |
| 1 | -0.123632000 | -5.785566000 | -0.994893000 | 6 | -3.418667000  | -0.461798000 | -2.593436000 |
| 1 | 0.672414000  | -6.497049000 | 0.441452000  | 6 | -2.540240000  | -1.113446000 | -1.515275000 |
| 7 | -0.712438000 | -2.326140000 | 4.271390000  | 6 | -1.044850000  | -0.849250000 | -1.627221000 |
| 6 | -1.658924000 | -3.253205000 | 4.119782000  | 7 | -0.675190000  | 0.615913000  | -1.469055000 |
| 7 | -2.907335000 | -2.872974000 | 3.814883000  | 1 | -5.287527000  | -0.997041000 | -1.622670000 |
| 7 | -1.383849000 | -4.554767000 | 4.340404000  | 1 | -4.800517000  | -2.114922000 | -2.909128000 |
| 6 | -0.036341000 | -5.053548000 | 4.633838000  | 1 | -3.491742000  | 0.620303000  | -2.415132000 |
| 6 | -0.087084000 | -6.532734000 | 5.004405000  | 1 | -2.947676000  | -0.585971000 | -3.579884000 |
| 1 | -0.714004000 | -6.701318000 | 5.886836000  | 1 | -2.904083000  | -0.842315000 | -0.516166000 |
| 1 | 0.921141000  | -6.893283000 | 5.229200000  | 1 | -2.642032000  | -2.205415000 | -1.580203000 |
| 1 | 0.371064000  | -4.474317000 | 5.470851000  | 1 | -0.659976000  | -1.147548000 | -2.607443000 |
| 1 | 0.615761000  | -4.895876000 | 3.765638000  | 1 | -0.489506000  | -1.356737000 | -0.836825000 |
| 1 | -2.101633000 | -5.231280000 | 4.107156000  | 1 | -1.110078000  | 1.211311000  | -2.187519000 |
| 1 | -0.920241000 | -1.370422000 | 3.939023000  | 1 | 0.342838000   | 0.727472000  | -1.553253000 |
| 1 | 0.276159000  | -2.565145000 | 4.236607000  | 1 | -0.919188000  | 1.008168000  | -0.520842000 |
| 1 | -3.642145000 | -3.557520000 | 3.692629000  | 1 | -5.475019000  | -0.527753000 | -3.323384000 |
| 1 | -3.082165000 | -1.904427000 | 3.499166000  | 6 | -5.307779000  | 6.691313000  | 5.001608000  |
| 1 | -0.480697000 | -7.137522000 | 4.178796000  | 6 | -5.411904000  | 5.468091000  | 4.118712000  |
| 8 | 0.432012000  | -1.244965000 | 1.048536000  | 6 | -4.799279000  | 4.260282000  | 4.483803000  |
| 6 | -5.214006000 | -6.387934000 | 6.141161000  | 6 | -6.157911000  | 5.500259000  | 2.930223000  |
| 6 | -4.931028000 | -6.199283000 | 4.668905000  | 6 | -4.934163000  | 3.114895000  | 3.693854000  |
| 6 | -3.997880000 | -7.007317000 | 4.001357000  | 6 | -6.294520000  | 4.359641000  | 2.135787000  |
| 6 | -5.621212000 | -5.230880000 | 3.921896000  | 6 | -5.683707000  | 3.161744000  | 2.515903000  |
| 6 | -3.766651000 | -6.859382000 | 2.628477000  | 1 | -5.345922000  | 7.616042000  | 4.415430000  |
| 6 | -5.396600000 | -5.079394000 | 2.550132000  | 1 | -4.377315000  | 6.693579000  | 5.580111000  |
| 6 | -4.465708000 | -5.894831000 | 1.898601000  | 1 | -4.220204000  | 4.213728000  | 5.404045000  |
| 1 | -5.425638000 | -5.433847000 | 6.635442000  | 1 | -6.650663000  | 6.425111000  | 2.635875000  |
| 1 | -4.371293000 | -6.859294000 | 6.657251000  | 1 | -4.456312000  | 2.185271000  | 3.992432000  |
| 1 | -3.461722000 | -7.773071000 | 4.558049000  | 1 | -6.881360000  | 4.401475000  | 1.221971000  |
| 1 | -6.349061000 | -4.589801000 | 4.412998000  | 1 | -5.793306000  | 2.273362000  | 1.900770000  |
| 1 | -3.051565000 | -7.509277000 | 2.129860000  | 1 | -6.135469000  | 6.731891000  | 5.722211000  |
| 1 | -5.950256000 | -4.325341000 | 1.997449000  | 6 | 4.185967000   | 6.638715000  | -3.900694000 |
| 1 | -4.294704000 | -5.783948000 | 0.831403000  | 6 | 4.774621000   | 6.326730000  | -2.544107000 |
| 1 | -6.090309000 | -7.031864000 | 6.291613000  | 6 | 3.949123000   | 6.046018000  | -1.444041000 |

|                         |              |              |              |   |              |              |              |
|-------------------------|--------------|--------------|--------------|---|--------------|--------------|--------------|
| 6                       | 6.164346000  | 6.275189000  | -2.354813000 | 1 | 5.252160000  | -0.785037000 | 1.959191000  |
| 6                       | 4.491429000  | 5.711356000  | -0.200186000 | 1 | 5.630352000  | 0.968127000  | 4.288950000  |
| 6                       | 6.712689000  | 5.947393000  | -1.112656000 | 1 | 7.052545000  | -1.064418000 | 0.536245000  |
| 6                       | 5.879263000  | 5.660531000  | -0.027201000 | 1 | 7.477668000  | 1.766964000  | -0.259091000 |
| 1                       | 3.213860000  | 7.135375000  | -3.810401000 | 1 | 8.536334000  | -0.196161000 | 0.988976000  |
| 1                       | 4.845391000  | 7.292255000  | -4.481431000 | 6 | 6.740269000  | 0.337156000  | -1.538113000 |
| 1                       | 2.868612000  | 6.098574000  | -1.565305000 | 8 | 6.529075000  | -0.855121000 | -1.790891000 |
| 1                       | 6.823202000  | 6.502495000  | -3.189865000 | 6 | 6.321138000  | 1.425969000  | -2.538930000 |
| 1                       | 3.839299000  | 5.499273000  | 0.643361000  | 6 | 5.008420000  | 2.128017000  | -2.052741000 |
| 1                       | 7.792418000  | 5.922824000  | -0.990345000 | 6 | 3.917539000  | 1.168737000  | -1.697091000 |
| 1                       | 6.292196000  | 5.391368000  | 0.940046000  | 6 | 3.542971000  | 0.654136000  | -0.478699000 |
| 1                       | 4.036195000  | 5.718417000  | -4.480609000 | 7 | 3.133663000  | 0.504855000  | -2.626339000 |
| 8                       | -1.073675000 | 0.097483000  | 2.925276000  | 6 | 2.341646000  | -0.369309000 | -1.969287000 |
| 6                       | -2.236024000 | 0.353375000  | 2.452062000  | 7 | 2.572071000  | -0.305842000 | -0.663973000 |
| 8                       | -3.304776000 | -0.272276000 | 2.764385000  | 1 | 7.095165000  | 2.194881000  | -2.633844000 |
| 6                       | -2.327007000 | 1.446191000  | 1.491392000  | 1 | 5.246849000  | 2.741921000  | -1.179146000 |
| 7                       | -1.144140000 | 2.036614000  | 1.060064000  | 1 | 4.698287000  | 2.811775000  | -2.848887000 |
| 6                       | -1.139835000 | 3.485223000  | 0.762860000  | 1 | 3.914388000  | 0.893627000  | 0.505426000  |
| 1                       | -3.258689000 | 1.796261000  | 1.065017000  | 1 | 3.141570000  | 0.644161000  | -3.642722000 |
| 1                       | 0.015533000  | -0.799706000 | 1.824549000  | 1 | 1.627154000  | -1.027099000 | -2.439289000 |
| 1                       | -0.392803000 | 1.734626000  | 1.685020000  | 7 | 6.128748000  | 0.762132000  | -3.813814000 |
| 1                       | -0.156983000 | 3.722346000  | 0.338412000  | 6 | 5.933007000  | 1.426893000  | -4.975477000 |
| 6                       | -0.680830000 | 6.705895000  | 2.461431000  | 8 | 5.980968000  | 2.650454000  | -5.080983000 |
| 6                       | -1.807259000 | 5.865193000  | 1.765339000  | 6 | 5.649206000  | 0.526587000  | -6.191971000 |
| 6                       | -1.433821000 | 4.345468000  | 2.002411000  | 7 | 4.597543000  | 1.069722000  | -7.029697000 |
| 6                       | -0.252485000 | 5.772469000  | 3.617402000  | 1 | 6.046703000  | -0.247502000 | -3.750310000 |
| 6                       | -0.264507000 | 4.354818000  | 3.023790000  | 1 | 5.374990000  | -0.485082000 | -5.875437000 |
| 6                       | 0.508500000  | 6.956156000  | 1.498269000  | 1 | 6.560004000  | 0.458258000  | -6.794120000 |
| 6                       | -2.109039000 | 6.317270000  | 0.348732000  | 1 | 4.857414000  | 1.534512000  | -7.887637000 |
| 6                       | -1.225283000 | 8.042257000  | 2.990735000  | 6 | 3.322517000  | 1.195272000  | -6.571632000 |
| 6                       | 0.086706000  | 7.526403000  | 0.137742000  | 8 | 2.994882000  | 0.773716000  | -5.458194000 |
| 6                       | -0.926090000 | 6.593820000  | -0.554984000 | 6 | 2.336929000  | 1.858270000  | -7.521729000 |
| 6                       | -3.368596000 | 6.561085000  | -0.052686000 | 6 | 2.508200000  | 3.398594000  | -7.632812000 |
| 1                       | -2.722137000 | 6.026293000  | 2.346793000  | 1 | 2.448751000  | 1.416829000  | -8.520530000 |
| 1                       | 0.687479000  | 4.151247000  | 2.512785000  | 1 | 1.334343000  | 1.619897000  | -7.158177000 |
| 1                       | -0.378002000 | 3.581299000  | 3.790767000  | 1 | 3.535952000  | 3.630609000  | -7.939165000 |
| 1                       | -2.049034000 | 7.874441000  | 3.694590000  | 1 | 1.859512000  | 3.736509000  | -8.449313000 |
| 1                       | -1.607210000 | 8.682826000  | 2.188218000  | 6 | 2.166837000  | 4.158892000  | -6.367480000 |
| 1                       | -0.442746000 | 8.600729000  | 3.518785000  | 6 | 3.149814000  | 4.447648000  | -5.410823000 |
| 1                       | 0.967700000  | 7.659134000  | -0.502550000 | 6 | 0.853421000  | 4.589195000  | -6.133415000 |
| 1                       | -0.361393000 | 8.519760000  | 0.260126000  | 6 | 2.822274000  | 5.147011000  | -4.246862000 |
| 1                       | -0.410374000 | 5.653037000  | -0.801836000 | 6 | 0.524154000  | 5.285898000  | -4.969163000 |
| 1                       | -1.267097000 | 7.024884000  | -1.503196000 | 6 | 1.509895000  | 5.566502000  | -4.020639000 |
| 1                       | -3.579634000 | 6.962087000  | -1.042701000 | 1 | 4.175062000  | 4.125462000  | -5.572759000 |
| 1                       | -2.313526000 | 3.888290000  | 2.468696000  | 1 | 0.083893000  | 4.391487000  | -6.877220000 |
| 1                       | -4.216388000 | 6.433141000  | 0.617977000  | 1 | 3.600064000  | 5.375540000  | -3.522395000 |
| 1                       | 0.719986000  | 6.049860000  | 4.041535000  | 1 | -0.497805000 | 5.621113000  | -4.811467000 |
| 1                       | 1.050284000  | 6.015158000  | 1.324352000  | 1 | 1.260118000  | 6.120596000  | -3.119380000 |
| 1                       | 1.223507000  | 7.631870000  | 1.985088000  | 7 | 3.141128000  | -3.066333000 | 0.197369000  |
| 1                       | -0.990075000 | 5.841676000  | 4.427744000  | 6 | 3.092425000  | -4.336792000 | 0.562792000  |
| 1                       | -1.889935000 | 3.650261000  | -0.013869000 | 7 | 4.214865000  | -4.980033000 | 0.158769000  |
|                         |              |              |              | 6 | 5.034747000  | -4.074708000 | -0.499335000 |
|                         |              |              |              | 6 | 4.345114000  | -2.890600000 | -0.460641000 |
|                         |              |              |              | 6 | 6.360778000  | -4.425441000 | -1.089115000 |
|                         |              |              |              | 1 | 6.266512000  | -5.144371000 | -1.912870000 |
|                         |              |              |              | 1 | 6.826832000  | -3.517385000 | -1.480255000 |
|                         |              |              |              | 1 | 4.651486000  | -1.941944000 | -0.870370000 |
|                         |              |              |              | 1 | 4.414368000  | -5.959046000 | 0.310368000  |
|                         |              |              |              | 1 | 2.282428000  | -4.795368000 | 1.107264000  |
|                         |              |              |              | 1 | 7.036755000  | -4.861673000 | -0.342913000 |
|                         |              |              |              | 8 | 0.505191000  | -3.205072000 | 1.246616000  |
|                         |              |              |              | 6 | -0.043703000 | -3.162631000 | 0.088978000  |
|                         |              |              |              | 8 | 0.399123000  | -2.343928000 | -0.765591000 |
|                         |              |              |              | 6 | -1.224899000 | -4.048141000 | -0.213772000 |
|                         |              |              |              | 1 | -2.143278000 | -3.508961000 | 0.053398000  |
|                         |              |              |              | 1 | -1.261575000 | -4.282458000 | -1.280412000 |
|                         |              |              |              | 1 | -1.180932000 | -4.966203000 | 0.377421000  |
| <b><sup>5</sup>Re2:</b> |              |              |              |   |              |              |              |
| 26                      | 1.772137000  | -1.581697000 | 0.818852000  |   |              |              |              |
| 8                       | 3.140800000  | -1.213567000 | 2.192812000  |   |              |              |              |
| 6                       | 2.914423000  | -1.121649000 | 3.475853000  |   |              |              |              |
| 8                       | 1.895002000  | -1.500371000 | 4.052283000  |   |              |              |              |
| 6                       | 4.075838000  | -0.541881000 | 4.293688000  |   |              |              |              |
| 6                       | 4.927146000  | 0.514511000  | 3.586090000  |   |              |              |              |
| 7                       | 5.711964000  | -0.057814000 | 2.495378000  |   |              |              |              |
| 6                       | 6.813359000  | 0.566751000  | 2.009307000  |   |              |              |              |
| 8                       | 7.279515000  | 1.601164000  | 2.481491000  |   |              |              |              |
| 6                       | 7.466104000  | -0.085211000 | 0.781364000  |   |              |              |              |
| 7                       | 7.257393000  | 0.780884000  | -0.374416000 |   |              |              |              |
| 1                       | 4.714575000  | -1.379325000 | 4.607585000  |   |              |              |              |
| 1                       | 3.645031000  | -0.116784000 | 5.204690000  |   |              |              |              |
| 1                       | 4.285557000  | 1.324870000  | 3.211133000  |   |              |              |              |

|   |               |              |              |   |              |              |              |
|---|---------------|--------------|--------------|---|--------------|--------------|--------------|
| 7 | -0.978780000  | -1.590524000 | 3.939683000  | 6 | -1.949250000 | 0.135289000  | -1.224259000 |
| 6 | -1.772431000  | -2.615937000 | 4.223308000  | 7 | -1.465325000 | 1.144857000  | -0.245692000 |
| 7 | -3.110471000  | -2.458219000 | 4.178029000  | 1 | -2.950349000 | 2.725733000  | -4.479897000 |
| 7 | -1.273971000  | -3.801297000 | 4.628732000  | 1 | -2.441220000 | 1.233793000  | -5.281129000 |
| 6 | 0.155078000   | -4.120394000 | 4.688945000  | 1 | -1.114690000 | 2.415396000  | -2.771084000 |
| 6 | 0.364941000   | -5.449322000 | 5.408887000  | 1 | -0.635392000 | 0.914149000  | -3.547751000 |
| 1 | -0.021262000  | -5.410988000 | 6.433060000  | 1 | -3.362200000 | 1.432608000  | -2.230930000 |
| 1 | 1.433390000   | -5.681267000 | 5.457283000  | 1 | -2.946496000 | -0.031011000 | -3.104926000 |
| 1 | 0.671376000   | -3.317582000 | 5.222346000  | 1 | -1.146483000 | -0.566063000 | -1.483660000 |
| 1 | 0.570449000   | -4.151756000 | 3.674527000  | 1 | -2.731277000 | -0.450932000 | -0.728917000 |
| 1 | -1.926505000  | -4.575453000 | 4.674976000  | 1 | -0.732033000 | 1.709602000  | -0.674730000 |
| 1 | -1.394475000  | -0.708529000 | 3.618991000  | 1 | -0.999346000 | 0.660296000  | 0.527736000  |
| 1 | 0.036169000   | -1.682513000 | 3.858446000  | 1 | -2.692905000 | 2.015373000  | 0.452586000  |
| 1 | -3.707145000  | -3.270903000 | 4.269055000  | 1 | -1.347710000 | 2.630017000  | -5.229094000 |
| 1 | -3.501158000  | -1.661926000 | 3.659668000  | 6 | -2.207387000 | 3.508571000  | 5.267808000  |
| 1 | -0.131821000  | -6.274348000 | 4.883648000  | 6 | -3.703499000 | 3.442536000  | 5.069887000  |
| 8 | 0.706185000   | -0.478563000 | 1.347592000  | 6 | -4.409276000 | 2.266229000  | 5.372409000  |
| 6 | -6.400259000  | -4.484449000 | 6.303380000  | 6 | -4.426616000 | 4.533471000  | 4.566807000  |
| 6 | -5.442507000  | -5.136995000 | 5.333322000  | 6 | -5.787158000 | 2.180338000  | 5.170041000  |
| 6 | -4.420936000  | -5.983276000 | 5.791439000  | 6 | -5.807868000 | 4.451494000  | 4.361182000  |
| 6 | -5.570255000  | -4.941820000 | 3.948385000  | 6 | -6.495299000 | 3.272672000  | 4.658019000  |
| 6 | -3.564041000  | -6.627406000 | 4.894552000  | 1 | -1.818736000 | 4.511375000  | 5.062307000  |
| 6 | -4.710321000  | -5.576425000 | 3.046179000  | 1 | -1.703529000 | 2.798295000  | 4.601014000  |
| 6 | -3.704699000  | -6.424584000 | 3.516799000  | 1 | -3.868080000 | 1.409206000  | 5.766361000  |
| 1 | -6.831980000  | -3.568314000 | 5.887729000  | 1 | -3.902954000 | 5.462095000  | 4.348020000  |
| 1 | -5.907253000  | -4.231519000 | 7.247994000  | 1 | -6.310717000 | 1.258703000  | 5.409552000  |
| 1 | -4.304321000  | -6.149269000 | 6.859927000  | 1 | -6.349685000 | 5.311826000  | 3.976257000  |
| 1 | -6.351950000  | -4.289704000 | 3.565638000  | 1 | -7.567175000 | 3.208028000  | 4.497885000  |
| 1 | -2.795794000  | -7.297873000 | 5.272274000  | 1 | -1.929180000 | 3.246075000  | 6.295464000  |
| 1 | -4.834473000  | -5.404610000 | 1.980718000  | 6 | 7.914809000  | 5.463832000  | -3.762585000 |
| 1 | -3.044783000  | -6.932165000 | 2.818260000  | 6 | 8.090632000  | 4.979206000  | -2.342226000 |
| 1 | -7.233470000  | -5.158209000 | 6.542167000  | 6 | 7.138508000  | 5.274314000  | -1.353861000 |
| 6 | -11.553788000 | 2.025368000  | 4.303690000  | 6 | 9.193571000  | 4.191047000  | -1.979991000 |
| 6 | -10.481308000 | 2.434344000  | 3.320021000  | 6 | 7.271652000  | 4.783936000  | -0.052921000 |
| 6 | -10.224079000 | 3.782408000  | 3.042836000  | 6 | 9.334696000  | 3.701513000  | -0.678618000 |
| 6 | -9.728703000  | 1.474294000  | 2.625845000  | 6 | 8.370898000  | 3.989912000  | 0.293752000  |
| 6 | -9.257963000  | 4.165103000  | 2.109520000  | 1 | 7.359545000  | 6.407311000  | -3.797601000 |
| 6 | -8.761194000  | 1.835853000  | 1.691547000  | 1 | 8.880813000  | 5.622091000  | -4.253737000 |
| 6 | -8.521350000  | 3.189309000  | 1.432440000  | 1 | 6.286808000  | 5.901982000  | -1.608202000 |
| 8 | -7.552503000  | 3.499586000  | 0.510815000  | 1 | 9.954023000  | 3.965927000  | -2.724548000 |
| 1 | -11.752488000 | 2.817641000  | 5.033059000  | 1 | 6.525908000  | 5.030878000  | 0.698510000  |
| 1 | -11.269427000 | 1.123512000  | 4.857314000  | 1 | 10.204186000 | 3.102147000  | -0.420108000 |
| 1 | -10.789592000 | 4.553061000  | 3.561614000  | 1 | 8.466658000  | 3.597898000  | 1.301929000  |
| 1 | -9.906091000  | 0.418336000  | 2.818627000  | 1 | 7.356966000  | 4.727073000  | -4.355192000 |
| 1 | -9.079955000  | 5.219929000  | 1.910338000  | 8 | -2.247186000 | 0.828545000  | 2.960231000  |
| 1 | -8.188294000  | 1.083288000  | 1.157532000  | 6 | -3.421830000 | 0.703698000  | 2.578424000  |
| 1 | -7.464843000  | 4.467705000  | 0.430215000  | 8 | -4.188745000 | -0.303588000 | 2.619248000  |
| 1 | -12.502295000 | 1.806254000  | 3.795302000  | 6 | -4.091729000 | 1.909000000  | 1.938447000  |
| 6 | -9.494343000  | -4.250468000 | -0.193723000 | 7 | -3.602654000 | 2.450419000  | 0.883176000  |
| 6 | -8.106780000  | -3.694402000 | 0.031999000  | 6 | -4.225531000 | 3.581702000  | 0.173033000  |
| 6 | -7.868235000  | -2.680518000 | 0.967259000  | 1 | -5.031015000 | 2.277051000  | 2.351912000  |
| 6 | -7.009678000  | -4.163443000 | -0.706394000 | 1 | -4.104438000 | 3.373088000  | -0.894321000 |
| 6 | -6.592860000  | -2.144948000 | 1.165568000  | 6 | -3.156826000 | 6.892367000  | -0.938888000 |
| 6 | -5.729555000  | -3.644939000 | -0.524190000 | 6 | -4.223599000 | 6.230402000  | 0.001978000  |
| 6 | -5.512385000  | -2.629695000 | 0.416468000  | 6 | -3.552798000 | 4.907936000  | 0.564618000  |
| 8 | -4.240418000  | -2.154069000 | 0.570376000  | 6 | -1.830479000 | 6.444818000  | -0.284635000 |
| 1 | -10.172161000 | -3.976017000 | 0.621364000  | 6 | -2.059246000 | 4.987113000  | 0.144533000  |
| 1 | -9.484399000  | -5.344425000 | -0.265328000 | 6 | -3.266446000 | 6.336544000  | -2.382444000 |
| 1 | -8.698023000  | -2.294682000 | 1.556337000  | 6 | -5.602507000 | 6.153093000  | -0.631490000 |
| 1 | -7.159495000  | -4.952152000 | -1.440851000 | 6 | -3.295838000 | 8.423189000  | -0.944280000 |
| 1 | -6.427512000  | -1.355082000 | 1.893299000  | 6 | -4.685645000 | 6.406334000  | -2.962010000 |
| 1 | -4.889538000  | -4.012907000 | -1.106525000 | 6 | -5.686252000 | 5.657529000  | -2.060398000 |
| 1 | -4.226581000  | -1.148048000 | 1.288834000  | 6 | -6.685444000 | 6.625075000  | 0.008458000  |
| 1 | -9.934828000  | -3.871932000 | -1.125791000 | 1 | -4.318240000 | 6.890088000  | 0.872358000  |
| 6 | -2.091859000  | 2.065372000  | -4.657369000 | 1 | -1.869177000 | 4.310980000  | -0.699038000 |
| 6 | -1.502677000  | 1.556234000  | -3.337744000 | 1 | -1.387074000 | 4.676157000  | 0.950949000  |
| 6 | -2.519764000  | 0.774738000  | -2.492538000 | 1 | -3.181583000 | 8.827769000  | 0.068553000  |

|   |              |             |              |   |              |              |              |
|---|--------------|-------------|--------------|---|--------------|--------------|--------------|
| 1 | -4.272103000 | 8.748532000 | -1.318972000 | 6 | 2.772423000  | 3.640617000  | -7.635551000 |
| 1 | -2.525932000 | 8.882888000 | -1.575533000 | 6 | 3.279156000  | 4.123694000  | -6.421085000 |
| 1 | -4.701510000 | 5.971550000 | -3.968593000 | 6 | 1.416363000  | 3.843485000  | -7.926824000 |
| 1 | -5.003564000 | 7.450427000 | -3.068272000 | 6 | 2.445573000  | 4.789893000  | -5.519820000 |
| 1 | -5.460110000 | 4.582831000 | -2.106609000 | 6 | 0.581478000  | 4.507682000  | -7.026396000 |
| 1 | -6.708139000 | 5.773734000 | -2.437665000 | 6 | 1.094866000  | 4.982665000  | -5.817398000 |
| 1 | -7.660710000 | 6.662560000 | -0.474359000 | 1 | 4.330325000  | 3.981507000  | -6.181775000 |
| 1 | -3.625952000 | 4.960426000 | 1.657215000  | 1 | 1.013605000  | 3.493672000  | -8.875432000 |
| 1 | -6.622753000 | 7.044811000 | 1.010275000  | 1 | 2.857323000  | 5.174598000  | -4.590004000 |
| 1 | -0.971524000 | 6.559327000 | -0.956994000 | 1 | -0.463064000 | 4.671992000  | -7.278756000 |
| 1 | -2.934833000 | 5.289022000 | -2.405669000 | 1 | 0.451377000  | 5.514018000  | -5.121132000 |
| 1 | -2.569385000 | 6.890030000 | -3.025773000 | 7 | 1.920278000  | -2.221323000 | -0.098836000 |
| 1 | -1.633094000 | 7.068269000 | 0.597474000  | 6 | 1.773262000  | -3.370833000 | 0.537264000  |
| 1 | -5.292356000 | 3.580058000 | 0.406817000  | 7 | 2.976793000  | -3.974979000 | 0.702041000  |

**5TS5:**

|    |             |              |              |   |               |              |              |
|----|-------------|--------------|--------------|---|---------------|--------------|--------------|
| 26 | 0.325188000 | -0.686748000 | -0.316812000 | 6 | 3.275521000   | -2.082295000 | -0.343127000 |
| 8  | 1.249591000 | 0.144043000  | 1.270723000  | 6 | 5.409995000   | -3.514804000 | 0.124935000  |
| 6  | 1.022745000 | -0.195477000 | 2.495956000  | 1 | 5.607516000   | -4.419244000 | -0.464451000 |
| 8  | 0.243249000 | -1.086698000 | 2.866255000  | 1 | 5.968287000   | -2.688920000 | -0.323646000 |
| 6  | 1.809909000 | 0.587264000  | 3.557144000  | 1 | 3.687032000   | -1.227754000 | -0.857160000 |
| 6  | 2.743971000 | 1.673794000  | 3.028374000  | 1 | 3.127859000   | -4.866584000 | 1.153160000  |
| 7  | 3.841704000 | 1.108132000  | 2.250443000  | 1 | 0.835002000   | -3.773514000 | 0.884752000  |
| 6  | 5.056685000 | 1.711865000  | 2.175046000  | 1 | 5.804307000   | -3.684966000 | 1.134881000  |
| 8  | 5.353366000 | 2.734205000  | 2.787074000  | 8 | -0.903433000  | -2.397474000 | -0.098179000 |
| 6  | 6.071917000 | 1.037218000  | 1.239626000  | 6 | -1.030397000  | -2.617157000 | -1.348085000 |
| 7  | 6.089793000 | 1.720699000  | -0.049262000 | 8 | -0.412174000  | -1.867833000 | -2.171992000 |
| 1  | 2.368014000 | -0.139232000 | 4.160563000  | 6 | -1.944072000  | -3.709202000 | -1.833355000 |
| 1  | 1.072722000 | 1.040231000  | 4.231006000  | 1 | -2.007178000  | -4.522977000 | -1.108835000 |
| 1  | 2.176070000 | 2.392088000  | 2.422412000  | 1 | -2.950947000  | -3.286986000 | -1.936737000 |
| 1  | 3.600550000 | 0.376544000  | 1.592892000  | 1 | -1.615849000  | -4.082991000 | -2.806170000 |
| 1  | 3.195953000 | 2.228263000  | 3.854139000  | 7 | -2.301091000  | -2.429664000 | 2.608243000  |
| 1  | 5.843970000 | -0.011952000 | 1.046254000  | 6 | -3.075542000  | -2.009414000 | 3.617097000  |
| 1  | 6.275146000 | 2.720477000  | -0.044434000 | 7 | -4.343962000  | -1.642908000 | 3.390881000  |
| 1  | 7.054100000 | 1.106677000  | 1.718117000  | 7 | -2.596585000  | -1.979073000 | 4.872062000  |
| 6  | 5.915327000 | 1.077443000  | -1.222195000 | 6 | -1.331703000  | -2.584534000 | 5.303933000  |
| 8  | 5.788416000 | -0.147734000 | -1.329094000 | 6 | -1.378447000  | -2.903972000 | 6.795797000  |
| 6  | 5.802100000 | 1.978959000  | -2.461603000 | 1 | -1.525956000  | -1.996687000 | 7.392354000  |
| 6  | 4.388540000 | 2.644783000  | -2.527537000 | 1 | -0.431581000  | -3.357343000 | 7.106540000  |
| 6  | 3.257564000 | 1.674592000  | -2.411317000 | 1 | -0.496752000  | -1.917532000 | 5.064284000  |
| 6  | 2.454260000 | 1.365407000  | -1.340541000 | 1 | -1.193483000  | -3.497791000 | 4.716131000  |
| 7  | 2.875849000 | 0.800395000  | -3.416082000 | 1 | -3.068051000  | -1.365718000 | 5.529196000  |
| 6  | 1.894058000 | 0.006600000  | -2.937234000 | 1 | -2.738884000  | -2.688232000 | 1.728308000  |
| 7  | 1.615336000 | 0.324372000  | -1.678541000 | 1 | -1.319607000  | -2.145973000 | 2.582262000  |
| 1  | 6.544321000 | 2.783578000  | -2.429046000 | 1 | -5.028279000  | -1.640973000 | 4.137409000  |
| 1  | 4.313907000 | 3.378281000  | -1.719056000 | 1 | -4.636599000  | -1.389092000 | 2.444716000  |
| 1  | 4.343465000 | 3.199496000  | -3.469459000 | 1 | -2.187306000  | -3.605648000 | 7.025479000  |
| 1  | 2.433642000 | 1.800206000  | -0.353520000 | 8 | -0.975650000  | 0.418746000  | -0.408570000 |
| 1  | 3.251544000 | 0.761748000  | -4.369990000 | 6 | -8.513790000  | 0.325544000  | 7.087704000  |
| 1  | 1.419807000 | -0.784853000 | -3.496553000 | 6 | -7.822107000  | -0.971439000 | 6.734346000  |
| 7  | 6.051621000 | 1.129368000  | -3.610466000 | 6 | -7.271209000  | -1.791751000 | 7.729294000  |
| 6  | 6.214452000 | 1.604565000  | -4.866804000 | 6 | -7.748889000  | -1.405860000 | 5.401702000  |
| 8  | 6.224860000 | 2.799798000  | -5.153150000 | 6 | -6.666665000  | -3.010202000 | 7.409416000  |
| 6  | 6.398900000 | 0.517715000  | -5.941751000 | 6 | -7.158032000  | -2.630888000 | 5.077787000  |
| 7  | 5.671622000 | 0.835899000  | -7.154618000 | 6 | -6.608716000  | -3.436204000 | 6.081502000  |
| 1  | 6.004430000 | 0.134473000  | -3.414301000 | 1 | -8.391364000  | 1.075125000  | 6.299139000  |
| 1  | 6.074224000 | -0.459661000 | -5.570194000 | 1 | -8.129757000  | 0.744783000  | 8.024035000  |
| 1  | 7.461844000 | 0.449404000  | -6.191136000 | 1 | -7.324635000  | -1.476105000 | 8.769248000  |
| 1  | 6.185439000 | 1.209731000  | -7.939555000 | 1 | -8.169323000  | -0.784402000 | 4.614536000  |
| 6  | 4.314268000 | 0.908451000  | -7.164724000 | 1 | -6.249558000  | -3.629066000 | 8.199603000  |
| 8  | 3.646664000 | 0.610450000  | -6.166646000 | 1 | -7.140861000  | -2.966015000 | 4.043121000  |
| 6  | 3.685991000 | 1.372647000  | -8.467524000 | 1 | -6.153987000  | -4.390424000 | 5.829618000  |
| 6  | 3.669114000 | 2.920169000  | -8.621285000 | 1 | -9.592546000  | 0.169857000  | 7.221932000  |
| 1  | 4.234571000 | 0.940012000  | -9.313519000 | 6 | -11.046337000 | 1.684454000  | 2.740916000  |
| 1  | 2.664723000 | 0.985172000  | -8.495075000 | 6 | -9.572910000  | 1.929564000  | 2.974054000  |
| 1  | 4.694114000 | 3.301450000  | -8.536962000 | 6 | -9.130153000  | 2.951555000  | 3.821395000  |
| 1  | 3.339043000 | 3.136591000  | -9.643911000 | 6 | -8.598069000  | 1.156170000  | 2.323095000  |
|    |             |              |              | 6 | -7.768620000  | 3.198884000  | 4.017242000  |

|   |               |              |              |              |              |              |              |
|---|---------------|--------------|--------------|--------------|--------------|--------------|--------------|
| 6 | -7.235350000  | 1.388557000  | 2.501061000  | 1            | 8.562094000  | 6.084915000  | -3.805604000 |
| 6 | -6.820987000  | 2.416404000  | 3.354390000  | 1            | 5.263300000  | 6.512892000  | -2.145815000 |
| 8 | -5.464805000  | 2.606793000  | 3.512443000  | 1            | 9.163680000  | 4.752358000  | -1.785923000 |
| 1 | -11.657067000 | 2.142104000  | 3.525965000  | 1            | 4.802488000  | 5.987074000  | 0.229250000  |
| 1 | -11.277952000 | 0.613543000  | 2.717173000  | 1            | 8.714056000  | 4.233707000  | 0.590967000  |
| 1 | -9.858094000  | 3.570111000  | 4.341198000  | 1            | 6.511172000  | 4.808835000  | 1.607402000  |
| 1 | -8.910549000  | 0.360014000  | 1.650721000  | 1            | 7.170554000  | 5.077964000  | -4.230631000 |
| 1 | -7.448798000  | 3.995950000  | 4.685949000  | 8            | -4.127838000 | -0.844787000 | -1.477781000 |
| 1 | -6.492504000  | 0.799307000  | 1.971521000  | 6            | -4.309865000 | -0.429268000 | -0.307848000 |
| 1 | -5.296992000  | 3.471629000  | 3.924423000  | 8            | -4.915525000 | -1.011522000 | 0.624414000  |
| 1 | -11.376628000 | 2.106377000  | 1.782370000  | 6            | -3.686381000 | 0.945478000  | 0.022395000  |
| 6 | -6.479204000  | -7.876058000 | -2.437977000 | 7            | -4.394165000 | 1.950953000  | 0.222256000  |
| 6 | -5.915149000  | -6.737320000 | -1.618876000 | 6            | -4.078565000 | 3.320958000  | 0.574614000  |
| 6 | -6.215102000  | -5.403392000 | -1.920589000 | 1            | -2.539727000 | 0.907653000  | 0.012101000  |
| 6 | -5.088001000  | -6.981158000 | -0.512273000 | 1            | -4.483319000 | 3.948104000  | -0.229910000 |
| 6 | -5.720855000  | -4.347253000 | -1.153041000 | 6            | -1.506765000 | 5.916981000  | 0.741384000  |
| 6 | -4.587917000  | -5.941844000 | 0.269118000  | 6            | -2.328948000 | 4.969938000  | 1.680703000  |
| 6 | -4.906029000  | -4.615500000 | -0.046856000 | 6            | -2.597331000 | 3.644061000  | 0.844789000  |
| 8 | -4.390948000  | -3.622321000 | 0.737020000  | 6            | -0.738120000 | 4.911243000  | -0.144635000 |
| 1 | -7.344648000  | -8.339102000 | -1.944899000 | 6            | -1.731416000 | 3.775458000  | -0.436090000 |
| 1 | -5.737403000  | -8.668193000 | -2.593272000 | 6            | -2.442475000 | 6.793119000  | -0.131651000 |
| 1 | -6.848263000  | -5.179743000 | -2.776622000 | 6            | -3.509484000 | 5.657022000  | 2.346426000  |
| 1 | -4.832877000  | -8.006741000 | -0.252863000 | 6            | -0.546480000 | 6.806025000  | 1.547868000  |
| 1 | -5.949619000  | -3.316940000 | -1.414014000 | 6            | -3.514016000 | 7.538794000  | 0.674056000  |
| 1 | -3.955775000  | -6.140400000 | 1.130058000  | 6            | -4.374741000 | 6.546286000  | 1.478108000  |
| 1 | -4.764603000  | -2.740870000 | 0.486393000  | 6            | -3.719603000 | 5.554947000  | 3.667924000  |
| 1 | -6.812819000  | -7.532961000 | -3.423097000 | 1            | -1.651569000 | 4.666117000  | 2.488088000  |
| 6 | 0.080306000   | 0.038303000  | -6.942860000 | 1            | -2.368027000 | 4.036884000  | -1.292935000 |
| 6 | -1.002519000  | -0.109906000 | -5.868502000 | 1            | -1.224120000 | 2.837066000  | -0.678290000 |
| 6 | -1.232634000  | 1.185057000  | -5.072221000 | 1            | 0.141523000  | 6.194802000  | 2.144672000  |
| 6 | -2.396490000  | 1.104309000  | -4.083826000 | 1            | -1.077253000 | 7.469243000  | 2.239129000  |
| 7 | -2.123892000  | 0.182603000  | -2.940167000 | 1            | 0.057267000  | 7.433764000  | 0.881063000  |
| 1 | 1.054267000   | 0.290054000  | -6.508580000 | 1            | -4.153839000 | 8.120001000  | -0.000828000 |
| 1 | -0.182410000  | 0.832938000  | -7.651427000 | 1            | -3.047750000 | 8.257316000  | 1.359322000  |
| 1 | -0.725350000  | -0.932213000 | -5.192840000 | 1            | -4.950865000 | 5.937358000  | 0.766592000  |
| 1 | -1.948433000  | -0.409978000 | -6.340900000 | 1            | -5.105779000 | 7.078119000  | 2.097248000  |
| 1 | -0.314842000  | 1.479134000  | -4.544653000 | 1            | -4.526542000 | 6.095993000  | 4.158904000  |
| 1 | -1.452258000  | 2.002177000  | -5.770890000 | 1            | -2.213770000 | 2.815703000  | 1.451978000  |
| 1 | -3.299865000  | 0.738304000  | -4.581782000 | 1            | -3.065423000 | 4.968315000  | 4.309655000  |
| 1 | -2.626162000  | 2.082615000  | -3.652695000 | 1            | -0.340207000 | 5.376368000  | -1.055300000 |
| 1 | -1.611875000  | -0.674987000 | -3.195182000 | 1            | -2.949272000 | 6.165667000  | -0.777992000 |
| 1 | -3.004283000  | -0.144397000 | -2.438576000 | 1            | -1.830050000 | 7.506335000  | -0.699062000 |
| 1 | -1.542032000  | 0.583498000  | -2.174347000 | 1            | 0.119926000  | 4.516271000  | 0.416757000  |
| 1 | 0.194782000   | -0.892515000 | -7.509322000 | 1            | -4.676294000 | 3.522857000  | 1.467910000  |
| 6 | -2.046664000  | 1.748276000  | 4.559775000  |              |              |              |              |
| 6 | -2.412035000  | 1.337672000  | 5.968380000  |              |              |              |              |
| 6 | -3.723847000  | 0.951459000  | 6.287282000  |              |              |              |              |
| 6 | -1.444968000  | 1.305529000  | 6.984019000  |              |              |              |              |
| 6 | -4.053608000  | 0.525938000  | 7.578961000  |              |              |              |              |
| 6 | -1.772523000  | 0.892470000  | 8.276861000  |              |              |              |              |
| 6 | -3.078171000  | 0.494128000  | 8.577688000  |              |              |              |              |
| 1 | -1.399570000  | 2.634308000  | 4.557626000  |              |              |              |              |
| 1 | -2.939520000  | 1.971423000  | 3.968157000  |              |              |              |              |
| 1 | -4.493350000  | 1.006357000  | 5.520314000  |              |              |              |              |
| 1 | -0.425435000  | 1.614465000  | 6.761790000  |              |              |              |              |
| 1 | -5.072973000  | 0.222213000  | 7.800053000  |              |              |              |              |
| 1 | -1.009181000  | 0.884920000  | 9.050605000  |              |              |              |              |
| 1 | -3.333840000  | 0.172167000  | 9.583346000  |              |              |              |              |
| 1 | -1.501064000  | 0.946226000  | 4.044050000  |              |              |              |              |
| 6 | 7.496289000   | 5.924499000  | -3.611726000 |              |              |              |              |
| 6 | 7.237723000   | 5.649210000  | -2.148396000 |              |              |              |              |
| 6 | 6.014874000   | 5.996568000  | -1.552219000 |              |              |              |              |
| 6 | 8.200428000   | 5.011187000  | -1.351824000 |              |              |              |              |
| 6 | 5.753488000   | 5.700414000  | -0.212616000 |              |              |              |              |
| 6 | 7.946499000   | 4.716533000  | -0.008910000 |              |              |              |              |
| 6 | 6.717469000   | 5.053418000  | 0.569381000  |              |              |              |              |
| 1 | 6.953438000   | 6.812268000  | -3.953199000 |              |              |              |              |
|   |               |              |              | <b>5IM5:</b> |              |              |              |
|   |               |              |              | 26           | 0.376424000  | -0.745252000 | -0.361659000 |
|   |               |              |              | 8            | 0.972719000  | -0.231274000 | 1.438377000  |
|   |               |              |              | 6            | 1.104802000  | -0.879772000 | 2.557806000  |
|   |               |              |              | 8            | 0.560086000  | -1.954970000 | 2.833376000  |
|   |               |              |              | 6            | 1.980897000  | -0.199950000 | 3.618038000  |
|   |               |              |              | 6            | 2.924199000  | 0.891516000  | 3.120662000  |
|   |               |              |              | 7            | 4.011633000  | 0.346180000  | 2.310389000  |
|   |               |              |              | 6            | 5.212677000  | 0.977391000  | 2.218311000  |
|   |               |              |              | 8            | 5.486976000  | 2.008766000  | 2.824872000  |
|   |               |              |              | 6            | 6.238175000  | 0.335066000  | 1.273715000  |
|   |               |              |              | 7            | 6.354641000  | 1.145539000  | 0.067257000  |
|   |               |              |              | 1            | 2.530101000  | -0.982368000 | 4.152776000  |
|   |               |              |              | 1            | 1.288251000  | 0.241760000  | 4.347188000  |
|   |               |              |              | 1            | 2.359814000  | 1.639650000  | 2.551088000  |
|   |               |              |              | 1            | 3.800385000  | -0.411164000 | 1.672068000  |
|   |               |              |              | 1            | 3.392434000  | 1.406200000  | 3.963031000  |
|   |               |              |              | 1            | 5.970274000  | -0.675504000 | 0.962726000  |
|   |               |              |              | 1            | 6.578434000  | 2.130265000  | 0.187779000  |
|   |               |              |              | 1            | 7.197447000  | 0.301743000  | 1.800956000  |
|   |               |              |              | 6            | 6.136255000  | 0.650586000  | -1.168888000 |
|   |               |              |              | 8            | 5.930080000  | -0.544538000 | -1.409298000 |

|   |              |              |              |   |               |              |              |
|---|--------------|--------------|--------------|---|---------------|--------------|--------------|
| 6 | 6.074780000  | 1.690443000  | -2.298053000 | 1 | -0.692446000  | -3.078967000 | 7.356635000  |
| 6 | 4.715777000  | 2.463339000  | -2.249234000 | 1 | -0.447138000  | -2.094637000 | 5.074706000  |
| 6 | 3.517609000  | 1.571152000  | -2.205019000 | 1 | -1.472109000  | -3.522302000 | 5.014360000  |
| 6 | 2.720486000  | 1.194509000  | -1.151515000 | 1 | -2.928105000  | -0.993774000 | 5.369390000  |
| 7 | 3.043503000  | 0.854716000  | -3.292215000 | 1 | -2.734210000  | -2.926815000 | 1.819112000  |
| 6 | 2.016640000  | 0.084750000  | -2.878470000 | 1 | -1.257642000  | -2.515994000 | 2.668619000  |
| 7 | 1.794480000  | 0.266509000  | -1.581343000 | 1 | -4.852169000  | -1.176378000 | 3.988898000  |
| 1 | 6.877953000  | 2.428061000  | -2.196785000 | 1 | -4.479527000  | -1.291521000 | 2.277569000  |
| 1 | 4.715357000  | 3.107673000  | -1.365305000 | 1 | -2.459948000  | -2.933165000 | 7.260521000  |
| 1 | 4.691339000  | 3.119992000  | -3.123804000 | 8 | -0.905821000  | 0.611709000  | -0.603358000 |
| 1 | 2.756825000  | 1.517519000  | -0.122237000 | 6 | -7.930999000  | 0.952097000  | 7.542919000  |
| 1 | 3.388842000  | 0.907939000  | -4.257460000 | 6 | -7.221967000  | -0.329290000 | 7.167464000  |
| 1 | 1.466353000  | -0.593467000 | -3.512078000 | 6 | -6.425132000  | -1.012696000 | 8.098494000  |
| 7 | 6.233889000  | 0.959027000  | -3.540186000 | 6 | -7.375160000  | -0.886940000 | 5.889292000  |
| 6 | 6.406537000  | 1.560519000  | -4.740238000 | 6 | -5.803854000  | -2.219539000 | 7.768654000  |
| 8 | 6.509637000  | 2.775544000  | -4.890924000 | 6 | -6.760622000  | -2.098188000 | 5.556812000  |
| 6 | 6.472823000  | 0.594853000  | -5.937673000 | 6 | -5.969249000  | -2.768376000 | 6.494720000  |
| 7 | 5.747150000  | 1.114264000  | -7.080011000 | 1 | -8.156587000  | 1.555280000  | 6.657909000  |
| 1 | 6.112692000  | -0.045127000 | -3.454408000 | 1 | -7.331839000  | 1.559213000  | 8.230644000  |
| 1 | 6.074696000  | -0.389789000 | -5.671799000 | 1 | -6.301684000  | -0.600873000 | 9.098229000  |
| 1 | 7.519807000  | 0.469363000  | -6.228872000 | 1 | -7.993077000  | -0.379003000 | 5.153415000  |
| 1 | 6.272962000  | 1.543043000  | -7.828070000 | 1 | -5.201309000  | -2.736263000 | 8.511517000  |
| 6 | 4.402174000  | 1.305087000  | -7.033320000 | 1 | -6.916693000  | -2.527404000 | 4.569859000  |
| 8 | 3.733582000  | 0.943430000  | -6.057181000 | 1 | -5.501137000  | -3.715165000 | 6.239108000  |
| 6 | 3.788528000  | 1.985888000  | -8.243812000 | 1 | -8.883705000  | 0.740624000  | 8.046346000  |
| 6 | 3.861276000  | 3.537211000  | -8.166107000 | 6 | -11.266905000 | 0.473270000  | 3.031724000  |
| 1 | 4.300798000  | 1.652701000  | -9.154925000 | 6 | -9.847337000  | 0.993272000  | 3.037343000  |
| 1 | 2.745763000  | 1.665340000  | -8.308109000 | 6 | -9.514051000  | 2.192193000  | 3.678952000  |
| 1 | 4.908469000  | 3.843829000  | -8.055604000 | 6 | -8.821074000  | 0.306702000  | 2.368879000  |
| 1 | 3.524290000  | 3.922092000  | -9.135855000 | 6 | -8.209218000  | 2.692059000  | 3.660602000  |
| 6 | 3.029326000  | 4.151615000  | -7.059311000 | 6 | -7.514264000  | 0.790256000  | 2.333656000  |
| 6 | 3.607751000  | 4.501078000  | -5.831524000 | 6 | -7.206959000  | 1.988562000  | 2.987336000  |
| 6 | 1.661717000  | 4.392351000  | -7.250935000 | 8 | -5.901020000  | 2.420198000  | 2.947726000  |
| 6 | 2.833771000  | 5.075084000  | -4.819962000 | 1 | -11.852351000 | 0.897599000  | 3.854019000  |
| 6 | 0.886077000  | 4.962456000  | -6.240367000 | 1 | -11.296631000 | -0.617944000 | 3.126843000  |
| 6 | 1.471041000  | 5.305475000  | -5.019169000 | 1 | -10.285521000 | 2.751305000  | 4.203497000  |
| 1 | 4.668268000  | 4.325549000  | -5.667721000 | 1 | -9.050184000  | -0.623183000 | 1.852844000  |
| 1 | 1.202985000  | 4.145660000  | -8.206529000 | 1 | -7.973316000  | 3.624544000  | 4.169715000  |
| 1 | 3.300542000  | 5.356382000  | -3.879199000 | 1 | -6.736432000  | 0.261799000  | 1.789481000  |
| 1 | -0.169340000 | 5.156661000  | -6.413830000 | 1 | -5.846632000  | 3.353458000  | 3.224431000  |
| 1 | 0.873036000  | 5.763036000  | -4.235500000 | 1 | -11.784103000 | 0.729249000  | 2.097358000  |
| 7 | 1.936078000  | -2.389949000 | -0.230890000 | 6 | -6.582621000  | -8.277382000 | -1.679189000 |
| 6 | 1.716525000  | -3.561685000 | 0.341409000  | 6 | -5.922654000  | -7.056401000 | -1.079684000 |
| 7 | 2.871672000  | -4.265867000 | 0.432993000  | 6 | -6.344657000  | -5.763011000 | -1.413164000 |
| 6 | 3.899696000  | -3.505057000 | -0.104515000 | 6 | -4.881131000  | -7.177745000 | -0.148705000 |
| 6 | 3.292876000  | -2.342407000 | -0.508512000 | 6 | -5.762473000  | -4.630537000 | -0.843039000 |
| 6 | 5.317275000  | -3.966268000 | -0.194119000 | 6 | -4.288095000  | -6.059400000 | 0.434416000  |
| 1 | 5.421006000  | -4.843208000 | -0.845671000 | 6 | -4.729835000  | -4.776395000 | 0.091121000  |
| 1 | 5.929742000  | -3.161516000 | -0.609205000 | 8 | -4.120388000  | -3.701444000 | 0.670507000  |
| 1 | 3.756622000  | -1.498219000 | -0.994634000 | 1 | -7.033915000  | -8.052267000 | -2.651599000 |
| 1 | 2.963567000  | -5.189153000 | 0.833838000  | 1 | -7.382529000  | -8.663396000 | -1.032670000 |
| 1 | 0.762593000  | -3.907055000 | 0.705853000  | 1 | -7.145943000  | -5.633519000 | -2.137660000 |
| 1 | 5.724874000  | -4.234748000 | 0.788807000  | 1 | -4.526964000  | -8.168440000 | 0.129172000  |
| 8 | -0.935263000 | -2.345394000 | -0.195873000 | 1 | -6.095942000  | -3.634623000 | -1.123090000 |
| 6 | -1.051320000 | -2.538588000 | -1.457946000 | 1 | -3.487293000  | -6.164538000 | 1.161256000  |
| 8 | -0.376878000 | -1.796807000 | -2.241702000 | 1 | -4.559870000  | -2.845120000 | 0.416700000  |
| 6 | -1.998425000 | -3.578551000 | -1.980037000 | 1 | -5.865017000  | -9.092873000 | -1.824212000 |
| 1 | -2.054704000 | -4.432984000 | -1.303118000 | 6 | 0.129287000   | 0.545449000  | -6.901972000 |
| 1 | -2.997542000 | -3.127508000 | -2.019202000 | 6 | -0.984604000  | 0.283284000  | -5.882426000 |
| 1 | -1.704459000 | -3.896630000 | -2.983022000 | 6 | -1.273758000  | 1.496558000  | -4.983652000 |
| 7 | -2.277178000 | -2.591420000 | 2.666846000  | 6 | -2.462017000  | 1.297771000  | -4.040886000 |
| 6 | -2.992625000 | -1.912054000 | 3.570365000  | 7 | -2.190675000  | 0.281021000  | -2.982726000 |
| 7 | -4.200258000 | -1.426055000 | 3.256640000  | 1 | 1.085212000   | 0.770172000  | -6.415618000 |
| 7 | -2.515449000 | -1.736687000 | 4.815746000  | 1 | -0.125353000  | 1.396720000  | -7.544930000 |
| 6 | -1.409575000 | -2.500645000 | 5.404065000  | 1 | -0.709079000  | -0.589806000 | -5.272341000 |
| 6 | -1.513004000 | -2.495873000 | 6.926859000  | 1 | -1.906869000  | 0.005128000  | -6.411394000 |
| 1 | -1.445974000 | -1.476703000 | 7.323480000  | 1 | -0.379963000  | 1.766279000  | -4.404180000 |

|   |              |              |              |                |              |              |               |
|---|--------------|--------------|--------------|----------------|--------------|--------------|---------------|
| 1 | -1.497763000 | 2.365469000  | -5.615464000 | 1              | -3.040187000 | 2.971553000  | 1.252710000   |
| 1 | -3.343746000 | 0.963928000  | -4.597406000 | 1              | -4.306560000 | 5.102382000  | 3.943502000   |
| 1 | -2.723772000 | 2.225253000  | -3.524640000 | 1              | -1.082244000 | 5.709519000  | -1.083703000  |
| 1 | -1.667606000 | -0.535363000 | -3.321300000 | 1              | -3.811740000 | 6.115257000  | -1.249325000  |
| 1 | -3.069688000 | -0.105894000 | -2.522405000 | 1              | -2.906484000 | 7.605650000  | -1.041466000  |
| 1 | -1.615711000 | 0.627355000  | -2.168206000 | 1              | -0.702775000 | 4.988722000  | 0.480986000   |
| 1 | 0.278304000  | -0.327946000 | -7.546466000 | 1              | -5.502842000 | 3.447597000  | 0.806106000   |
| 6 | -0.678941000 | 2.669899000  | 3.870358000  |                |              |              |               |
| 6 | -1.613646000 | 2.169882000  | 4.949071000  |                |              |              |               |
| 6 | -2.964902000 | 1.917374000  | 4.664880000  |                |              |              |               |
| 6 | -1.158514000 | 1.947963000  | 6.255978000  |                |              |              |               |
| 6 | -3.834541000 | 1.458726000  | 5.657243000  |                |              |              |               |
| 6 | -2.021909000 | 1.481928000  | 7.251884000  |                |              |              |               |
| 6 | -3.364658000 | 1.233395000  | 6.956124000  |                |              |              |               |
| 1 | 0.284438000  | 2.979721000  | 4.288876000  |                |              |              |               |
| 1 | -1.103397000 | 3.534045000  | 3.345619000  |                |              |              |               |
| 1 | -3.352108000 | 2.076409000  | 3.661635000  |                |              |              |               |
| 1 | -0.118695000 | 2.153390000  | 6.501400000  |                |              |              |               |
| 1 | -4.880549000 | 1.291310000  | 5.415540000  |                |              |              |               |
| 1 | -1.647699000 | 1.327811000  | 8.260768000  |                |              |              |               |
| 1 | -4.042659000 | 0.874727000  | 7.725184000  |                |              |              |               |
| 1 | -0.483530000 | 1.901678000  | 3.110516000  |                |              |              |               |
| 6 | 8.146813000  | 5.582320000  | -3.112205000 |                |              |              |               |
| 6 | 7.793282000  | 5.212206000  | -1.690340000 |                |              |              |               |
| 6 | 6.571330000  | 5.609659000  | -1.124061000 |                |              |              |               |
| 6 | 8.660935000  | 4.437532000  | -0.906362000 |                |              |              |               |
| 6 | 6.218168000  | 5.230650000  | 0.172481000  |                |              |              |               |
| 6 | 8.314551000  | 4.058181000  | 0.394335000  |                |              |              |               |
| 6 | 7.086522000  | 4.446364000  | 0.940913000  |                |              |              |               |
| 1 | 7.731222000  | 6.558062000  | -3.385798000 |                |              |              |               |
| 1 | 9.231485000  | 5.624242000  | -3.256338000 |                |              |              |               |
| 1 | 5.893951000  | 6.230149000  | -1.707118000 |                |              |              |               |
| 1 | 9.623184000  | 4.137512000  | -1.315454000 |                |              |              |               |
| 1 | 5.270518000  | 5.558239000  | 0.592671000  |                |              |              |               |
| 1 | 9.011001000  | 3.470053000  | 0.987082000  |                |              |              |               |
| 1 | 6.808289000  | 4.138432000  | 1.944474000  |                |              |              |               |
| 1 | 7.745277000  | 4.842251000  | -3.816869000 |                |              |              |               |
| 8 | -4.117300000 | -0.954033000 | -1.590801000 |                |              |              |               |
| 6 | -4.422545000 | -0.522755000 | -0.449968000 |                |              |              |               |
| 8 | -4.913596000 | -1.191955000 | 0.504481000  |                |              |              |               |
| 6 | -4.117981000 | 0.921263000  | -0.143628000 |                |              |              |               |
| 7 | -4.819464000 | 1.912264000  | -0.334890000 |                |              |              |               |
| 6 | -4.734184000 | 3.313366000  | 0.041000000  |                |              |              |               |
| 1 | -1.678982000 | 0.646543000  | -0.004765000 |                |              |              |               |
| 1 | -5.037615000 | 3.898323000  | -0.835210000 |                |              |              |               |
| 6 | -2.537154000 | 6.144421000  | 0.521095000  |                |              |              |               |
| 6 | -3.334202000 | 5.118333000  | 1.393044000  |                |              |              |               |
| 6 | -3.361567000 | 3.765468000  | 0.568961000  |                |              |              |               |
| 6 | -1.527471000 | 5.227201000  | -0.204439000 |                |              |              |               |
| 6 | -2.302276000 | 3.944468000  | -0.554949000 |                |              |              |               |
| 6 | -3.476228000 | 6.841740000  | -0.495779000 |                |              |              |               |
| 6 | -4.646747000 | 5.669916000  | 1.920287000  |                |              |              |               |
| 6 | -1.823514000 | 7.188543000  | 1.394763000  |                |              |              |               |
| 6 | -4.715190000 | 7.472539000  | 0.155006000  |                |              |              |               |
| 6 | -5.524106000 | 6.420153000  | 0.938804000  |                |              |              |               |
| 6 | -4.967732000 | 5.579270000  | 3.221617000  |                |              |              |               |
| 1 | -2.709279000 | 4.908528000  | 2.270646000  |                |              |              |               |
| 1 | -2.807414000 | 4.062167000  | -1.523823000 |                |              |              |               |
| 1 | -1.643411000 | 3.075188000  | -0.641548000 |                |              |              |               |
| 1 | -1.129126000 | 6.702745000  | 2.091215000  |                |              |              |               |
| 1 | -2.526035000 | 7.778012000  | 1.993114000  |                |              |              |               |
| 1 | -1.243692000 | 7.885749000  | 0.777622000  |                |              |              |               |
| 1 | -5.352823000 | 7.925445000  | -0.613626000 |                |              |              |               |
| 1 | -4.418822000 | 8.283850000  | 0.830796000  |                |              |              |               |
| 1 | -5.966889000 | 5.720091000  | 0.216521000  |                |              |              |               |
| 1 | -6.360045000 | 6.891048000  | 1.468042000  |                |              |              |               |
| 1 | -5.876489000 | 6.029511000  | 3.616471000  |                |              |              |               |
|   |              |              |              | <b>5Prodi:</b> |              |              |               |
|   |              |              |              | 26             | 0.543279000  | 0.138851000  | -0.551589000  |
|   |              |              |              | 8              | 1.287204000  | 0.979593000  | 1.156099000   |
|   |              |              |              | 6              | 1.039516000  | 1.078861000  | 2.409755000   |
|   |              |              |              | 8              | 0.111797000  | 0.521765000  | 3.031122000   |
|   |              |              |              | 6              | 1.993902000  | 1.968296000  | 3.223982000   |
|   |              |              |              | 6              | 3.154520000  | 2.586125000  | 2.448391000   |
|   |              |              |              | 7              | 4.053890000  | 1.566879000  | 1.914562000   |
|   |              |              |              | 6              | 5.387485000  | 1.782772000  | 1.776644000   |
|   |              |              |              | 8              | 5.961187000  | 2.801917000  | 2.154059000   |
|   |              |              |              | 6              | 6.177757000  | 0.670564000  | 1.072300000   |
|   |              |              |              | 7              | 6.586090000  | 1.156188000  | -0.241265000  |
|   |              |              |              | 1              | 2.370673000  | 1.370086000  | 4.062678000   |
|   |              |              |              | 1              | 1.391034000  | 2.769878000  | 3.668411000   |
|   |              |              |              | 1              | 2.767018000  | 3.210485000  | 1.632258000   |
|   |              |              |              | 1              | 3.612993000  | 0.790495000  | 1.435814000   |
|   |              |              |              | 1              | 3.755211000  | 3.228628000  | 3.095892000   |
|   |              |              |              | 1              | 5.603404000  | -0.244626000 | 0.920543000   |
|   |              |              |              | 1              | 6.998345000  | 2.084522000  | -0.283627000  |
|   |              |              |              | 1              | 7.054086000  | 0.439556000  | 1.688612000   |
|   |              |              |              | 6              | 6.376343000  | 0.459633000  | -1.378592000  |
|   |              |              |              | 8              | 5.973115000  | -0.708075000 | -1.408436000  |
|   |              |              |              | 6              | 6.578963000  | 1.247343000  | -2.682910000  |
|   |              |              |              | 6              | 5.401945000  | 2.258749000  | -2.884256000  |
|   |              |              |              | 6              | 4.046822000  | 1.645683000  | -2.733057000  |
|   |              |              |              | 6              | 3.184080000  | 1.632409000  | -1.662203000  |
|   |              |              |              | 7              | 3.439332000  | 0.853941000  | -3.691018000  |
|   |              |              |              | 6              | 2.271554000  | 0.398309000  | -3.182661000  |
|   |              |              |              | 7              | 2.084941000  | 0.849101000  | -1.948894000  |
|   |              |              |              | 1              | 7.511458000  | 1.821428000  | -2.655936000  |
|   |              |              |              | 1              | 5.513137000  | 3.064886000  | -2.153005000  |
|   |              |              |              | 1              | 5.531142000  | 2.705720000  | -3.874418000  |
|   |              |              |              | 1              | 3.293628000  | 2.117163000  | -0.703508000  |
|   |              |              |              | 1              | 3.798039000  | 0.642669000  | -4.627290000  |
|   |              |              |              | 1              | 1.591567000  | -0.251020000 | -3.712977000  |
|   |              |              |              | 7              | 6.636315000  | 0.268849000  | -3.752380000  |
|   |              |              |              | 6              | 6.961596000  | 0.579583000  | -5.028264000  |
|   |              |              |              | 8              | 7.320432000  | 1.697344000  | -5.393146000  |
|   |              |              |              | 6              | 6.863308000  | -0.593814000 | -6.020997000  |
|   |              |              |              | 7              | 6.263396000  | -0.189039000 | -7.277857000  |
|   |              |              |              | 1              | 6.297158000  | -0.652329000 | -3.493717000  |
|   |              |              |              | 1              | 6.285180000  | -1.420303000 | -5.595274000  |
|   |              |              |              | 1              | 7.873584000  | -0.957803000 | -6.230014000  |
|   |              |              |              | 1              | 6.868605000  | -0.017370000 | -8.067707000  |
|   |              |              |              | 6              | 4.966517000  | 0.218445000  | -7.340165000  |
|   |              |              |              | 8              | 4.234080000  | 0.176709000  | -6.346600000  |
|   |              |              |              | 6              | 4.484204000  | 0.704190000  | -8.696982000  |
|   |              |              |              | 6              | 4.921787000  | 2.158599000  | -9.026919000  |
|   |              |              |              | 1              | 4.862395000  | 0.034268000  | -9.479790000  |
|   |              |              |              | 1              | 3.393478000  | 0.636732000  | -8.691620000  |
|   |              |              |              | 1              | 6.016395000  | 2.225514000  | -8.992320000  |
|   |              |              |              | 1              | 4.632219000  | 2.352720000  | -10.066362000 |
|   |              |              |              | 6              | 4.316048000  | 3.214296000  | -8.124855000  |
|   |              |              |              | 6              | 4.992472000  | 3.657005000  | -6.979890000  |
|   |              |              |              | 6              | 3.063719000  | 3.768392000  | -8.423543000  |
|   |              |              |              | 6              | 4.425765000  | 4.630818000  | -6.154246000  |
|   |              |              |              | 6              | 2.494728000  | 4.738923000  | -7.597507000  |
|   |              |              |              | 6              | 3.175931000  | 5.173821000  | -6.458668000  |
|   |              |              |              | 1              | 5.963665000  | 3.237056000  | -6.730454000  |



|   |               |              |              |   |               |              |              |
|---|---------------|--------------|--------------|---|---------------|--------------|--------------|
| 1 | 2.534658000   | 3.445499000  | -9.318091000 | 1 | -8.665780000  | 2.384092000  | 4.447964000  |
| 1 | 4.969965000   | 4.974735000  | -5.278074000 | 1 | -6.792210000  | -0.599908000 | 1.988666000  |
| 1 | 1.527153000   | 5.164301000  | -7.850782000 | 1 | -6.592485000  | 2.630810000  | 3.411433000  |
| 1 | 2.740758000   | 5.938402000  | -5.820614000 | 1 | -11.869557000 | -1.264691000 | 2.898496000  |
| 7 | 1.721979000   | -1.712062000 | -0.107137000 | 6 | -8.661988000  | -7.131836000 | 0.375135000  |
| 6 | 1.304124000   | -2.740297000 | 0.607829000  | 6 | -7.791429000  | -5.896381000 | 0.363238000  |
| 7 | 2.326978000   | -3.605659000 | 0.839866000  | 6 | -8.247704000  | -4.690911000 | -0.184268000 |
| 6 | 3.471787000   | -3.103594000 | 0.237471000  | 6 | -6.485054000  | -5.924803000 | 0.872842000  |
| 6 | 3.067719000   | -1.927600000 | -0.342737000 | 6 | -7.439854000  | -3.552662000 | -0.227522000 |
| 6 | 4.799344000   | -3.786822000 | 0.269554000  | 6 | -5.659779000  | -4.800972000 | 0.833985000  |
| 1 | 4.780069000   | -4.749637000 | -0.257245000 | 6 | -6.141104000  | -3.611806000 | 0.282314000  |
| 1 | 5.539547000   | -3.147411000 | -0.218748000 | 8 | -5.299401000  | -2.512748000 | 0.285200000  |
| 1 | 3.668666000   | -1.241596000 | -0.919813000 | 1 | -9.725714000  | -6.872653000 | 0.366012000  |
| 1 | 2.262325000   | -4.469724000 | 1.359343000  | 1 | -8.473307000  | -7.748214000 | 1.260752000  |
| 1 | 0.296961000   | -2.880058000 | 0.970847000  | 1 | -9.256191000  | -4.634132000 | -0.586933000 |
| 1 | 5.138861000   | -3.977609000 | 1.295763000  | 1 | -6.098730000  | -6.848143000 | 1.298901000  |
| 8 | -1.306321000  | -1.185254000 | -0.219732000 | 1 | -7.817403000  | -2.629060000 | -0.657759000 |
| 6 | -1.340557000  | -1.403449000 | -1.470738000 | 1 | -4.645534000  | -4.838692000 | 1.220147000  |
| 8 | -0.514911000  | -0.826694000 | -2.244732000 | 1 | -5.645847000  | -1.833334000 | -0.320351000 |
| 6 | -2.343166000  | -2.385898000 | -2.042323000 | 1 | -8.473250000  | -7.761890000 | -0.504167000 |
| 1 | -3.195692000  | -2.515266000 | -1.370967000 | 6 | 0.497383000   | 0.860458000  | -6.828717000 |
| 1 | -2.675271000  | -2.061508000 | -3.032387000 | 6 | -0.696004000  | 0.945804000  | -5.870059000 |
| 1 | -1.853274000  | -3.359544000 | -2.167331000 | 6 | -0.830359000  | 2.320264000  | -5.194822000 |
| 7 | -1.847107000  | -1.391256000 | 2.467455000  | 6 | -2.100301000  | 2.480359000  | -4.353112000 |
| 6 | -2.742995000  | -1.847845000 | 3.336196000  | 7 | -2.064604000  | 1.661156000  | -3.124510000 |
| 7 | -3.891560000  | -2.398583000 | 2.896855000  | 1 | 1.452552000   | 1.008063000  | -6.312177000 |
| 7 | -2.508452000  | -1.809743000 | 4.660184000  | 1 | 0.427865000   | 1.627298000  | -7.609998000 |
| 6 | -1.196198000  | -1.546900000 | 5.266676000  | 1 | -0.605600000  | 0.157430000  | -5.110028000 |
| 6 | -1.331164000  | -1.443691000 | 6.782491000  | 1 | -1.621359000  | 0.731918000  | -6.424193000 |
| 1 | -1.979505000  | -0.606986000 | 7.060996000  | 1 | 0.050639000   | 2.517253000  | -4.567794000 |
| 1 | -0.346330000  | -1.273459000 | 7.227836000  | 1 | -0.838415000  | 3.096900000  | -5.971702000 |
| 1 | -0.787966000  | -0.617784000 | 4.862287000  | 1 | -2.974286000  | 2.229232000  | -4.974568000 |
| 1 | -0.503298000  | -2.356136000 | 4.995600000  | 1 | -2.215001000  | 3.528510000  | -4.050897000 |
| 1 | -3.236332000  | -2.164520000 | 5.270214000  | 1 | -1.766065000  | 0.707434000  | -3.330540000 |
| 1 | -2.002060000  | -1.454607000 | 1.457709000  | 1 | -3.000601000  | 1.590071000  | -2.720601000 |
| 1 | -1.097828000  | -0.728401000 | 2.726974000  | 1 | -1.120892000  | 1.942708000  | -1.772053000 |
| 1 | -4.549976000  | -2.805989000 | 3.550193000  | 1 | 0.536454000   | -0.117915000 | -7.321785000 |
| 1 | -4.221053000  | -2.253882000 | 1.945032000  | 6 | -0.309450000  | 2.796322000  | 6.581100000  |
| 1 | -1.737559000  | -2.366239000 | 7.213550000  | 6 | -1.787897000  | 2.509490000  | 6.449262000  |
| 8 | -0.597492000  | 1.990395000  | -0.890948000 | 6 | -2.322858000  | 2.048412000  | 5.235920000  |
| 6 | -6.598611000  | -1.284755000 | 6.791039000  | 6 | -2.658910000  | 2.715762000  | 7.528750000  |
| 6 | -5.995209000  | -2.592155000 | 6.333588000  | 6 | -3.692777000  | 1.805308000  | 5.105603000  |
| 6 | -4.944462000  | -3.190054000 | 7.049578000  | 6 | -4.028636000  | 2.476341000  | 7.402793000  |
| 6 | -6.486550000  | -3.259847000 | 5.201280000  | 6 | -4.550311000  | 2.021578000  | 6.188825000  |
| 6 | -4.407841000  | -4.418791000 | 6.652441000  | 1 | 0.046803000   | 2.617838000  | 7.601515000  |
| 6 | -5.955084000  | -4.491972000 | 4.801882000  | 1 | -0.085403000  | 3.844852000  | 6.341898000  |
| 6 | -4.911417000  | -5.074761000 | 5.525943000  | 1 | -1.656441000  | 1.860985000  | 4.396304000  |
| 1 | -7.234337000  | -0.844463000 | 6.016929000  | 1 | -2.259482000  | 3.068097000  | 8.477295000  |
| 1 | -5.823667000  | -0.555090000 | 7.051157000  | 1 | -4.098967000  | 1.446641000  | 4.163725000  |
| 1 | -4.557512000  | -2.695872000 | 7.938277000  | 1 | -4.686135000  | 2.643587000  | 8.252150000  |
| 1 | -7.299320000  | -2.812684000 | 4.634326000  | 1 | -5.615032000  | 1.829320000  | 6.086351000  |
| 1 | -3.604383000  | -4.868546000 | 7.230256000  | 1 | 0.276500000   | 2.173086000  | 5.897924000  |
| 1 | -6.357495000  | -4.991803000 | 3.924608000  | 6 | 9.376753000   | 4.461931000  | -4.165107000 |
| 1 | -4.500257000  | -6.033034000 | 5.221168000  | 6 | 8.999567000   | 4.399229000  | -2.703354000 |
| 1 | -7.218013000  | -1.433335000 | 7.685036000  | 6 | 7.900741000   | 5.118838000  | -2.208526000 |
| 6 | -11.099326000 | -1.546120000 | 3.629047000  | 6 | 9.716728000   | 3.592487000  | -1.806837000 |
| 6 | -9.869866000  | -0.676245000 | 3.498246000  | 6 | 7.518213000   | 5.022328000  | -0.868837000 |
| 6 | -9.803886000  | 0.581724000  | 4.111125000  | 6 | 9.341162000   | 3.495062000  | -0.464277000 |
| 6 | -8.765835000  | -1.084116000 | 2.734607000  | 6 | 8.234895000   | 4.205960000  | 0.013569000  |
| 6 | -8.689723000  | 1.409815000  | 3.964481000  | 1 | 9.100713000   | 5.424730000  | -4.608233000 |
| 6 | -7.642225000  | -0.272256000 | 2.580052000  | 1 | 10.453569000  | 4.320263000  | -4.306567000 |
| 6 | -7.603472000  | 0.984103000  | 3.192776000  | 1 | 7.343973000   | 5.766616000  | -2.882483000 |
| 8 | -6.479414000  | 1.748931000  | 3.006091000  | 1 | 10.583596000  | 3.040956000  | -2.164348000 |
| 1 | -11.551503000 | -1.457695000 | 4.623046000  | 1 | 6.667651000   | 5.593589000  | -0.505544000 |
| 1 | -10.863075000 | -2.602105000 | 3.460592000  | 1 | 9.919362000   | 2.871000000  | 0.212715000  |
| 1 | -10.640137000 | 0.927864000  | 4.714336000  | 1 | 7.928561000   | 4.121601000  | 1.052004000  |
| 1 | -8.785593000  | -2.053178000 | 2.240089000  | 1 | 8.860358000   | 3.675159000  | -4.730239000 |

|                           |              |              |              |   |              |              |              |
|---------------------------|--------------|--------------|--------------|---|--------------|--------------|--------------|
| 8                         | -4.868443000 | -0.269571000 | -3.935767000 | 1 | 7.372221000  | 2.329357000  | -2.337742000 |
| 6                         | -5.495369000 | -0.631698000 | -3.022378000 | 1 | 5.159274000  | 3.254385000  | -2.087388000 |
| 8                         | -6.139319000 | -1.036999000 | -2.129677000 | 1 | 5.374981000  | 2.686194000  | -3.737798000 |
| 6                         | -4.818564000 | 1.700521000  | -1.262778000 | 1 | 2.992642000  | 2.153973000  | -0.673140000 |
| 7                         | -5.108065000 | 2.534519000  | -0.493462000 | 1 | 4.094294000  | 0.236823000  | -4.275685000 |
| 6                         | -5.437622000 | 3.565971000  | 0.444144000  | 1 | 1.983987000  | -0.874296000 | -3.393709000 |
| 1                         | 0.070452000  | 2.680611000  | -1.028060000 | 7 | 6.840654000  | 0.496536000  | -3.194594000 |
| 1                         | -5.850114000 | 4.399466000  | -0.132562000 | 6 | 7.176497000  | 0.658654000  | -4.495934000 |
| 6                         | -3.730263000 | 6.357067000  | 1.956320000  | 8 | 7.315489000  | 1.753116000  | -5.037976000 |
| 6                         | -4.442992000 | 5.037387000  | 2.409944000  | 6 | 7.397170000  | -0.653798000 | -5.270493000 |
| 6                         | -4.196080000 | 3.990247000  | 1.249303000  | 7 | 6.824222000  | -0.594630000 | -6.601133000 |
| 6                         | -2.538485000 | 5.808982000  | 1.138345000  | 1 | 6.673552000  | -0.420698000 | -2.793267000 |
| 6                         | -3.090836000 | 4.610083000  | 0.349263000  | 1 | 6.970033000  | -1.504877000 | -4.730341000 |
| 6                         | -4.667720000 | 7.206354000  | 1.060944000  | 1 | 8.473687000  | -0.820440000 | -5.370837000 |
| 6                         | -5.861039000 | 5.270114000  | 2.902104000  | 1 | 7.439224000  | -0.439824000 | -7.386923000 |
| 6                         | -3.250897000 | 7.179287000  | 3.163124000  | 6 | 5.481430000  | -0.475473000 | -6.775845000 |
| 6                         | -6.041506000 | 7.472215000  | 1.693294000  | 8 | 4.706054000  | -0.504987000 | -5.814188000 |
| 6                         | -6.754945000 | 6.153582000  | 2.055711000  | 6 | 5.002123000  | -0.301314000 | -8.205801000 |
| 6                         | -6.262135000 | 4.819925000  | 4.103562000  | 6 | 5.013005000  | 1.183120000  | -8.667653000 |
| 1                         | -3.873002000 | 4.651078000  | 3.262838000  | 1 | 5.629240000  | -0.889951000 | -8.886708000 |
| 1                         | -3.529117000 | 4.949911000  | -0.598110000 | 1 | 3.984562000  | -0.697981000 | -8.255555000 |
| 1                         | -2.318751000 | 3.878467000  | 0.092079000  | 1 | 6.030466000  | 1.581730000  | -8.574718000 |
| 1                         | -2.565769000 | 6.591641000  | 3.785922000  | 1 | 4.771762000  | 1.188788000  | -9.737077000 |
| 1                         | -4.078387000 | 7.501786000  | 3.804022000  | 6 | 4.043651000  | 2.078856000  | -7.924111000 |
| 1                         | -2.715401000 | 8.077592000  | 2.832516000  | 6 | 4.470150000  | 2.860781000  | -6.841549000 |
| 1                         | -6.667484000 | 8.049007000  | 1.001871000  | 6 | 2.699592000  | 2.148460000  | -8.315312000 |
| 1                         | -5.931762000 | 8.083744000  | 2.597016000  | 6 | 3.572233000  | 3.692727000  | -6.168698000 |
| 1                         | -7.034447000 | 5.644163000  | 1.123161000  | 6 | 1.799785000  | 2.977712000  | -7.643454000 |
| 1                         | -7.690857000 | 6.357300000  | 2.588025000  | 6 | 2.234847000  | 3.754655000  | -6.566462000 |
| 1                         | -7.252090000 | 5.051738000  | 4.492427000  | 1 | 5.510366000  | 2.820091000  | -6.526877000 |
| 1                         | -3.823196000 | 3.073359000  | 1.717888000  | 1 | 2.357195000  | 1.561319000  | -9.165164000 |
| 1                         | -5.593298000 | 4.269683000  | 4.762418000  | 1 | 3.923123000  | 4.308882000  | -5.344681000 |
| 1                         | -2.090344000 | 6.572889000  | 0.491237000  | 1 | 0.766905000  | 3.035905000  | -7.977687000 |
| 1                         | -4.818862000 | 6.700904000  | 0.096978000  | 1 | 1.542795000  | 4.420276000  | -6.056838000 |
| 1                         | -4.171818000 | 8.157838000  | 0.828567000  | 7 | 2.090980000  | -1.798938000 | 0.382348000  |
| 1                         | -1.753810000 | 5.473042000  | 1.829549000  | 6 | 1.756889000  | -2.831063000 | 1.137684000  |
| 1                         | -6.216625000 | 3.168894000  | 1.099906000  | 7 | 2.863768000  | -3.529467000 | 1.495240000  |
|                           |              |              |              | 6 | 3.976070000  | -2.910405000 | 0.942081000  |
|                           |              |              |              | 6 | 3.468522000  | -1.838283000 | 0.253851000  |
|                           |              |              |              | 6 | 5.376007000  | -3.398024000 | 1.120389000  |
|                           |              |              |              | 1 | 5.528358000  | -4.385533000 | 0.666673000  |
|                           |              |              |              | 1 | 6.061951000  | -2.694601000 | 0.640932000  |
|                           |              |              |              | 1 | 4.016011000  | -1.107046000 | -0.321788000 |
|                           |              |              |              | 1 | 2.874077000  | -4.363257000 | 2.066319000  |
|                           |              |              |              | 1 | 0.752843000  | -3.086502000 | 1.443546000  |
|                           |              |              |              | 1 | 5.651939000  | -3.472560000 | 2.179757000  |
|                           |              |              |              | 8 | -0.780898000 | -1.430935000 | -0.658806000 |
|                           |              |              |              | 6 | -0.932834000 | -1.893418000 | -1.863035000 |
|                           |              |              |              | 8 | -0.274804000 | -1.469250000 | -2.837115000 |
|                           |              |              |              | 6 | -1.966304000 | -2.983585000 | -2.030398000 |
|                           |              |              |              | 1 | -2.958794000 | -2.573674000 | -1.808702000 |
|                           |              |              |              | 1 | -1.945716000 | -3.380660000 | -3.046393000 |
|                           |              |              |              | 1 | -1.780014000 | -3.789690000 | -1.312343000 |
|                           |              |              |              | 7 | -1.789968000 | -1.673075000 | 2.021326000  |
|                           |              |              |              | 6 | -2.796248000 | -2.242902000 | 2.690799000  |
|                           |              |              |              | 7 | -3.837644000 | -2.758498000 | 2.018214000  |
|                           |              |              |              | 7 | -2.731405000 | -2.378074000 | 4.025156000  |
|                           |              |              |              | 6 | -1.583468000 | -1.976086000 | 4.844874000  |
|                           |              |              |              | 6 | -1.656886000 | -2.621236000 | 6.224683000  |
|                           |              |              |              | 1 | -2.544119000 | -2.284598000 | 6.771081000  |
|                           |              |              |              | 1 | -0.786258000 | -2.323905000 | 6.815561000  |
|                           |              |              |              | 1 | -1.551372000 | -0.884818000 | 4.939937000  |
|                           |              |              |              | 1 | -0.671021000 | -2.284744000 | 4.323312000  |
|                           |              |              |              | 1 | -3.572677000 | -2.678175000 | 4.505118000  |
|                           |              |              |              | 1 | -1.793895000 | -1.649691000 | 1.001086000  |
|                           |              |              |              | 1 | -1.124828000 | -1.031611000 | 2.461168000  |
|                           |              |              |              | 1 | -4.572977000 | -3.228179000 | 2.534540000  |
| <b><sup>5</sup>Prod2:</b> |              |              |              |   |              |              |              |
| 26                        | 0.759175000  | -0.217344000 | -0.295689000 | 6 | 5.376007000  | -3.398024000 | 1.120389000  |
| 8                         | 1.346437000  | 1.121299000  | 1.081535000  | 1 | 5.528358000  | -4.385533000 | 0.666673000  |
| 6                         | 1.046017000  | 1.006730000  | 2.341022000  | 1 | 6.061951000  | -2.694601000 | 0.640932000  |
| 8                         | 0.291062000  | 0.144141000  | 2.811457000  | 1 | 4.016011000  | -1.107046000 | -0.321788000 |
| 6                         | 1.702302000  | 2.029911000  | 3.273030000  | 1 | 2.874077000  | -4.363257000 | 2.066319000  |
| 6                         | 2.815668000  | 2.868209000  | 2.645409000  | 1 | 0.752843000  | -3.086502000 | 1.443546000  |
| 7                         | 3.926844000  | 2.032777000  | 2.196221000  | 1 | 5.651939000  | -3.472560000 | 2.179757000  |
| 6                         | 5.201422000  | 2.500253000  | 2.120584000  | 8 | -0.780898000 | -1.430935000 | -0.658806000 |
| 8                         | 5.544654000  | 3.619119000  | 2.490140000  | 6 | -0.932834000 | -1.893418000 | -1.863035000 |
| 6                         | 6.224776000  | 1.527938000  | 1.512408000  | 8 | -0.274804000 | -1.469250000 | -2.837115000 |
| 7                         | 6.482501000  | 1.892164000  | 0.123127000  | 6 | -1.966304000 | -2.983585000 | -2.030398000 |
| 1                         | 2.067619000  | 1.492873000  | 4.155253000  | 1 | -2.958794000 | -2.573674000 | -1.808702000 |
| 1                         | 0.906574000  | 2.697701000  | 3.627170000  | 1 | -1.945716000 | -3.380660000 | -3.046393000 |
| 1                         | 2.416026000  | 3.453866000  | 1.807591000  | 1 | -1.780014000 | -3.789690000 | -1.312343000 |
| 1                         | 3.682675000  | 1.185934000  | 1.698324000  | 7 | -1.789968000 | -1.673075000 | 2.021326000  |
| 1                         | 3.222341000  | 3.574796000  | 3.372452000  | 6 | -2.796248000 | -2.242902000 | 2.690799000  |
| 1                         | 5.888585000  | 0.489887000  | 1.517440000  | 7 | -3.837644000 | -2.758498000 | 2.018214000  |
| 1                         | 6.758957000  | 2.852858000  | -0.063229000 | 7 | -2.731405000 | -2.378074000 | 4.025156000  |
| 1                         | 7.143392000  | 1.606246000  | 2.103403000  | 6 | -1.583468000 | -1.976086000 | 4.844874000  |
| 6                         | 6.417930000  | 1.004462000  | -0.891767000 | 6 | -1.656886000 | -2.621236000 | 6.224683000  |
| 8                         | 6.203186000  | -0.203782000 | -0.741979000 | 1 | -2.544119000 | -2.284598000 | 6.771081000  |
| 6                         | 6.553007000  | 1.602818000  | -2.301421000 | 1 | -0.786258000 | -2.323905000 | 6.815561000  |
| 6                         | 5.243098000  | 2.354467000  | -2.703949000 | 1 | -1.551372000 | -0.884818000 | 4.939937000  |
| 6                         | 4.001576000  | 1.537190000  | -2.548485000 | 1 | -0.671021000 | -2.284744000 | 4.323312000  |
| 6                         | 3.053255000  | 1.532660000  | -1.553800000 | 1 | -3.572677000 | -2.678175000 | 4.505118000  |
| 7                         | 3.621700000  | 0.524453000  | -3.411251000 | 1 | -1.793895000 | -1.649691000 | 1.001086000  |
| 6                         | 2.499460000  | -0.048122000 | -2.926934000 | 1 | -1.124828000 | -1.031611000 | 2.461168000  |
| 7                         | 2.120650000  | 0.540821000  | -1.795643000 | 1 | -4.572977000 | -3.228179000 | 2.534540000  |

|   |               |              |              |   |              |              |              |
|---|---------------|--------------|--------------|---|--------------|--------------|--------------|
| 1 | -4.095563000  | -2.383406000 | 1.095930000  | 6 | -0.221285000 | 1.614245000  | 6.650087000  |
| 1 | -1.674870000  | -3.714079000 | 6.152422000  | 6 | -1.337830000 | 1.025200000  | 7.483228000  |
| 8 | -0.663267000  | 1.765623000  | -0.704250000 | 6 | -2.661048000 | 1.040335000  | 7.013996000  |
| 6 | -6.220587000  | -2.398590000 | 6.599250000  | 6 | -1.084001000 | 0.462547000  | 8.741205000  |
| 6 | -5.972005000  | -3.483014000 | 5.575389000  | 6 | -3.697976000 | 0.513042000  | 7.786399000  |
| 6 | -5.128059000  | -4.569819000 | 5.857860000  | 6 | -2.119097000 | -0.067981000 | 9.515704000  |
| 6 | -6.619022000  | -3.455728000 | 4.329173000  | 6 | -3.431534000 | -0.043433000 | 9.041427000  |
| 6 | -4.947155000  | -5.602961000 | 4.933918000  | 1 | 0.755086000  | 1.451161000  | 7.118606000  |
| 6 | -6.448866000  | -4.491587000 | 3.404884000  | 1 | -0.349780000 | 2.697230000  | 6.524895000  |
| 6 | -5.609952000  | -5.570310000 | 3.705078000  | 1 | -2.888540000 | 1.470205000  | 6.040634000  |
| 1 | -6.509576000  | -1.455992000 | 6.123633000  | 1 | -0.065258000 | 0.446380000  | 9.122648000  |
| 1 | -5.336769000  | -2.212858000 | 7.219103000  | 1 | -4.716252000 | 0.545126000  | 7.407109000  |
| 1 | -4.620597000  | -4.613944000 | 6.819074000  | 1 | -1.899103000 | -0.493511000 | 10.491399000 |
| 1 | -7.263081000  | -2.615694000 | 4.084766000  | 1 | -4.240111000 | -0.444412000 | 9.647038000  |
| 1 | -4.294544000  | -6.436750000 | 5.178603000  | 1 | -0.191266000 | 1.176539000  | 5.644361000  |
| 1 | -6.971199000  | -4.452028000 | 2.451772000  | 6 | 8.763153000  | 5.038479000  | -4.089210000 |
| 1 | -5.477980000  | -6.377297000 | 2.989803000  | 6 | 8.287058000  | 5.139660000  | -2.658437000 |
| 1 | -7.035033000  | -2.687018000 | 7.276916000  | 6 | 7.045192000  | 5.716609000  | -2.348192000 |
| 6 | -9.469022000  | -0.371979000 | 3.688384000  | 6 | 9.059043000  | 4.632061000  | -1.602492000 |
| 6 | -8.115293000  | 0.290790000  | 3.817689000  | 6 | 6.580229000  | 5.767425000  | -1.032308000 |
| 6 | -7.831058000  | 1.155910000  | 4.883975000  | 6 | 8.600809000  | 4.684153000  | -0.282602000 |
| 6 | -7.101452000  | 0.061408000  | 2.875255000  | 6 | 7.353711000  | 5.246680000  | 0.011589000  |
| 6 | -6.584237000  | 1.772605000  | 5.006116000  | 1 | 8.369315000  | 5.857504000  | -4.700342000 |
| 6 | -5.851014000  | 0.674104000  | 2.977920000  | 1 | 9.856274000  | 5.067553000  | -4.149453000 |
| 6 | -5.595351000  | 1.541124000  | 4.042728000  | 1 | 6.440781000  | 6.137170000  | -3.149126000 |
| 8 | -4.355141000  | 2.142123000  | 4.116188000  | 1 | 10.035111000 | 4.201682000  | -1.815789000 |
| 1 | -9.539197000  | -1.281570000 | 4.301023000  | 1 | 5.619594000  | 6.228020000  | -6.815674000 |
| 1 | -9.671225000  | -0.662314000 | 2.652031000  | 1 | 9.223991000  | 4.296917000  | 0.519807000  |
| 1 | -8.597408000  | 1.359949000  | 5.628753000  | 1 | 6.989046000  | 5.273444000  | 1.034379000  |
| 1 | -7.302612000  | -0.579950000 | 2.020227000  | 1 | 8.430780000  | 4.095923000  | -4.544119000 |
| 1 | -6.379745000  | 2.438790000  | 5.840930000  | 8 | -2.976185000 | 0.975488000  | -2.050179000 |
| 1 | -5.089879000  | 0.535171000  | 2.215388000  | 6 | -3.013504000 | 1.200926000  | -0.812425000 |
| 1 | -4.473116000  | 3.086158000  | 4.338013000  | 8 | -3.840618000 | 0.747568000  | 0.016832000  |
| 1 | -10.274923000 | 0.294599000  | 4.014772000  | 6 | -1.928434000 | 2.115353000  | -0.230602000 |
| 6 | -10.330716000 | -2.402451000 | -1.442857000 | 7 | -1.990663000 | 3.082330000  | 0.574245000  |
| 6 | -8.859846000  | -2.193832000 | -1.162175000 | 6 | -3.249871000 | 3.601340000  | 1.102863000  |
| 6 | -8.306774000  | -0.908722000 | -1.092467000 | 1 | -0.044105000 | 2.308591000  | -0.170856000 |
| 6 | -7.992503000  | -3.283053000 | -0.992583000 | 1 | -4.108850000 | 3.279355000  | 0.501460000  |
| 6 | -6.944067000  | -0.705281000 | -0.866136000 | 6 | -4.976119000 | 6.827098000  | 0.806058000  |
| 6 | -6.628890000  | -3.101896000 | -0.766040000 | 6 | -4.271118000 | 5.952694000  | 1.901638000  |
| 6 | -6.098713000  | -1.807995000 | -0.700279000 | 6 | -3.138838000 | 5.134920000  | 1.154737000  |
| 8 | -4.755049000  | -1.665995000 | -0.465858000 | 6 | -3.819250000 | 7.089986000  | -0.183935000 |
| 1 | -10.921543000 | -1.526172000 | -1.155674000 | 6 | -3.046276000 | 5.764892000  | -0.262381000 |
| 1 | -10.726443000 | -3.267100000 | -0.898200000 | 6 | -6.113340000 | 6.034963000  | 0.111480000  |
| 1 | -8.952603000  | -0.042591000 | -1.219524000 | 6 | -5.259172000 | 5.216165000  | 2.786786000  |
| 1 | -8.389805000  | -4.294655000 | -1.045036000 | 6 | -5.522420000 | 8.135553000  | 1.399186000  |
| 1 | -6.531426000  | 0.298029000  | -0.812984000 | 6 | -7.113295000 | 5.413091000  | 1.094705000  |
| 1 | -5.964498000  | -3.954344000 | -0.651061000 | 6 | -6.395675000 | 4.490369000  | 2.099309000  |
| 1 | -4.494641000  | -0.693431000 | -0.415297000 | 6 | -5.191738000 | 5.306215000  | 4.126369000  |
| 1 | -10.515460000 | -2.582463000 | -2.510487000 | 1 | -3.735558000 | 6.654008000  | 2.553415000  |
| 6 | -4.131297000  | -0.794345000 | -6.069090000 | 1 | -3.511724000 | 5.095465000  | -0.997678000 |
| 6 | -3.339126000  | 0.315960000  | -5.370597000 | 1 | -2.008457000 | 5.901813000  | -0.583345000 |
| 6 | -1.840901000  | 0.256739000  | -5.707952000 | 1 | -4.715536000 | 8.722978000  | 1.853994000  |
| 6 | -0.991188000  | 1.355800000  | -5.066027000 | 1 | -6.274018000 | 7.956057000  | 2.175561000  |
| 7 | -0.835966000  | 1.146579000  | -3.591197000 | 1 | -5.986995000 | 8.753628000  | 0.621100000  |
| 1 | -3.780875000  | -1.786122000 | -5.758186000 | 1 | -7.869909000 | 4.838745000  | 0.546153000  |
| 1 | -4.031919000  | -0.733088000 | -7.159977000 | 1 | -7.652877000 | 6.197589000  | 1.639657000  |
| 1 | -3.489649000  | 0.247347000  | -4.287276000 | 1 | -6.007892000 | 3.618672000  | 1.555450000  |
| 1 | -3.733526000  | 1.295732000  | -5.676293000 | 1 | -7.101018000 | 4.102915000  | 2.842237000  |
| 1 | -1.427416000  | -0.720544000 | -5.422674000 | 1 | -5.956115000 | 4.865741000  | 4.764636000  |
| 1 | -1.708644000  | 0.342381000  | -6.794763000 | 1 | -2.203890000 | 5.333815000  | 1.691701000  |
| 1 | -1.443289000  | 2.342729000  | -5.208836000 | 1 | -4.411491000 | 5.877784000  | 4.624629000  |
| 1 | 0.014089000   | 1.377390000  | -5.497601000 | 1 | -4.176366000 | 7.436719000  | -1.161631000 |
| 1 | -0.494363000  | 0.185339000  | -3.368162000 | 1 | -5.684882000 | 5.228424000  | -0.498741000 |
| 1 | -1.741902000  | 1.225744000  | -3.022066000 | 1 | -6.634351000 | 6.703387000  | -0.586816000 |
| 1 | -0.173369000  | 1.799335000  | -3.167296000 | 1 | -3.171230000 | 7.879940000  | 0.220130000  |
| 1 | -5.196825000  | -0.728531000 | -5.825809000 | 1 | -3.387736000 | 3.185646000  | 2.107358000  |
